# Supplementary material for: Network-Based Analysis of OMICs Data to Understand the HIV–Host Interaction
Source: Front Microbiol. 2020 Jun 17;11:1314. doi: 10.3389/fmicb.2020.01314 (PMC7311653; doi:10.3389/fmicb.2020.01314)
Supplement: Supplementary file 1 [file Data_Sheet_1.xlsx]

## Sheet: Table S1
Table S1. The list of 2910 HIV-1-human protein-protein interactions. * HIV-1 NCBI Reference Sequence Accession or UniProt Accession
HIV-1 gene/protein ID*	HIV-1 gene symbol	Human SwissProt Accession	HIV taxon ID	Database	HIV taxon name
NP_579876	gag	O00560	11676	VirHostNet	Human immunodeficiency virus 1
NP_579876	gag	O14980	11676	VirHostNet	Human immunodeficiency virus 1
NP_579876	gag	O43324	11676	VirHostNet	Human immunodeficiency virus 1
NP_579876	gag	O60841	11676	VirHostNet	Human immunodeficiency virus 1
NP_579876	gag	O75530	11676	VirHostNet	Human immunodeficiency virus 1
NP_579876	gag	O75531	11676	VirHostNet	Human immunodeficiency virus 1
NP_579876	gag	P01579	11676	VirHostNet	Human immunodeficiency virus 1
NP_579876	gag	P07814	11676	VirHostNet	Human immunodeficiency virus 1
NP_579876	gag	P14868	11676	VirHostNet	Human immunodeficiency virus 1
NP_579876	gag	P17252	11676	VirHostNet	Human immunodeficiency virus 1
NP_579876	gag	P26639	11676	VirHostNet	Human immunodeficiency virus 1
NP_579876	gag	P41252	11676	VirHostNet	Human immunodeficiency virus 1
NP_579876	gag	P47897	11676	VirHostNet	Human immunodeficiency virus 1
NP_579876	gag	P49590	11676	VirHostNet	Human immunodeficiency virus 1
NP_579876	gag	P52292	11676	VirHostNet	Human immunodeficiency virus 1
NP_579876	gag	P52294	11676	VirHostNet	Human immunodeficiency virus 1
NP_579876	gag	P54136	11676	VirHostNet	Human immunodeficiency virus 1
NP_579876	gag	P56192	11676	VirHostNet	Human immunodeficiency virus 1
NP_579876	gag	P68104	11676	VirHostNet	Human immunodeficiency virus 1
NP_579876	gag	Q12904	11676	VirHostNet	Human immunodeficiency virus 1
NP_579876	gag	Q13155	11676	VirHostNet	Human immunodeficiency virus 1
NP_579876	gag	Q13177	11676	VirHostNet	Human immunodeficiency virus 1
NP_579876	gag	Q14978	11676	VirHostNet	Human immunodeficiency virus 1
NP_579876	gag	Q15025	11676	VirHostNet	Human immunodeficiency virus 1
NP_579876	gag	Q15046	11676	VirHostNet	Human immunodeficiency virus 1
NP_579876	gag	Q86SQ7	11676	VirHostNet	Human immunodeficiency virus 1
NP_579876	gag	Q96I59	11676	VirHostNet	Human immunodeficiency virus 1
NP_579876	gag	Q9HD40	11676	VirHostNet	Human immunodeficiency virus 1
NP_579876	gag	Q9NTK5	11676	VirHostNet	Human immunodeficiency virus 1
NP_579876	gag	Q9P2J5	11676	VirHostNet	Human immunodeficiency virus 1
NP_579880	gag	P23284	11676	VirHostNet	Human immunodeficiency virus 1
NP_579880	gag	P62937	11676	VirHostNet	Human immunodeficiency virus 1
NP_579880	gag	Q15046	11676	VirHostNet	Human immunodeficiency virus 1
NP_579881	gag	O14974	11676	VirHostNet	Human immunodeficiency virus 1
NP_579881	gag	O75534	11676	VirHostNet	Human immunodeficiency virus 1
NP_579881	gag	P13489	11676	VirHostNet	Human immunodeficiency virus 1
NP_579881	gag	P55769	11676	VirHostNet	Human immunodeficiency virus 1
NP_579881	gag	Q7Z739	11676	VirHostNet	Human immunodeficiency virus 1
NP_579881	gag	Q8IUX4	11676	VirHostNet	Human immunodeficiency virus 1
NP_579881	gag	Q8N1G4	11676	VirHostNet	Human immunodeficiency virus 1
NP_579881	gag	Q99873	11676	VirHostNet	Human immunodeficiency virus 1
NP_579881	gag	Q9NXG2	11676	VirHostNet	Human immunodeficiency virus 1
NP_579881	gag	Q9UGY1	11676	VirHostNet	Human immunodeficiency virus 1
NP_579881	gag	Q9UI30	11676	VirHostNet	Human immunodeficiency virus 1
NP_579881	gag	Q9UI47	11676	VirHostNet	Human immunodeficiency virus 1
NP_579881	gag	Q9Y3B7	11676	VirHostNet	Human immunodeficiency virus 1
NP_579881	gag	Q9Y3F4	11676	VirHostNet	Human immunodeficiency virus 1
NP_579883	gag	P0CG47	11676	VirHostNet	Human immunodeficiency virus 1
NP_579883	gag	P0CG48	11676	VirHostNet	Human immunodeficiency virus 1
NP_579883	gag	P28482	11676	VirHostNet	Human immunodeficiency virus 1
NP_579883	gag	Q8WUM4	11676	VirHostNet	Human immunodeficiency virus 1
NP_579883	gag	Q99816	11676	VirHostNet	Human immunodeficiency virus 1
NP_579883	gag	Q9UER7	11676	VirHostNet	Human immunodeficiency virus 1
NP_579894	env	O00231	11676	VirHostNet	Human immunodeficiency virus 1
NP_579894	env	O14656	11676	VirHostNet	Human immunodeficiency virus 1
NP_579894	env	O14967	11676	VirHostNet	Human immunodeficiency virus 1
NP_579894	env	O15234	11676	VirHostNet	Human immunodeficiency virus 1
NP_579894	env	O15460	11676	VirHostNet	Human immunodeficiency virus 1
NP_579894	env	O43852	11676	VirHostNet	Human immunodeficiency virus 1
NP_579894	env	P01130	11676	VirHostNet	Human immunodeficiency virus 1
NP_579894	env	P01730	11676	VirHostNet	Human immunodeficiency virus 1
NP_579894	env	P04439	11676	VirHostNet	Human immunodeficiency virus 1
NP_579894	env	P05107	11676	VirHostNet	Human immunodeficiency virus 1
NP_579894	env	P13612	11676	VirHostNet	Human immunodeficiency virus 1
NP_579894	env	P14314	11676	VirHostNet	Human immunodeficiency virus 1
NP_579894	env	P14625	11676	VirHostNet	Human immunodeficiency virus 1
NP_579894	env	P17066	11676	VirHostNet	Human immunodeficiency virus 1
NP_579894	env	P26196	11676	VirHostNet	Human immunodeficiency virus 1
NP_579894	env	P27797	11676	VirHostNet	Human immunodeficiency virus 1
NP_579894	env	P28072	11676	VirHostNet	Human immunodeficiency virus 1
NP_579894	env	P48723	11676	VirHostNet	Human immunodeficiency virus 1
NP_579894	env	P48741	11676	VirHostNet	Human immunodeficiency virus 1
NP_579894	env	P50454	11676	VirHostNet	Human immunodeficiency virus 1
NP_579894	env	P51665	11676	VirHostNet	Human immunodeficiency virus 1
NP_579894	env	P61619	11676	VirHostNet	Human immunodeficiency virus 1
NP_579894	env	P68431	11676	VirHostNet	Human immunodeficiency virus 1
NP_579894	env	Q12805	11676	VirHostNet	Human immunodeficiency virus 1
NP_579894	env	Q13112	11676	VirHostNet	Human immunodeficiency virus 1
NP_579894	env	Q13217	11676	VirHostNet	Human immunodeficiency virus 1
NP_579894	env	Q13283	11676	VirHostNet	Human immunodeficiency virus 1
NP_579894	env	Q13724	11676	VirHostNet	Human immunodeficiency virus 1
NP_579894	env	Q14257	11676	VirHostNet	Human immunodeficiency virus 1
NP_579894	env	Q14554	11676	VirHostNet	Human immunodeficiency virus 1
NP_579894	env	Q14697	11676	VirHostNet	Human immunodeficiency virus 1
NP_579894	env	Q15165	11676	VirHostNet	Human immunodeficiency virus 1
NP_579894	env	Q3MHD2	11676	VirHostNet	Human immunodeficiency virus 1
NP_579894	env	Q5BKY9	11676	VirHostNet	Human immunodeficiency virus 1
NP_579894	env	Q8NBJ5	11676	VirHostNet	Human immunodeficiency virus 1
NP_579894	env	Q8NBJ7	11676	VirHostNet	Human immunodeficiency virus 1
NP_579894	env	Q8NBS9	11676	VirHostNet	Human immunodeficiency virus 1
NP_579894	env	Q8NFQ8	11676	VirHostNet	Human immunodeficiency virus 1
NP_579894	env	Q92598	11676	VirHostNet	Human immunodeficiency virus 1
NP_579894	env	Q96EE3	11676	VirHostNet	Human immunodeficiency virus 1
NP_579894	env	Q99470	11676	VirHostNet	Human immunodeficiency virus 1
NP_579894	env	Q9BRK5	11676	VirHostNet	Human immunodeficiency virus 1
NP_579894	env	Q9BS26	11676	VirHostNet	Human immunodeficiency virus 1
NP_579894	env	Q9BTV4	11676	VirHostNet	Human immunodeficiency virus 1
NP_579894	env	Q9BUT9	11676	VirHostNet	Human immunodeficiency virus 1
NP_579894	env	Q9BV68	11676	VirHostNet	Human immunodeficiency virus 1
NP_579894	env	Q9BZQ6	11676	VirHostNet	Human immunodeficiency virus 1
NP_579894	env	Q9H0U3	11676	VirHostNet	Human immunodeficiency virus 1
NP_579894	env	Q9HCN8	11676	VirHostNet	Human immunodeficiency virus 1
NP_579894	env	Q9NYJ8	11676	VirHostNet	Human immunodeficiency virus 1
NP_579894	env	Q9UBS4	11676	VirHostNet	Human immunodeficiency virus 1
NP_579894	env	Q9UI08	11676	VirHostNet	Human immunodeficiency virus 1
NP_579894	env	Q9UN86	11676	VirHostNet	Human immunodeficiency virus 1
NP_579894	env	Q9Y4L1	11676	VirHostNet	Human immunodeficiency virus 1
NP_579895	env	O00264	11676	VirHostNet	Human immunodeficiency virus 1
NP_579895	env	O15162	11676	VirHostNet	Human immunodeficiency virus 1
NP_579895	env	O15258	11676	VirHostNet	Human immunodeficiency virus 1
NP_579895	env	O15260	11676	VirHostNet	Human immunodeficiency virus 1
NP_579895	env	O60220	11676	VirHostNet	Human immunodeficiency virus 1
NP_579895	env	O75955	11676	VirHostNet	Human immunodeficiency virus 1
NP_579895	env	O94919	11676	VirHostNet	Human immunodeficiency virus 1
NP_579895	env	O96000	11676	VirHostNet	Human immunodeficiency virus 1
NP_579895	env	O96008	11676	VirHostNet	Human immunodeficiency virus 1
NP_579895	env	P08134	11676	VirHostNet	Human immunodeficiency virus 1
NP_579895	env	P13073	11676	VirHostNet	Human immunodeficiency virus 1
NP_579895	env	P14314	11676	VirHostNet	Human immunodeficiency virus 1
NP_579895	env	P14854	11676	VirHostNet	Human immunodeficiency virus 1
NP_579895	env	P20674	11676	VirHostNet	Human immunodeficiency virus 1
NP_579895	env	P21796	11676	VirHostNet	Human immunodeficiency virus 1
NP_579895	env	P30101	11676	VirHostNet	Human immunodeficiency virus 1
NP_579895	env	P35221	11676	VirHostNet	Human immunodeficiency virus 1
NP_579895	env	P35232	11676	VirHostNet	Human immunodeficiency virus 1
NP_579895	env	P45880	11676	VirHostNet	Human immunodeficiency virus 1
NP_579895	env	P48426	11676	VirHostNet	Human immunodeficiency virus 1
NP_579895	env	P49257	11676	VirHostNet	Human immunodeficiency virus 1
NP_579895	env	P51572	11676	VirHostNet	Human immunodeficiency virus 1
NP_579895	env	P55072	11676	VirHostNet	Human immunodeficiency virus 1
NP_579895	env	P61009	11676	VirHostNet	Human immunodeficiency virus 1
NP_579895	env	P63010	11676	VirHostNet	Human immunodeficiency virus 1
NP_579895	env	Q03135	11676	VirHostNet	Human immunodeficiency virus 1
NP_579895	env	Q07065	11676	VirHostNet	Human immunodeficiency virus 1
NP_579895	env	Q12907	11676	VirHostNet	Human immunodeficiency virus 1
NP_579895	env	Q13162	11676	VirHostNet	Human immunodeficiency virus 1
NP_579895	env	Q15005	11676	VirHostNet	Human immunodeficiency virus 1
NP_579895	env	Q6DD88	11676	VirHostNet	Human immunodeficiency virus 1
NP_579895	env	Q8IYS2	11676	VirHostNet	Human immunodeficiency virus 1
NP_579895	env	Q8N4V1	11676	VirHostNet	Human immunodeficiency virus 1
NP_579895	env	Q8N766	11676	VirHostNet	Human immunodeficiency virus 1
NP_579895	env	Q8NBS9	11676	VirHostNet	Human immunodeficiency virus 1
NP_579895	env	Q92896	11676	VirHostNet	Human immunodeficiency virus 1
NP_579895	env	Q96AJ9	11676	VirHostNet	Human immunodeficiency virus 1
NP_579895	env	Q96DZ1	11676	VirHostNet	Human immunodeficiency virus 1
NP_579895	env	Q96IV0	11676	VirHostNet	Human immunodeficiency virus 1
NP_579895	env	Q96R06	11676	VirHostNet	Human immunodeficiency virus 1
NP_579895	env	Q99442	11676	VirHostNet	Human immunodeficiency virus 1
NP_579895	env	Q99623	11676	VirHostNet	Human immunodeficiency virus 1
NP_579895	env	Q9BXS5	11676	VirHostNet	Human immunodeficiency virus 1
NP_579895	env	Q9NRD1	11676	VirHostNet	Human immunodeficiency virus 1
NP_579895	env	Q9NVV0	11676	VirHostNet	Human immunodeficiency virus 1
NP_579895	env	Q9NYU2	11676	VirHostNet	Human immunodeficiency virus 1
NP_579895	env	Q9P035	11676	VirHostNet	Human immunodeficiency virus 1
NP_579895	env	Q9P0L0	11676	VirHostNet	Human immunodeficiency virus 1
NP_579895	env	Q9UBV2	11676	VirHostNet	Human immunodeficiency virus 1
NP_579895	env	Q9UI14	11676	VirHostNet	Human immunodeficiency virus 1
NP_579895	env	Q9UJZ1	11676	VirHostNet	Human immunodeficiency virus 1
NP_579895	env	Q9Y277	11676	VirHostNet	Human immunodeficiency virus 1
NP_579895	env	Q9Y3P9	11676	VirHostNet	Human immunodeficiency virus 1
NP_579895	env	Q9Y5J9	11676	VirHostNet	Human immunodeficiency virus 1
NP_579895	env	Q9Y5L4	11676	VirHostNet	Human immunodeficiency virus 1
NP_705926	gag-pol	O00303	11676	VirHostNet	Human immunodeficiency virus 1
NP_705926	gag-pol	O14976	11676	VirHostNet	Human immunodeficiency virus 1
NP_705926	gag-pol	O15371	11676	VirHostNet	Human immunodeficiency virus 1
NP_705926	gag-pol	O15372	11676	VirHostNet	Human immunodeficiency virus 1
NP_705926	gag-pol	O60232	11676	VirHostNet	Human immunodeficiency virus 1
NP_705926	gag-pol	O60610	11676	VirHostNet	Human immunodeficiency virus 1
NP_705926	gag-pol	O94916	11676	VirHostNet	Human immunodeficiency virus 1
NP_705926	gag-pol	O95714	11676	VirHostNet	Human immunodeficiency virus 1
NP_705926	gag-pol	P01023	11676	VirHostNet	Human immunodeficiency virus 1
NP_705926	gag-pol	P01584	11676	VirHostNet	Human immunodeficiency virus 1
NP_705926	gag-pol	P02549	11676	VirHostNet	Human immunodeficiency virus 1
NP_705926	gag-pol	P02751	11676	VirHostNet	Human immunodeficiency virus 1
NP_705926	gag-pol	P08670	11676	VirHostNet	Human immunodeficiency virus 1
NP_705926	gag-pol	P0DP25	11676	VirHostNet	Human immunodeficiency virus 1
NP_705926	gag-pol	P10415	11676	VirHostNet	Human immunodeficiency virus 1
NP_705926	gag-pol	P11940	11676	VirHostNet	Human immunodeficiency virus 1
NP_705926	gag-pol	P12814	11676	VirHostNet	Human immunodeficiency virus 1
NP_705926	gag-pol	P13797	11676	VirHostNet	Human immunodeficiency virus 1
NP_705926	gag-pol	P16144	11676	VirHostNet	Human immunodeficiency virus 1
NP_705926	gag-pol	P17661	11676	VirHostNet	Human immunodeficiency virus 1
NP_705926	gag-pol	P18206	11676	VirHostNet	Human immunodeficiency virus 1
NP_705926	gag-pol	P19838	11676	VirHostNet	Human immunodeficiency virus 1
NP_705926	gag-pol	P23526	11676	VirHostNet	Human immunodeficiency virus 1
NP_705926	gag-pol	P26006	11676	VirHostNet	Human immunodeficiency virus 1
NP_705926	gag-pol	P32121	11676	VirHostNet	Human immunodeficiency virus 1
NP_705926	gag-pol	P33991	11676	VirHostNet	Human immunodeficiency virus 1
NP_705926	gag-pol	P43246	11676	VirHostNet	Human immunodeficiency virus 1
NP_705926	gag-pol	P46019	11676	VirHostNet	Human immunodeficiency virus 1
NP_705926	gag-pol	P49591	11676	VirHostNet	Human immunodeficiency virus 1
NP_705926	gag-pol	P55884	11676	VirHostNet	Human immunodeficiency virus 1
NP_705926	gag-pol	P58107	11676	VirHostNet	Human immunodeficiency virus 1
NP_705926	gag-pol	P60228	11676	VirHostNet	Human immunodeficiency virus 1
NP_705926	gag-pol	P61758	11676	VirHostNet	Human immunodeficiency virus 1
NP_705926	gag-pol	Q02790	11676	VirHostNet	Human immunodeficiency virus 1
NP_705926	gag-pol	Q04637	11676	VirHostNet	Human immunodeficiency virus 1
NP_705926	gag-pol	Q07820	11676	VirHostNet	Human immunodeficiency virus 1
NP_705926	gag-pol	Q07864	11676	VirHostNet	Human immunodeficiency virus 1
NP_705926	gag-pol	Q12874	11676	VirHostNet	Human immunodeficiency virus 1
NP_705926	gag-pol	Q12948	11676	VirHostNet	Human immunodeficiency virus 1
NP_705926	gag-pol	Q14152	11676	VirHostNet	Human immunodeficiency virus 1
NP_705926	gag-pol	Q14651	11676	VirHostNet	Human immunodeficiency virus 1
NP_705926	gag-pol	Q32P44	11676	VirHostNet	Human immunodeficiency virus 1
NP_705926	gag-pol	Q7L2H7	11676	VirHostNet	Human immunodeficiency virus 1
NP_705926	gag-pol	Q86US8	11676	VirHostNet	Human immunodeficiency virus 1
NP_705926	gag-pol	Q86X55	11676	VirHostNet	Human immunodeficiency virus 1
NP_705926	gag-pol	Q8N163	11676	VirHostNet	Human immunodeficiency virus 1
NP_705926	gag-pol	Q8NFF5	11676	VirHostNet	Human immunodeficiency virus 1
NP_705926	gag-pol	Q8NFG4	11676	VirHostNet	Human immunodeficiency virus 1
NP_705926	gag-pol	Q8TB72	11676	VirHostNet	Human immunodeficiency virus 1
NP_705926	gag-pol	Q8TCU4	11676	VirHostNet	Human immunodeficiency virus 1
NP_705926	gag-pol	Q8TD16	11676	VirHostNet	Human immunodeficiency virus 1
NP_705926	gag-pol	Q8TF40	11676	VirHostNet	Human immunodeficiency virus 1
NP_705926	gag-pol	Q92597	11676	VirHostNet	Human immunodeficiency virus 1
NP_705926	gag-pol	Q92805	11676	VirHostNet	Human immunodeficiency virus 1
NP_705926	gag-pol	Q93100	11676	VirHostNet	Human immunodeficiency virus 1
NP_705926	gag-pol	Q99613	11676	VirHostNet	Human immunodeficiency virus 1
NP_705926	gag-pol	Q99704	11676	VirHostNet	Human immunodeficiency virus 1
NP_705926	gag-pol	Q99996	11676	VirHostNet	Human immunodeficiency virus 1
NP_705926	gag-pol	Q9BTY7	11676	VirHostNet	Human immunodeficiency virus 1
NP_705926	gag-pol	Q9BU89	11676	VirHostNet	Human immunodeficiency virus 1
NP_705926	gag-pol	Q9BZF3	11676	VirHostNet	Human immunodeficiency virus 1
NP_705926	gag-pol	Q9H1A4	11676	VirHostNet	Human immunodeficiency virus 1
NP_705926	gag-pol	Q9H4L5	11676	VirHostNet	Human immunodeficiency virus 1
NP_705926	gag-pol	Q9HBG6	11676	VirHostNet	Human immunodeficiency virus 1
NP_705926	gag-pol	Q9NR33	11676	VirHostNet	Human immunodeficiency virus 1
NP_705926	gag-pol	Q9NRF9	11676	VirHostNet	Human immunodeficiency virus 1
NP_705926	gag-pol	Q9NZN5	11676	VirHostNet	Human immunodeficiency virus 1
NP_705926	gag-pol	Q9UBQ5	11676	VirHostNet	Human immunodeficiency virus 1
NP_705926	gag-pol	Q9UGP4	11676	VirHostNet	Human immunodeficiency virus 1
NP_705926	gag-pol	Q9UHF7	11676	VirHostNet	Human immunodeficiency virus 1
NP_705926	gag-pol	Q9UKK3	11676	VirHostNet	Human immunodeficiency virus 1
NP_705926	gag-pol	Q9UMS0	11676	VirHostNet	Human immunodeficiency virus 1
NP_705926	gag-pol	Q9UN36	11676	VirHostNet	Human immunodeficiency virus 1
NP_705926	gag-pol	Q9Y262	11676	VirHostNet	Human immunodeficiency virus 1
NP_705926	gag-pol	Q9Y490	11676	VirHostNet	Human immunodeficiency virus 1
NP_705926	gag-pol	Q9Y4G6	11676	VirHostNet	Human immunodeficiency virus 1
NP_705927	gag-pol	P60709	11676	VirHostNet	Human immunodeficiency virus 1
NP_705927	gag-pol	Q8IUX4	11676	VirHostNet	Human immunodeficiency virus 1
NP_705928	gag-pol	O00469	11676	VirHostNet	Human immunodeficiency virus 1
NP_705928	gag-pol	O14893	11676	VirHostNet	Human immunodeficiency virus 1
NP_705928	gag-pol	O60518	11676	VirHostNet	Human immunodeficiency virus 1
NP_705928	gag-pol	O75155	11676	VirHostNet	Human immunodeficiency virus 1
NP_705928	gag-pol	O75475	11676	VirHostNet	Human immunodeficiency virus 1
NP_705928	gag-pol	O75530	11676	VirHostNet	Human immunodeficiency virus 1
NP_705928	gag-pol	O76071	11676	VirHostNet	Human immunodeficiency virus 1
NP_705928	gag-pol	O95373	11676	VirHostNet	Human immunodeficiency virus 1
NP_705928	gag-pol	P10809	11676	VirHostNet	Human immunodeficiency virus 1
NP_705928	gag-pol	P12532	11676	VirHostNet	Human immunodeficiency virus 1
NP_705928	gag-pol	P13051	11676	VirHostNet	Human immunodeficiency virus 1
NP_705928	gag-pol	P13667	11676	VirHostNet	Human immunodeficiency virus 1
NP_705928	gag-pol	P15924	11676	VirHostNet	Human immunodeficiency virus 1
NP_705928	gag-pol	P17096	11676	VirHostNet	Human immunodeficiency virus 1
NP_705928	gag-pol	P22314	11676	VirHostNet	Human immunodeficiency virus 1
NP_705928	gag-pol	P22674	11676	VirHostNet	Human immunodeficiency virus 1
NP_705928	gag-pol	P31946	11676	VirHostNet	Human immunodeficiency virus 1
NP_705928	gag-pol	P52292	11676	VirHostNet	Human immunodeficiency virus 1
NP_705928	gag-pol	P61981	11676	VirHostNet	Human immunodeficiency virus 1
NP_705928	gag-pol	P62258	11676	VirHostNet	Human immunodeficiency virus 1
NP_705928	gag-pol	P63104	11676	VirHostNet	Human immunodeficiency virus 1
NP_705928	gag-pol	Q02809	11676	VirHostNet	Human immunodeficiency virus 1
NP_705928	gag-pol	Q09472	11676	VirHostNet	Human immunodeficiency virus 1
NP_705928	gag-pol	Q14566	11676	VirHostNet	Human immunodeficiency virus 1
NP_705928	gag-pol	Q2T9J0	11676	VirHostNet	Human immunodeficiency virus 1
NP_705928	gag-pol	Q7Z4H3	11676	VirHostNet	Human immunodeficiency virus 1
NP_705928	gag-pol	Q8NEW0	11676	VirHostNet	Human immunodeficiency virus 1
NP_705928	gag-pol	Q8TEX9	11676	VirHostNet	Human immunodeficiency virus 1
NP_705928	gag-pol	Q9GZS3	11676	VirHostNet	Human immunodeficiency virus 1
NP_705928	gag-pol	Q9H3U1	11676	VirHostNet	Human immunodeficiency virus 1
NP_705928	gag-pol	Q9H583	11676	VirHostNet	Human immunodeficiency virus 1
NP_705928	gag-pol	Q9NS91	11676	VirHostNet	Human immunodeficiency virus 1
NP_705928	gag-pol	Q9P2R7	11676	VirHostNet	Human immunodeficiency virus 1
NP_705928	gag-pol	Q9Y263	11676	VirHostNet	Human immunodeficiency virus 1
NP_705928	gag-pol	Q9Y3D0	11676	VirHostNet	Human immunodeficiency virus 1
NP_789739	gag-pol	O14745	11676	VirHostNet	Human immunodeficiency virus 1
NP_789739	gag-pol	P62993	11676	VirHostNet	Human immunodeficiency virus 1
NP_789739	gag-pol	Q69YN4	11676	VirHostNet	Human immunodeficiency virus 1
NP_789740	gag-pol	O00303	11676	VirHostNet	Human immunodeficiency virus 1
NP_789740	gag-pol	O15371	11676	VirHostNet	Human immunodeficiency virus 1
NP_789740	gag-pol	O15372	11676	VirHostNet	Human immunodeficiency virus 1
NP_789740	gag-pol	O75475	11676	VirHostNet	Human immunodeficiency virus 1
NP_789740	gag-pol	O75821	11676	VirHostNet	Human immunodeficiency virus 1
NP_789740	gag-pol	P07858	11676	VirHostNet	Human immunodeficiency virus 1
NP_789740	gag-pol	P13667	11676	VirHostNet	Human immunodeficiency virus 1
NP_789740	gag-pol	P22830	11676	VirHostNet	Human immunodeficiency virus 1
NP_789740	gag-pol	P31350	11676	VirHostNet	Human immunodeficiency virus 1
NP_789740	gag-pol	P32121	11676	VirHostNet	Human immunodeficiency virus 1
NP_789740	gag-pol	P33991	11676	VirHostNet	Human immunodeficiency virus 1
NP_789740	gag-pol	P33993	11676	VirHostNet	Human immunodeficiency virus 1
NP_789740	gag-pol	P46063	11676	VirHostNet	Human immunodeficiency virus 1
NP_789740	gag-pol	P50213	11676	VirHostNet	Human immunodeficiency virus 1
NP_789740	gag-pol	P55884	11676	VirHostNet	Human immunodeficiency virus 1
NP_789740	gag-pol	P60228	11676	VirHostNet	Human immunodeficiency virus 1
NP_789740	gag-pol	P62714	11676	VirHostNet	Human immunodeficiency virus 1
NP_789740	gag-pol	P62993	11676	VirHostNet	Human immunodeficiency virus 1
NP_789740	gag-pol	Q08380	11676	VirHostNet	Human immunodeficiency virus 1
NP_789740	gag-pol	Q13347	11676	VirHostNet	Human immunodeficiency virus 1
NP_789740	gag-pol	Q14152	11676	VirHostNet	Human immunodeficiency virus 1
NP_789740	gag-pol	Q14566	11676	VirHostNet	Human immunodeficiency virus 1
NP_789740	gag-pol	Q15084	11676	VirHostNet	Human immunodeficiency virus 1
NP_789740	gag-pol	Q15293	11676	VirHostNet	Human immunodeficiency virus 1
NP_789740	gag-pol	Q2T9J0	11676	VirHostNet	Human immunodeficiency virus 1
NP_789740	gag-pol	Q5T4S7	11676	VirHostNet	Human immunodeficiency virus 1
NP_789740	gag-pol	Q8N163	11676	VirHostNet	Human immunodeficiency virus 1
NP_789740	gag-pol	Q99613	11676	VirHostNet	Human immunodeficiency virus 1
NP_789740	gag-pol	Q9BRX2	11676	VirHostNet	Human immunodeficiency virus 1
NP_789740	gag-pol	Q9H4L5	11676	VirHostNet	Human immunodeficiency virus 1
NP_789740	gag-pol	Q9P2R7	11676	VirHostNet	Human immunodeficiency virus 1
NP_789740	gag-pol	Q9UBQ5	11676	VirHostNet	Human immunodeficiency virus 1
NP_789740	gag-pol	Q9UGP4	11676	VirHostNet	Human immunodeficiency virus 1
NP_789740	gag-pol	Q9UJX6	11676	VirHostNet	Human immunodeficiency virus 1
NP_789740	gag-pol	Q9UMS0	11676	VirHostNet	Human immunodeficiency virus 1
NP_789740	gag-pol	Q9Y262	11676	VirHostNet	Human immunodeficiency virus 1
NP_789740	gag-pol	Q9Y265	11676	VirHostNet	Human immunodeficiency virus 1
NP_789740	gag-pol	Q9Y266	11676	VirHostNet	Human immunodeficiency virus 1
P04578	env	P29120	11676	VirusMentha	Human immunodeficiency virus 1
P04578	env	P29122	11676	VirusMentha	Human immunodeficiency virus 1
P04578	env	Q13087	11676	VirusMentha	Human immunodeficiency virus 1
P04578	env	P09958	11676	VirusMentha	Human immunodeficiency virus 1
P04578	env	P61073	11676	VirusMentha	Human immunodeficiency virus 1
P04578	env	P13987	11676	VirusMentha	Human immunodeficiency virus 1
P04578	env	Q92824	11676	VirusMentha	Human immunodeficiency virus 1
P04578	env	Q95460	11676	VirusMentha	Human immunodeficiency virus 1
P04578	env	P04843	11676	VirusMentha	Human immunodeficiency virus 1
P04578	env	P05067	11676	VirusMentha	Human immunodeficiency virus 1
P04578	env	P05107	11676	VirusMentha	Human immunodeficiency virus 1
P04578	env	P06239	11676	VirusMentha	Human immunodeficiency virus 1
P04578	env	P07339	11676	VirusMentha	Human immunodeficiency virus 1
P04578	env	P07384	11676	VirusMentha	Human immunodeficiency virus 1
P04578	env	P08134	11676	VirusMentha	Human immunodeficiency virus 1
P04578	env	P10321	11676	VirusMentha	Human immunodeficiency virus 1
P04578	env	P10809	11676	VirusMentha	Human immunodeficiency virus 1
P04578	env	P13073	11676	VirusMentha	Human immunodeficiency virus 1
P04578	env	P13612	11676	VirusMentha	Human immunodeficiency virus 1
P04578	env	P14314	11676	VirusMentha	Human immunodeficiency virus 1
P04578	env	P14625	11676	VirusMentha	Human immunodeficiency virus 1
P04578	env	P14854	11676	VirusMentha	Human immunodeficiency virus 1
P04578	env	P16615	11676	VirusMentha	Human immunodeficiency virus 1
P04578	env	P17066	11676	VirusMentha	Human immunodeficiency virus 1
P04578	env	P20674	11676	VirusMentha	Human immunodeficiency virus 1
P04578	env	P20701	11676	VirusMentha	Human immunodeficiency virus 1
P04578	env	P21796	11676	VirusMentha	Human immunodeficiency virus 1
P04578	env	P25786	11676	VirusMentha	Human immunodeficiency virus 1
P04578	env	P26196	11676	VirusMentha	Human immunodeficiency virus 1
P04578	env	P27797	11676	VirusMentha	Human immunodeficiency virus 1
P04578	env	P27824	11676	VirusMentha	Human immunodeficiency virus 1
P04578	env	P28072	11676	VirusMentha	Human immunodeficiency virus 1
P04578	env	P30101	11676	VirusMentha	Human immunodeficiency virus 1
P04578	env	P30443	11676	VirusMentha	Human immunodeficiency virus 1
P04578	env	P35232	11676	VirusMentha	Human immunodeficiency virus 1
P04578	env	P43629	11676	VirusMentha	Human immunodeficiency virus 1
P04578	env	P43630	11676	VirusMentha	Human immunodeficiency virus 1
P04578	env	P45880	11676	VirusMentha	Human immunodeficiency virus 1
P04578	env	P48426	11676	VirusMentha	Human immunodeficiency virus 1
P04578	env	P48723	11676	VirusMentha	Human immunodeficiency virus 1
P04578	env	P49257	11676	VirusMentha	Human immunodeficiency virus 1
P04578	env	P50454	11676	VirusMentha	Human immunodeficiency virus 1
P04578	env	P51571	11676	VirusMentha	Human immunodeficiency virus 1
P04578	env	P51572	11676	VirusMentha	Human immunodeficiency virus 1
P04578	env	P51665	11676	VirusMentha	Human immunodeficiency virus 1
P04578	env	P55072	11676	VirusMentha	Human immunodeficiency virus 1
P04578	env	P61009	11676	VirusMentha	Human immunodeficiency virus 1
P04578	env	P61619	11676	VirusMentha	Human immunodeficiency virus 1
P04578	env	P62195	11676	VirusMentha	Human immunodeficiency virus 1
P04578	env	P68431	11676	VirusMentha	Human immunodeficiency virus 1
P04578	env	Q07065	11676	VirusMentha	Human immunodeficiency virus 1
P04578	env	Q12805	11676	VirusMentha	Human immunodeficiency virus 1
P04578	env	Q12907	11676	VirusMentha	Human immunodeficiency virus 1
P04578	env	Q13112	11676	VirusMentha	Human immunodeficiency virus 1
P04578	env	Q13162	11676	VirusMentha	Human immunodeficiency virus 1
P04578	env	Q13217	11676	VirusMentha	Human immunodeficiency virus 1
P04578	env	Q13283	11676	VirusMentha	Human immunodeficiency virus 1
P04578	env	Q13438	11676	VirusMentha	Human immunodeficiency virus 1
P04578	env	Q13724	11676	VirusMentha	Human immunodeficiency virus 1
P04578	env	Q14257	11676	VirusMentha	Human immunodeficiency virus 1
P04578	env	Q14554	11676	VirusMentha	Human immunodeficiency virus 1
P04578	env	Q14574	11676	VirusMentha	Human immunodeficiency virus 1
P04578	env	Q14696	11676	VirusMentha	Human immunodeficiency virus 1
P04578	env	Q14697	11676	VirusMentha	Human immunodeficiency virus 1
P04578	env	Q15005	11676	VirusMentha	Human immunodeficiency virus 1
P04578	env	Q15165	11676	VirusMentha	Human immunodeficiency virus 1
P04578	env	Q15392	11676	VirusMentha	Human immunodeficiency virus 1
P04578	env	Q15782	11676	VirusMentha	Human immunodeficiency virus 1
P04578	env	Q3MHD2	11676	VirusMentha	Human immunodeficiency virus 1
P04578	env	Q5BKY9	11676	VirusMentha	Human immunodeficiency virus 1
P04578	env	Q6DD88	11676	VirusMentha	Human immunodeficiency virus 1
P04578	env	Q8IYS2	11676	VirusMentha	Human immunodeficiency virus 1
P04578	env	Q8N4V1	11676	VirusMentha	Human immunodeficiency virus 1
P04578	env	Q8N766	11676	VirusMentha	Human immunodeficiency virus 1
P04578	env	Q8NBJ5	11676	VirusMentha	Human immunodeficiency virus 1
P04578	env	Q8NBJ7	11676	VirusMentha	Human immunodeficiency virus 1
P04578	env	Q8NBS9	11676	VirusMentha	Human immunodeficiency virus 1
P04578	env	Q8NFQ8	11676	VirusMentha	Human immunodeficiency virus 1
P04578	env	Q8TCT9	11676	VirusMentha	Human immunodeficiency virus 1
P04578	env	Q92598	11676	VirusMentha	Human immunodeficiency virus 1
P04578	env	Q92896	11676	VirusMentha	Human immunodeficiency virus 1
P04578	env	Q93084	11676	VirusMentha	Human immunodeficiency virus 1
P04578	env	Q96AJ9	11676	VirusMentha	Human immunodeficiency virus 1
P04578	env	Q96DZ1	11676	VirusMentha	Human immunodeficiency virus 1
P04578	env	Q96EE3	11676	VirusMentha	Human immunodeficiency virus 1
P04578	env	Q96IV0	11676	VirusMentha	Human immunodeficiency virus 1
P04578	env	Q96R06	11676	VirusMentha	Human immunodeficiency virus 1
P04578	env	Q96RQ1	11676	VirusMentha	Human immunodeficiency virus 1
P04578	env	Q99442	11676	VirusMentha	Human immunodeficiency virus 1
P04578	env	Q99470	11676	VirusMentha	Human immunodeficiency virus 1
P04578	env	Q99623	11676	VirusMentha	Human immunodeficiency virus 1
P04578	env	Q99942	11676	VirusMentha	Human immunodeficiency virus 1
P04578	env	Q9BRK5	11676	VirusMentha	Human immunodeficiency virus 1
P04578	env	Q9BS26	11676	VirusMentha	Human immunodeficiency virus 1
P04578	env	Q9BTV4	11676	VirusMentha	Human immunodeficiency virus 1
P04578	env	Q9BUT9	11676	VirusMentha	Human immunodeficiency virus 1
P04578	env	Q9BUV8	11676	VirusMentha	Human immunodeficiency virus 1
P04578	env	Q9BV68	11676	VirusMentha	Human immunodeficiency virus 1
P04578	env	Q9BXS5	11676	VirusMentha	Human immunodeficiency virus 1
P04578	env	Q9BYC5	11676	VirusMentha	Human immunodeficiency virus 1
P04578	env	Q9BZQ6	11676	VirusMentha	Human immunodeficiency virus 1
P04578	env	Q9H0U3	11676	VirusMentha	Human immunodeficiency virus 1
P04578	env	Q9H3P7	11676	VirusMentha	Human immunodeficiency virus 1
P04578	env	Q9H496	11676	VirusMentha	Human immunodeficiency virus 1
P04578	env	Q9HCN8	11676	VirusMentha	Human immunodeficiency virus 1
P04578	env	Q9NRD1	11676	VirusMentha	Human immunodeficiency virus 1
P04578	env	Q9NVV0	11676	VirusMentha	Human immunodeficiency virus 1
P04578	env	Q9NWW5	11676	VirusMentha	Human immunodeficiency virus 1
P04578	env	Q9NYJ8	11676	VirusMentha	Human immunodeficiency virus 1
P04578	env	Q9NYU2	11676	VirusMentha	Human immunodeficiency virus 1
P04578	env	Q9P035	11676	VirusMentha	Human immunodeficiency virus 1
P04578	env	Q9P0L0	11676	VirusMentha	Human immunodeficiency virus 1
P04578	env	Q9UBS4	11676	VirusMentha	Human immunodeficiency virus 1
P04578	env	Q9UBV2	11676	VirusMentha	Human immunodeficiency virus 1
P04578	env	Q9UI08	11676	VirusMentha	Human immunodeficiency virus 1
P04578	env	Q9UJZ1	11676	VirusMentha	Human immunodeficiency virus 1
P04578	env	Q9UN86	11676	VirusMentha	Human immunodeficiency virus 1
P04578	env	Q9Y277	11676	VirusMentha	Human immunodeficiency virus 1
P04578	env	Q9Y282	11676	VirusMentha	Human immunodeficiency virus 1
P04578	env	Q9Y287	11676	VirusMentha	Human immunodeficiency virus 1
P04578	env	Q9Y3P9	11676	VirusMentha	Human immunodeficiency virus 1
P04578	env	Q9Y4L1	11676	VirusMentha	Human immunodeficiency virus 1
P04578	env	Q9Y5J9	11676	VirusMentha	Human immunodeficiency virus 1
P04578	env	Q9Y5L4	11676	VirusMentha	Human immunodeficiency virus 1
P04578	env	P08311	11676	VirusMentha	Human immunodeficiency virus 1
P04578	env	P08962	11676	VirusMentha	Human immunodeficiency virus 1
P04578	env	Q13501	11676	VirusMentha	Human immunodeficiency virus 1
P04578	env	P04216	11676	VirusMentha	Human immunodeficiency virus 1
P04578	env	O00231	11676	VirusMentha	Human immunodeficiency virus 1
P04578	env	O00264	11676	VirusMentha	Human immunodeficiency virus 1
P04578	env	O14656	11676	VirusMentha	Human immunodeficiency virus 1
P04578	env	O14967	11676	VirusMentha	Human immunodeficiency virus 1
P04578	env	O15162	11676	VirusMentha	Human immunodeficiency virus 1
P04578	env	O15234	11676	VirusMentha	Human immunodeficiency virus 1
P04578	env	O15258	11676	VirusMentha	Human immunodeficiency virus 1
P04578	env	O15260	11676	VirusMentha	Human immunodeficiency virus 1
P04578	env	O15460	11676	VirusMentha	Human immunodeficiency virus 1
P04578	env	O43318	11676	VirusMentha	Human immunodeficiency virus 1
P04578	env	O43852	11676	VirusMentha	Human immunodeficiency virus 1
P04578	env	O60220	11676	VirusMentha	Human immunodeficiency virus 1
P04578	env	O75955	11676	VirusMentha	Human immunodeficiency virus 1
P04578	env	O94901	11676	VirusMentha	Human immunodeficiency virus 1
P04578	env	O94919	11676	VirusMentha	Human immunodeficiency virus 1
P04578	env	O96000	11676	VirusMentha	Human immunodeficiency virus 1
P04578	env	O96008	11676	VirusMentha	Human immunodeficiency virus 1
P04578	env	P01130	11676	VirusMentha	Human immunodeficiency virus 1
P04578	env	P01889	11676	VirusMentha	Human immunodeficiency virus 1
P04578	env	P02751	11676	VirusMentha	Human immunodeficiency virus 1
P04578	env	P02786	11676	VirusMentha	Human immunodeficiency virus 1
P04578	env	P04439	11676	VirusMentha	Human immunodeficiency virus 1
P04591	gag	Q9BY43	11676	VirusMentha	Human immunodeficiency virus 1
P04591	gag	Q9H3S7	11676	VirusMentha	Human immunodeficiency virus 1
P04591	gag	Q9HC16	11676	VirusMentha	Human immunodeficiency virus 1
P04591	gag	P30419	11676	VirusMentha	Human immunodeficiency virus 1
P04591	gag	Q15025	11676	VirusMentha	Human immunodeficiency virus 1
P04591	gag	Q13617	11676	VirusMentha	Human immunodeficiency virus 1
P04591	gag	Q15369	11676	VirusMentha	Human immunodeficiency virus 1
P04591	gag	Q15370	11676	VirusMentha	Human immunodeficiency virus 1
P04591	gag	Q4VCS5	11676	VirusMentha	Human immunodeficiency virus 1
P04591	gag	P57075	11676	VirusMentha	Human immunodeficiency virus 1
P04591	gag	Q5VW32	11676	VirusMentha	Human immunodeficiency virus 1
P04591	gag	P13987	11676	VirusMentha	Human immunodeficiency virus 1
P04591	gag	P62877	11676	VirusMentha	Human immunodeficiency virus 1
P04591	gag	P26196	11676	VirusMentha	Human immunodeficiency virus 1
P04591	gag	P63165	11676	VirusMentha	Human immunodeficiency virus 1
P04591	gag	Q9P253	11676	VirusMentha	Human immunodeficiency virus 1
P04591	gag	Q9UKV8	11676	VirusMentha	Human immunodeficiency virus 1
P04591	gag	Q9UN37	11676	VirusMentha	Human immunodeficiency virus 1
P04591	gag	Q95460	11676	VirusMentha	Human immunodeficiency virus 1
P04591	gag	P05412	11676	VirusMentha	Human immunodeficiency virus 1
P04591	gag	P07814	11676	VirusMentha	Human immunodeficiency virus 1
P04591	gag	P08962	11676	VirusMentha	Human immunodeficiency virus 1
P04591	gag	P13489	11676	VirusMentha	Human immunodeficiency virus 1
P04591	gag	P14868	11676	VirusMentha	Human immunodeficiency virus 1
P04591	gag	P15880	11676	VirusMentha	Human immunodeficiency virus 1
P04591	gag	P17844	11676	VirusMentha	Human immunodeficiency virus 1
P04591	gag	P18583	11676	VirusMentha	Human immunodeficiency virus 1
P04591	gag	P22492	11676	VirusMentha	Human immunodeficiency virus 1
P04591	gag	P23396	11676	VirusMentha	Human immunodeficiency virus 1
P04591	gag	P26639	11676	VirusMentha	Human immunodeficiency virus 1
P04591	gag	P41252	11676	VirusMentha	Human immunodeficiency virus 1
P04591	gag	P42766	11676	VirusMentha	Human immunodeficiency virus 1
P04591	gag	P46776	11676	VirusMentha	Human immunodeficiency virus 1
P04591	gag	P46779	11676	VirusMentha	Human immunodeficiency virus 1
P04591	gag	P46782	11676	VirusMentha	Human immunodeficiency virus 1
P04591	gag	P47897	11676	VirusMentha	Human immunodeficiency virus 1
P04591	gag	P47914	11676	VirusMentha	Human immunodeficiency virus 1
P04591	gag	P49207	11676	VirusMentha	Human immunodeficiency virus 1
P04591	gag	P49590	11676	VirusMentha	Human immunodeficiency virus 1
P04591	gag	P54136	11676	VirusMentha	Human immunodeficiency virus 1
P04591	gag	P56192	11676	VirusMentha	Human immunodeficiency virus 1
P04591	gag	P60033	11676	VirusMentha	Human immunodeficiency virus 1
P04591	gag	P61221	11676	VirusMentha	Human immunodeficiency virus 1
P04591	gag	P61513	11676	VirusMentha	Human immunodeficiency virus 1
P04591	gag	P62249	11676	VirusMentha	Human immunodeficiency virus 1
P04591	gag	P62913	11676	VirusMentha	Human immunodeficiency virus 1
P04591	gag	P63261	11676	VirusMentha	Human immunodeficiency virus 1
P04591	gag	P63279	11676	VirusMentha	Human immunodeficiency virus 1
P04591	gag	P68133	11676	VirusMentha	Human immunodeficiency virus 1
P04591	gag	P68431	11676	VirusMentha	Human immunodeficiency virus 1
P04591	gag	P83881	11676	VirusMentha	Human immunodeficiency virus 1
P04591	gag	Q02747	11676	VirusMentha	Human immunodeficiency virus 1
P04591	gag	Q06787	11676	VirusMentha	Human immunodeficiency virus 1
P04591	gag	Q08211	11676	VirusMentha	Human immunodeficiency virus 1
P04591	gag	Q12873	11676	VirusMentha	Human immunodeficiency virus 1
P04591	gag	Q12904	11676	VirusMentha	Human immunodeficiency virus 1
P04591	gag	Q13085	11676	VirusMentha	Human immunodeficiency virus 1
P04591	gag	Q13136	11676	VirusMentha	Human immunodeficiency virus 1
P04591	gag	Q13428	11676	VirusMentha	Human immunodeficiency virus 1
P04591	gag	Q14331	11676	VirusMentha	Human immunodeficiency virus 1
P04591	gag	Q15046	11676	VirusMentha	Human immunodeficiency virus 1
P04591	gag	Q16666	11676	VirusMentha	Human immunodeficiency virus 1
P04591	gag	Q5VWQ0	11676	VirusMentha	Human immunodeficiency virus 1
P04591	gag	Q6PCB5	11676	VirusMentha	Human immunodeficiency virus 1
P04591	gag	Q6UWE0	11676	VirusMentha	Human immunodeficiency virus 1
P04591	gag	Q7Z739	11676	VirusMentha	Human immunodeficiency virus 1
P04591	gag	Q86SQ7	11676	VirusMentha	Human immunodeficiency virus 1
P04591	gag	Q86UE4	11676	VirusMentha	Human immunodeficiency virus 1
P04591	gag	Q8N1G4	11676	VirusMentha	Human immunodeficiency virus 1
P04591	gag	Q96I25	11676	VirusMentha	Human immunodeficiency virus 1
P04591	gag	Q96I59	11676	VirusMentha	Human immunodeficiency virus 1
P04591	gag	Q96RQ3	11676	VirusMentha	Human immunodeficiency virus 1
P04591	gag	Q99550	11676	VirusMentha	Human immunodeficiency virus 1
P04591	gag	Q9BUP3	11676	VirusMentha	Human immunodeficiency virus 1
P04591	gag	Q9C035	11676	VirusMentha	Human immunodeficiency virus 1
P04591	gag	Q9H0A0	11676	VirusMentha	Human immunodeficiency virus 1
P04591	gag	Q9H0H0	11676	VirusMentha	Human immunodeficiency virus 1
P04591	gag	Q9H7P6	11676	VirusMentha	Human immunodeficiency virus 1
P04591	gag	Q9H9H4	11676	VirusMentha	Human immunodeficiency virus 1
P04591	gag	Q9NXG2	11676	VirusMentha	Human immunodeficiency virus 1
P04591	gag	Q9NZI8	11676	VirusMentha	Human immunodeficiency virus 1
P04591	gag	Q9P2J5	11676	VirusMentha	Human immunodeficiency virus 1
P04591	gag	Q9UER7	11676	VirusMentha	Human immunodeficiency virus 1
P04591	gag	Q9UGY1	11676	VirusMentha	Human immunodeficiency virus 1
P04591	gag	Q9UII4	11676	VirusMentha	Human immunodeficiency virus 1
P04591	gag	Q9UK41	11676	VirusMentha	Human immunodeficiency virus 1
P04591	gag	Q9UQ35	11676	VirusMentha	Human immunodeficiency virus 1
P04591	gag	Q9Y2W1	11676	VirusMentha	Human immunodeficiency virus 1
P04591	gag	Q9Y3F4	11676	VirusMentha	Human immunodeficiency virus 1
P04591	gag	Q9Y4L5	11676	VirusMentha	Human immunodeficiency virus 1
P04591	gag	Q9Y6Y0	11676	VirusMentha	Human immunodeficiency virus 1
P04591	gag	P07355	11676	VirusMentha	Human immunodeficiency virus 1
P04591	gag	Q7Z3U7	11676	VirusMentha	Human immunodeficiency virus 1
P04591	gag	Q8WUM4	11676	VirusMentha	Human immunodeficiency virus 1
P04591	gag	Q92841	11676	VirusMentha	Human immunodeficiency virus 1
P04591	gag	P62753	11676	VirusMentha	Human immunodeficiency virus 1
P04591	gag	P46934	11676	VirusMentha	Human immunodeficiency virus 1
P04591	gag	P60709	11676	VirusMentha	Human immunodeficiency virus 1
P04591	gag	P62937	11676	VirusMentha	Human immunodeficiency virus 1
P04591	gag	P0CG48	11676	VirusMentha	Human immunodeficiency virus 1
P04591	gag	Q99816	11676	VirusMentha	Human immunodeficiency virus 1
P04591	gag	O43747	11676	VirusMentha	Human immunodeficiency virus 1
P04591	gag	O60551	11676	VirusMentha	Human immunodeficiency virus 1
P04591	gag	O75530	11676	VirusMentha	Human immunodeficiency virus 1
P04591	gag	P04216	11676	VirusMentha	Human immunodeficiency virus 1
P04591	gag	O00560	11676	VirusMentha	Human immunodeficiency virus 1
P04591	gag	O00763	11676	VirusMentha	Human immunodeficiency virus 1
P04591	gag	O14974	11676	VirusMentha	Human immunodeficiency virus 1
P04591	gag	O43290	11676	VirusMentha	Human immunodeficiency virus 1
P04591	gag	O60841	11676	VirusMentha	Human immunodeficiency virus 1
P04591	gag	O75534	11676	VirusMentha	Human immunodeficiency virus 1
P04591	gag	O15524	11676	VirusMentha	Human immunodeficiency virus 1
P04591	gag	O95793	11676	VirusMentha	Human immunodeficiency virus 1
Q72497	gag	P62937	11676	VirusMentha	Human immunodeficiency virus 1
Q79791	gag	P62937	11676	VirusMentha	Human immunodeficiency virus 1
P04585	gag-pol	Q9NS91	11676	VirusMentha	Human immunodeficiency virus 1
P04585	gag-pol	Q9Y2W1	11676	VirusMentha	Human immunodeficiency virus 1
P04585	gag-pol	Q13526	11676	VirusMentha	Human immunodeficiency virus 1
P04585	gag-pol	P20290	11676	VirusMentha	Human immunodeficiency virus 1
P04585	gag-pol	P61758	11676	VirusMentha	Human immunodeficiency virus 1
P04585	gag-pol	P63279	11676	VirusMentha	Human immunodeficiency virus 1
P04585	gag-pol	P05204	11676	VirusMentha	Human immunodeficiency virus 1
P04585	gag-pol	P07858	11676	VirusMentha	Human immunodeficiency virus 1
P04585	gag-pol	P08670	11676	VirusMentha	Human immunodeficiency virus 1
P04585	gag-pol	P10415	11676	VirusMentha	Human immunodeficiency virus 1
P04585	gag-pol	P12532	11676	VirusMentha	Human immunodeficiency virus 1
P04585	gag-pol	P12956	11676	VirusMentha	Human immunodeficiency virus 1
P04585	gag-pol	P13667	11676	VirusMentha	Human immunodeficiency virus 1
P04585	gag-pol	P15924	11676	VirusMentha	Human immunodeficiency virus 1
P04585	gag-pol	P16949	11676	VirusMentha	Human immunodeficiency virus 1
P04585	gag-pol	P19838	11676	VirusMentha	Human immunodeficiency virus 1
P04585	gag-pol	P22314	11676	VirusMentha	Human immunodeficiency virus 1
P04585	gag-pol	P22626	11676	VirusMentha	Human immunodeficiency virus 1
P04585	gag-pol	P22830	11676	VirusMentha	Human immunodeficiency virus 1
P04585	gag-pol	P23526	11676	VirusMentha	Human immunodeficiency virus 1
P04585	gag-pol	P31350	11676	VirusMentha	Human immunodeficiency virus 1
P04585	gag-pol	P31946	11676	VirusMentha	Human immunodeficiency virus 1
P04585	gag-pol	P32121	11676	VirusMentha	Human immunodeficiency virus 1
P04585	gag-pol	P33991	11676	VirusMentha	Human immunodeficiency virus 1
P04585	gag-pol	P33993	11676	VirusMentha	Human immunodeficiency virus 1
P04585	gag-pol	P40337	11676	VirusMentha	Human immunodeficiency virus 1
P04585	gag-pol	P43246	11676	VirusMentha	Human immunodeficiency virus 1
P04585	gag-pol	P46063	11676	VirusMentha	Human immunodeficiency virus 1
P04585	gag-pol	P49591	11676	VirusMentha	Human immunodeficiency virus 1
P04585	gag-pol	P50213	11676	VirusMentha	Human immunodeficiency virus 1
P04585	gag-pol	P55884	11676	VirusMentha	Human immunodeficiency virus 1
P04585	gag-pol	P58107	11676	VirusMentha	Human immunodeficiency virus 1
P04585	gag-pol	P60228	11676	VirusMentha	Human immunodeficiency virus 1
P04585	gag-pol	P61981	11676	VirusMentha	Human immunodeficiency virus 1
P04585	gag-pol	P62258	11676	VirusMentha	Human immunodeficiency virus 1
P04585	gag-pol	P62714	11676	VirusMentha	Human immunodeficiency virus 1
P04585	gag-pol	P62829	11676	VirusMentha	Human immunodeficiency virus 1
P04585	gag-pol	P62993	11676	VirusMentha	Human immunodeficiency virus 1
P04585	gag-pol	P63104	11676	VirusMentha	Human immunodeficiency virus 1
P04585	gag-pol	P68104	11676	VirusMentha	Human immunodeficiency virus 1
P04585	gag-pol	Q02790	11676	VirusMentha	Human immunodeficiency virus 1
P04585	gag-pol	Q02809	11676	VirusMentha	Human immunodeficiency virus 1
P04585	gag-pol	Q07820	11676	VirusMentha	Human immunodeficiency virus 1
P04585	gag-pol	Q07864	11676	VirusMentha	Human immunodeficiency virus 1
P04585	gag-pol	Q08380	11676	VirusMentha	Human immunodeficiency virus 1
P04585	gag-pol	Q12874	11676	VirusMentha	Human immunodeficiency virus 1
P04585	gag-pol	Q12948	11676	VirusMentha	Human immunodeficiency virus 1
P04585	gag-pol	Q13347	11676	VirusMentha	Human immunodeficiency virus 1
P04585	gag-pol	Q13617	11676	VirusMentha	Human immunodeficiency virus 1
P04585	gag-pol	Q14152	11676	VirusMentha	Human immunodeficiency virus 1
P04585	gag-pol	Q14566	11676	VirusMentha	Human immunodeficiency virus 1
P04585	gag-pol	Q15084	11676	VirusMentha	Human immunodeficiency virus 1
P04585	gag-pol	Q15293	11676	VirusMentha	Human immunodeficiency virus 1
P04585	gag-pol	Q2T9J0	11676	VirusMentha	Human immunodeficiency virus 1
P04585	gag-pol	Q32P44	11676	VirusMentha	Human immunodeficiency virus 1
P04585	gag-pol	Q5T4S7	11676	VirusMentha	Human immunodeficiency virus 1
P04585	gag-pol	Q69YN4	11676	VirusMentha	Human immunodeficiency virus 1
P04585	gag-pol	Q7L2H7	11676	VirusMentha	Human immunodeficiency virus 1
P04585	gag-pol	Q7Z4H3	11676	VirusMentha	Human immunodeficiency virus 1
P04585	gag-pol	Q86US8	11676	VirusMentha	Human immunodeficiency virus 1
P04585	gag-pol	Q86X55	11676	VirusMentha	Human immunodeficiency virus 1
P04585	gag-pol	Q8N163	11676	VirusMentha	Human immunodeficiency virus 1
P04585	gag-pol	Q8NEW0	11676	VirusMentha	Human immunodeficiency virus 1
P04585	gag-pol	Q8NFF5	11676	VirusMentha	Human immunodeficiency virus 1
P04585	gag-pol	Q8NFG4	11676	VirusMentha	Human immunodeficiency virus 1
P04585	gag-pol	Q8TB72	11676	VirusMentha	Human immunodeficiency virus 1
P04585	gag-pol	Q8TCU4	11676	VirusMentha	Human immunodeficiency virus 1
P04585	gag-pol	Q8TD16	11676	VirusMentha	Human immunodeficiency virus 1
P04585	gag-pol	Q8TEX9	11676	VirusMentha	Human immunodeficiency virus 1
P04585	gag-pol	Q8TF40	11676	VirusMentha	Human immunodeficiency virus 1
P04585	gag-pol	Q92805	11676	VirusMentha	Human immunodeficiency virus 1
P04585	gag-pol	Q92830	11676	VirusMentha	Human immunodeficiency virus 1
P04585	gag-pol	Q96S59	11676	VirusMentha	Human immunodeficiency virus 1
P04585	gag-pol	Q99613	11676	VirusMentha	Human immunodeficiency virus 1
P04585	gag-pol	Q99704	11676	VirusMentha	Human immunodeficiency virus 1
P04585	gag-pol	Q99996	11676	VirusMentha	Human immunodeficiency virus 1
P04585	gag-pol	Q9BRX2	11676	VirusMentha	Human immunodeficiency virus 1
P04585	gag-pol	Q9BTY7	11676	VirusMentha	Human immunodeficiency virus 1
P04585	gag-pol	Q9BU89	11676	VirusMentha	Human immunodeficiency virus 1
P04585	gag-pol	Q9BV29	11676	VirusMentha	Human immunodeficiency virus 1
P04585	gag-pol	Q9BZF3	11676	VirusMentha	Human immunodeficiency virus 1
P04585	gag-pol	Q9GZS3	11676	VirusMentha	Human immunodeficiency virus 1
P04585	gag-pol	Q9H1A4	11676	VirusMentha	Human immunodeficiency virus 1
P04585	gag-pol	Q9H3U1	11676	VirusMentha	Human immunodeficiency virus 1
P04585	gag-pol	Q9H4L5	11676	VirusMentha	Human immunodeficiency virus 1
P04585	gag-pol	Q9H583	11676	VirusMentha	Human immunodeficiency virus 1
P04585	gag-pol	Q9HBG6	11676	VirusMentha	Human immunodeficiency virus 1
P04585	gag-pol	Q9NR33	11676	VirusMentha	Human immunodeficiency virus 1
P04585	gag-pol	Q9NRF9	11676	VirusMentha	Human immunodeficiency virus 1
P04585	gag-pol	Q9NZN5	11676	VirusMentha	Human immunodeficiency virus 1
P04585	gag-pol	Q9P2R7	11676	VirusMentha	Human immunodeficiency virus 1
P04585	gag-pol	Q9UBQ5	11676	VirusMentha	Human immunodeficiency virus 1
P04585	gag-pol	Q9UER7	11676	VirusMentha	Human immunodeficiency virus 1
P04585	gag-pol	Q9UGP4	11676	VirusMentha	Human immunodeficiency virus 1
P04585	gag-pol	Q9UHF7	11676	VirusMentha	Human immunodeficiency virus 1
P04585	gag-pol	Q9UJX6	11676	VirusMentha	Human immunodeficiency virus 1
P04585	gag-pol	Q9UKK3	11676	VirusMentha	Human immunodeficiency virus 1
P04585	gag-pol	Q9UMS0	11676	VirusMentha	Human immunodeficiency virus 1
P04585	gag-pol	Q9Y262	11676	VirusMentha	Human immunodeficiency virus 1
P04585	gag-pol	Q9Y263	11676	VirusMentha	Human immunodeficiency virus 1
P04585	gag-pol	Q9Y265	11676	VirusMentha	Human immunodeficiency virus 1
P04585	gag-pol	Q9Y266	11676	VirusMentha	Human immunodeficiency virus 1
P04585	gag-pol	Q9Y3D0	11676	VirusMentha	Human immunodeficiency virus 1
P04585	gag-pol	Q7Z6Z7	11676	VirusMentha	Human immunodeficiency virus 1
P04585	gag-pol	Q09472	11676	VirusMentha	Human immunodeficiency virus 1
P04585	gag-pol	Q12824	11676	VirusMentha	Human immunodeficiency virus 1
P04585	gag-pol	O15372	11676	VirusMentha	Human immunodeficiency virus 1
P04585	gag-pol	O00303	11676	VirusMentha	Human immunodeficiency virus 1
P04585	gag-pol	O00469	11676	VirusMentha	Human immunodeficiency virus 1
P04585	gag-pol	O14745	11676	VirusMentha	Human immunodeficiency virus 1
P04585	gag-pol	O14976	11676	VirusMentha	Human immunodeficiency virus 1
P04585	gag-pol	O60232	11676	VirusMentha	Human immunodeficiency virus 1
P04585	gag-pol	O60518	11676	VirusMentha	Human immunodeficiency virus 1
P04585	gag-pol	O60610	11676	VirusMentha	Human immunodeficiency virus 1
P04585	gag-pol	O75155	11676	VirusMentha	Human immunodeficiency virus 1
P04585	gag-pol	O75821	11676	VirusMentha	Human immunodeficiency virus 1
P04585	gag-pol	O76071	11676	VirusMentha	Human immunodeficiency virus 1
P04585	gag-pol	O94916	11676	VirusMentha	Human immunodeficiency virus 1
P04585	gag-pol	O95714	11676	VirusMentha	Human immunodeficiency virus 1
P04585	gag-pol	O95793	11676	VirusMentha	Human immunodeficiency virus 1
P04585	gag-pol	O75530	11676	VirusMentha	Human immunodeficiency virus 1
P04585	gag-pol	O15371	11676	VirusMentha	Human immunodeficiency virus 1
Q76353	gag-pol	Q7Z4H3	11676	VirusMentha	Human immunodeficiency virus 1
Q76353	gag-pol	Q9H3U1	11676	VirusMentha	Human immunodeficiency virus 1
Q76353	gag-pol	Q8NEW0	11676	VirusMentha	Human immunodeficiency virus 1
Q76353	gag-pol	Q9Y3D0	11676	VirusMentha	Human immunodeficiency virus 1
Q76353	gag-pol	Q8TEX9	11676	VirusMentha	Human immunodeficiency virus 1
Q76353	gag-pol	Q9GZS3	11676	VirusMentha	Human immunodeficiency virus 1
Q76353	gag-pol	Q9P2R7	11676	VirusMentha	Human immunodeficiency virus 1
Q76353	gag-pol	Q9H583	11676	VirusMentha	Human immunodeficiency virus 1
Q76353	gag-pol	Q9Y263	11676	VirusMentha	Human immunodeficiency virus 1
Q76353	gag-pol	P31946	11676	VirusMentha	Human immunodeficiency virus 1
Q76353	gag-pol	P22314	11676	VirusMentha	Human immunodeficiency virus 1
Q76353	gag-pol	O75475	11676	VirusMentha	Human immunodeficiency virus 1
Q76353	gag-pol	O76071	11676	VirusMentha	Human immunodeficiency virus 1
Q76353	gag-pol	O00469	11676	VirusMentha	Human immunodeficiency virus 1
Q76353	gag-pol	Q02809	11676	VirusMentha	Human immunodeficiency virus 1
Q76353	gag-pol	P61981	11676	VirusMentha	Human immunodeficiency virus 1
Q76353	gag-pol	O60518	11676	VirusMentha	Human immunodeficiency virus 1
Q76353	gag-pol	O75155	11676	VirusMentha	Human immunodeficiency virus 1
Q76353	gag-pol	P12532	11676	VirusMentha	Human immunodeficiency virus 1
Q76353	gag-pol	P15924	11676	VirusMentha	Human immunodeficiency virus 1
Q76353	gag-pol	P62258	11676	VirusMentha	Human immunodeficiency virus 1
Q76353	gag-pol	P63104	11676	VirusMentha	Human immunodeficiency virus 1
Q76353	gag-pol	Q14566	11676	VirusMentha	Human immunodeficiency virus 1
Q76353	gag-pol	Q2T9J0	11676	VirusMentha	Human immunodeficiency virus 1
Q76353	gag-pol	P13667	11676	VirusMentha	Human immunodeficiency virus 1
P04601	nef	P84077	11676	VirusMentha	Human immunodeficiency virus 1
P04601	nef	P20963	11676	VirusMentha	Human immunodeficiency virus 1
P04601	nef	P12931	11676	VirusMentha	Human immunodeficiency virus 1
P04601	nef	P53618	11676	VirusMentha	Human immunodeficiency virus 1
P04601	nef	P06239	11676	VirusMentha	Human immunodeficiency virus 1
P04601	nef	P06241	11676	VirusMentha	Human immunodeficiency virus 1
P04601	nef	P07602	11676	VirusMentha	Human immunodeficiency virus 1
P04601	nef	P07947	11676	VirusMentha	Human immunodeficiency virus 1
P04601	nef	P07948	11676	VirusMentha	Human immunodeficiency virus 1
P04601	nef	P13995	11676	VirusMentha	Human immunodeficiency virus 1
P04601	nef	P16333	11676	VirusMentha	Human immunodeficiency virus 1
P04601	nef	P30419	11676	VirusMentha	Human immunodeficiency virus 1
P04601	nef	P31040	11676	VirusMentha	Human immunodeficiency virus 1
P04601	nef	P38646	11676	VirusMentha	Human immunodeficiency virus 1
P04601	nef	P41732	11676	VirusMentha	Human immunodeficiency virus 1
P04601	nef	P42771	11676	VirusMentha	Human immunodeficiency virus 1
P04601	nef	P61073	11676	VirusMentha	Human immunodeficiency virus 1
P04601	nef	P62158	11676	VirusMentha	Human immunodeficiency virus 1
P04601	nef	P78369	11676	VirusMentha	Human immunodeficiency virus 1
P04601	nef	Q13177	11676	VirusMentha	Human immunodeficiency virus 1
P04601	nef	Q13501	11676	VirusMentha	Human immunodeficiency virus 1
P04601	nef	Q14155	11676	VirusMentha	Human immunodeficiency virus 1
P04601	nef	Q15052	11676	VirusMentha	Human immunodeficiency virus 1
P04601	nef	Q15904	11676	VirusMentha	Human immunodeficiency virus 1
P04601	nef	Q6UW56	11676	VirusMentha	Human immunodeficiency virus 1
P04601	nef	Q8N0U8	11676	VirusMentha	Human immunodeficiency virus 1
P04601	nef	Q8N726	11676	VirusMentha	Human immunodeficiency virus 1
P04601	nef	Q8TEJ3	11676	VirusMentha	Human immunodeficiency virus 1
P04601	nef	Q969W9	11676	VirusMentha	Human immunodeficiency virus 1
P04601	nef	Q969X5	11676	VirusMentha	Human immunodeficiency virus 1
P04601	nef	Q96A65	11676	VirusMentha	Human immunodeficiency virus 1
P04601	nef	Q96CW1	11676	VirusMentha	Human immunodeficiency virus 1
P04601	nef	Q9BX66	11676	VirusMentha	Human immunodeficiency virus 1
P04601	nef	Q9BXS5	11676	VirusMentha	Human immunodeficiency virus 1
P04601	nef	Q9NPF0	11676	VirusMentha	Human immunodeficiency virus 1
P04601	nef	Q9NQ11	11676	VirusMentha	Human immunodeficiency virus 1
P04601	nef	Q9NX40	11676	VirusMentha	Human immunodeficiency virus 1
P04601	nef	Q9NZJ7	11676	VirusMentha	Human immunodeficiency virus 1
P04601	nef	Q9UBF6	11676	VirusMentha	Human immunodeficiency virus 1
P04601	nef	Q9Y279	11676	VirusMentha	Human immunodeficiency virus 1
P04601	nef	Q9Y2T2	11676	VirusMentha	Human immunodeficiency virus 1
P04601	nef	Q9Y4K3	11676	VirusMentha	Human immunodeficiency virus 1
P04601	nef	Q8WUM4	11676	VirusMentha	Human immunodeficiency virus 1
P04601	nef	P28070	11676	VirusMentha	Human immunodeficiency virus 1
P04601	nef	P15882	11676	VirusMentha	Human immunodeficiency virus 1
P04601	nef	P04899	11676	VirusMentha	Human immunodeficiency virus 1
P04601	nef	P05556	11676	VirusMentha	Human immunodeficiency virus 1
P04601	nef	Q15025	11676	VirusMentha	Human immunodeficiency virus 1
P04601	nef	P51572	11676	VirusMentha	Human immunodeficiency virus 1
P04601	nef	P30086	11676	VirusMentha	Human immunodeficiency virus 1
P04601	nef	Q13491	11676	VirusMentha	Human immunodeficiency virus 1
P04601	nef	P51674	11676	VirusMentha	Human immunodeficiency virus 1
P04601	nef	Q12933	11676	VirusMentha	Human immunodeficiency virus 1
P04601	nef	Q96J02	11676	VirusMentha	Human immunodeficiency virus 1
P04601	nef	Q9NXG6	11676	VirusMentha	Human immunodeficiency virus 1
P04601	nef	P08631	11676	VirusMentha	Human immunodeficiency virus 1
P04601	nef	O14734	11676	VirusMentha	Human immunodeficiency virus 1
P04601	nef	P04233	11676	VirusMentha	Human immunodeficiency virus 1
P04601	nef	O00463	11676	VirusMentha	Human immunodeficiency virus 1
P04601	nef	O15432	11676	VirusMentha	Human immunodeficiency virus 1
P04601	nef	O43505	11676	VirusMentha	Human immunodeficiency virus 1
P04601	nef	O60504	11676	VirusMentha	Human immunodeficiency virus 1
P04601	nef	O94875	11676	VirusMentha	Human immunodeficiency virus 1
P04601	nef	P01730	11676	VirusMentha	Human immunodeficiency virus 1
P04601	nef	P02786	11676	VirusMentha	Human immunodeficiency virus 1
P04601	nef	O95793	11676	VirusMentha	Human immunodeficiency virus 1
P04601	nef	O43169	11676	VirusMentha	Human immunodeficiency virus 1
P15829	nef	P53618	11676	VirusMentha	Human immunodeficiency virus 1
Q90VU7	nef	Q8TEJ3	11676	VirusMentha	Human immunodeficiency virus 1
Q90VU7	nef	P06239	11676	VirusMentha	Human immunodeficiency virus 1
Q90VU7	nef	P06241	11676	VirusMentha	Human immunodeficiency virus 1
Q90VU7	nef	P07947	11676	VirusMentha	Human immunodeficiency virus 1
Q90VU7	nef	P07948	11676	VirusMentha	Human immunodeficiency virus 1
Q90VU7	nef	P12931	11676	VirusMentha	Human immunodeficiency virus 1
Q90VU7	nef	P16333	11676	VirusMentha	Human immunodeficiency virus 1
Q90VU7	nef	Q14155	11676	VirusMentha	Human immunodeficiency virus 1
Q90VU7	nef	Q15052	11676	VirusMentha	Human immunodeficiency virus 1
Q90VU7	nef	P08631	11676	VirusMentha	Human immunodeficiency virus 1
Q9Q2G4	gag-pol	Q9UGP4	11676	VirusMentha	Human immunodeficiency virus 1
Q9Q2G4	gag-pol	Q9UKK3	11676	VirusMentha	Human immunodeficiency virus 1
Q9Q2G4	gag-pol	Q9UBQ5	11676	VirusMentha	Human immunodeficiency virus 1
Q9Q2G4	gag-pol	Q9Y262	11676	VirusMentha	Human immunodeficiency virus 1
Q9Q2G4	gag-pol	Q9UHF7	11676	VirusMentha	Human immunodeficiency virus 1
Q9Q2G4	gag-pol	Q9UMS0	11676	VirusMentha	Human immunodeficiency virus 1
Q9Q2G4	gag-pol	Q9H8Y5	11676	VirusMentha	Human immunodeficiency virus 1
Q9Q2G4	gag-pol	P33991	11676	VirusMentha	Human immunodeficiency virus 1
Q9Q2G4	gag-pol	Q12948	11676	VirusMentha	Human immunodeficiency virus 1
Q9Q2G4	gag-pol	Q14152	11676	VirusMentha	Human immunodeficiency virus 1
Q9Q2G4	gag-pol	O15372	11676	VirusMentha	Human immunodeficiency virus 1
Q9Q2G4	gag-pol	P61758	11676	VirusMentha	Human immunodeficiency virus 1
Q9Q2G4	gag-pol	O60610	11676	VirusMentha	Human immunodeficiency virus 1
Q9Q2G4	gag-pol	O14976	11676	VirusMentha	Human immunodeficiency virus 1
Q9Q2G4	gag-pol	O94916	11676	VirusMentha	Human immunodeficiency virus 1
Q9Q2G4	gag-pol	Q5T4S7	11676	VirusMentha	Human immunodeficiency virus 1
Q9Q2G4	gag-pol	Q02790	11676	VirusMentha	Human immunodeficiency virus 1
Q9Q2G4	gag-pol	Q8TD16	11676	VirusMentha	Human immunodeficiency virus 1
Q9Q2G4	gag-pol	Q9BTY7	11676	VirusMentha	Human immunodeficiency virus 1
Q9Q2G4	gag-pol	Q12874	11676	VirusMentha	Human immunodeficiency virus 1
Q9Q2G4	gag-pol	Q8N163	11676	VirusMentha	Human immunodeficiency virus 1
Q9Q2G4	gag-pol	O95714	11676	VirusMentha	Human immunodeficiency virus 1
Q9Q2G4	gag-pol	P23526	11676	VirusMentha	Human immunodeficiency virus 1
Q9Q2G4	gag-pol	P43246	11676	VirusMentha	Human immunodeficiency virus 1
Q9Q2G4	gag-pol	P49591	11676	VirusMentha	Human immunodeficiency virus 1
Q9Q2G4	gag-pol	P55884	11676	VirusMentha	Human immunodeficiency virus 1
Q9Q2G4	gag-pol	P58107	11676	VirusMentha	Human immunodeficiency virus 1
Q9Q2G4	gag-pol	Q07820	11676	VirusMentha	Human immunodeficiency virus 1
Q9Q2G4	gag-pol	Q07864	11676	VirusMentha	Human immunodeficiency virus 1
Q9Q2G4	gag-pol	Q32P44	11676	VirusMentha	Human immunodeficiency virus 1
Q9Q2G4	gag-pol	Q7L2H7	11676	VirusMentha	Human immunodeficiency virus 1
Q9Q2G4	gag-pol	Q86US8	11676	VirusMentha	Human immunodeficiency virus 1
Q9Q2G4	gag-pol	Q86X55	11676	VirusMentha	Human immunodeficiency virus 1
Q9Q2G4	gag-pol	Q8NFF5	11676	VirusMentha	Human immunodeficiency virus 1
Q9Q2G4	gag-pol	Q8NFG4	11676	VirusMentha	Human immunodeficiency virus 1
Q9Q2G4	gag-pol	Q8TCU4	11676	VirusMentha	Human immunodeficiency virus 1
Q9Q2G4	gag-pol	Q92805	11676	VirusMentha	Human immunodeficiency virus 1
Q9Q2G4	gag-pol	Q99704	11676	VirusMentha	Human immunodeficiency virus 1
Q9Q2G4	gag-pol	Q99996	11676	VirusMentha	Human immunodeficiency virus 1
Q9Q2G4	gag-pol	Q9BU89	11676	VirusMentha	Human immunodeficiency virus 1
Q9Q2G4	gag-pol	Q9H1A4	11676	VirusMentha	Human immunodeficiency virus 1
Q9Q2G4	gag-pol	Q9NR33	11676	VirusMentha	Human immunodeficiency virus 1
Q9Q2G4	gag-pol	Q9NZN5	11676	VirusMentha	Human immunodeficiency virus 1
Q9Q2G4	gag-pol	O00303	11676	VirusMentha	Human immunodeficiency virus 1
Q9Q2G4	gag-pol	O60232	11676	VirusMentha	Human immunodeficiency virus 1
Q9Q2G4	gag-pol	O15371	11676	VirusMentha	Human immunodeficiency virus 1
Q9Q2G4	gag-pol	Q9HBG6	11676	VirusMentha	Human immunodeficiency virus 1
Q9Q2G4	gag-pol	Q8TB72	11676	VirusMentha	Human immunodeficiency virus 1
Q9Q2G4	gag-pol	P32121	11676	VirusMentha	Human immunodeficiency virus 1
Q9Q2G4	gag-pol	P60228	11676	VirusMentha	Human immunodeficiency virus 1
Q9Q2G4	gag-pol	Q99613	11676	VirusMentha	Human immunodeficiency virus 1
Q9Q2G4	gag-pol	Q8TF40	11676	VirusMentha	Human immunodeficiency virus 1
Q9Q2G4	gag-pol	Q9H4L5	11676	VirusMentha	Human immunodeficiency virus 1
Q9Q2G4	gag-pol	Q9BZF3	11676	VirusMentha	Human immunodeficiency virus 1
Q9Q2G4	gag-pol	Q9NRF9	11676	VirusMentha	Human immunodeficiency virus 1
Q72547	gag-pol	P68400	11676	VirusMentha	Human immunodeficiency virus 1
P04618	rev	P05455	11676	VirusMentha	Human immunodeficiency virus 1
P04618	rev	P06748	11676	VirusMentha	Human immunodeficiency virus 1
P04618	rev	P07237	11676	VirusMentha	Human immunodeficiency virus 1
P04618	rev	P07437	11676	VirusMentha	Human immunodeficiency virus 1
P04618	rev	P07910	11676	VirusMentha	Human immunodeficiency virus 1
P04618	rev	P08621	11676	VirusMentha	Human immunodeficiency virus 1
P04618	rev	P08708	11676	VirusMentha	Human immunodeficiency virus 1
P04618	rev	P08865	11676	VirusMentha	Human immunodeficiency virus 1
P04618	rev	P09234	11676	VirusMentha	Human immunodeficiency virus 1
P04618	rev	P09651	11676	VirusMentha	Human immunodeficiency virus 1
P04618	rev	P0DN76	11676	VirusMentha	Human immunodeficiency virus 1
P04618	rev	P11940	11676	VirusMentha	Human immunodeficiency virus 1
P04618	rev	P14625	11676	VirusMentha	Human immunodeficiency virus 1
P04618	rev	P15880	11676	VirusMentha	Human immunodeficiency virus 1
P04618	rev	P16615	11676	VirusMentha	Human immunodeficiency virus 1
P04618	rev	P17844	11676	VirusMentha	Human immunodeficiency virus 1
P04618	rev	P17858	11676	VirusMentha	Human immunodeficiency virus 1
P04618	rev	P18074	11676	VirusMentha	Human immunodeficiency virus 1
P04618	rev	P18077	11676	VirusMentha	Human immunodeficiency virus 1
P04618	rev	P18621	11676	VirusMentha	Human immunodeficiency virus 1
P04618	rev	P19447	11676	VirusMentha	Human immunodeficiency virus 1
P04618	rev	P19784	11676	VirusMentha	Human immunodeficiency virus 1
P04618	rev	P20042	11676	VirusMentha	Human immunodeficiency virus 1
P04618	rev	P22626	11676	VirusMentha	Human immunodeficiency virus 1
P04618	rev	P23246	11676	VirusMentha	Human immunodeficiency virus 1
P04618	rev	P23284	11676	VirusMentha	Human immunodeficiency virus 1
P04618	rev	P27695	11676	VirusMentha	Human immunodeficiency virus 1
P04618	rev	P27797	11676	VirusMentha	Human immunodeficiency virus 1
P04618	rev	P29372	11676	VirusMentha	Human immunodeficiency virus 1
P04618	rev	P31942	11676	VirusMentha	Human immunodeficiency virus 1
P04618	rev	P31943	11676	VirusMentha	Human immunodeficiency virus 1
P04618	rev	P31948	11676	VirusMentha	Human immunodeficiency virus 1
P04618	rev	P33240	11676	VirusMentha	Human immunodeficiency virus 1
P04618	rev	P33778	11676	VirusMentha	Human immunodeficiency virus 1
P04618	rev	P35544	11676	VirusMentha	Human immunodeficiency virus 1
P04618	rev	P35637	11676	VirusMentha	Human immunodeficiency virus 1
P04618	rev	P35658	11676	VirusMentha	Human immunodeficiency virus 1
P04618	rev	P39023	11676	VirusMentha	Human immunodeficiency virus 1
P04618	rev	P39687	11676	VirusMentha	Human immunodeficiency virus 1
P04618	rev	P41091	11676	VirusMentha	Human immunodeficiency virus 1
P04618	rev	P42285	11676	VirusMentha	Human immunodeficiency virus 1
P04618	rev	P43243	11676	VirusMentha	Human immunodeficiency virus 1
P04618	rev	P46060	11676	VirusMentha	Human immunodeficiency virus 1
P04618	rev	P46063	11676	VirusMentha	Human immunodeficiency virus 1
P04618	rev	P46782	11676	VirusMentha	Human immunodeficiency virus 1
P04618	rev	P49458	11676	VirusMentha	Human immunodeficiency virus 1
P04618	rev	P49755	11676	VirusMentha	Human immunodeficiency virus 1
P04618	rev	P49916	11676	VirusMentha	Human immunodeficiency virus 1
P04618	rev	P51991	11676	VirusMentha	Human immunodeficiency virus 1
P04618	rev	P52272	11676	VirusMentha	Human immunodeficiency virus 1
P04618	rev	P52292	11676	VirusMentha	Human immunodeficiency virus 1
P04618	rev	P52294	11676	VirusMentha	Human immunodeficiency virus 1
P04618	rev	P52597	11676	VirusMentha	Human immunodeficiency virus 1
P04618	rev	P52789	11676	VirusMentha	Human immunodeficiency virus 1
P04618	rev	P52948	11676	VirusMentha	Human immunodeficiency virus 1
P04618	rev	P53999	11676	VirusMentha	Human immunodeficiency virus 1
P04618	rev	P55081	11676	VirusMentha	Human immunodeficiency virus 1
P04618	rev	P55265	11676	VirusMentha	Human immunodeficiency virus 1
P04618	rev	P55795	11676	VirusMentha	Human immunodeficiency virus 1
P04618	rev	P58876	11676	VirusMentha	Human immunodeficiency virus 1
P04618	rev	P61011	11676	VirusMentha	Human immunodeficiency virus 1
P04618	rev	P61247	11676	VirusMentha	Human immunodeficiency virus 1
P04618	rev	P61353	11676	VirusMentha	Human immunodeficiency virus 1
P04618	rev	P62266	11676	VirusMentha	Human immunodeficiency virus 1
P04618	rev	P62304	11676	VirusMentha	Human immunodeficiency virus 1
P04618	rev	P62306	11676	VirusMentha	Human immunodeficiency virus 1
P04618	rev	P62308	11676	VirusMentha	Human immunodeficiency virus 1
P04618	rev	P62701	11676	VirusMentha	Human immunodeficiency virus 1
P04618	rev	P62753	11676	VirusMentha	Human immunodeficiency virus 1
P04618	rev	P62805	11676	VirusMentha	Human immunodeficiency virus 1
P04618	rev	P62807	11676	VirusMentha	Human immunodeficiency virus 1
P04618	rev	P62826	11676	VirusMentha	Human immunodeficiency virus 1
P04618	rev	P62829	11676	VirusMentha	Human immunodeficiency virus 1
P04618	rev	P62851	11676	VirusMentha	Human immunodeficiency virus 1
P04618	rev	P62910	11676	VirusMentha	Human immunodeficiency virus 1
P04618	rev	P62979	11676	VirusMentha	Human immunodeficiency virus 1
P04618	rev	P63151	11676	VirusMentha	Human immunodeficiency virus 1
P04618	rev	P63244	11676	VirusMentha	Human immunodeficiency virus 1
P04618	rev	P67870	11676	VirusMentha	Human immunodeficiency virus 1
P04618	rev	P68104	11676	VirusMentha	Human immunodeficiency virus 1
P04618	rev	P68363	11676	VirusMentha	Human immunodeficiency virus 1
P04618	rev	P68366	11676	VirusMentha	Human immunodeficiency virus 1
P04618	rev	P68371	11676	VirusMentha	Human immunodeficiency virus 1
P04618	rev	P68400	11676	VirusMentha	Human immunodeficiency virus 1
P04618	rev	P78527	11676	VirusMentha	Human immunodeficiency virus 1
P04618	rev	P82933	11676	VirusMentha	Human immunodeficiency virus 1
P04618	rev	P84090	11676	VirusMentha	Human immunodeficiency virus 1
P04618	rev	P84243	11676	VirusMentha	Human immunodeficiency virus 1
P04618	rev	Q00839	11676	VirusMentha	Human immunodeficiency virus 1
P04618	rev	Q01081	11676	VirusMentha	Human immunodeficiency virus 1
P04618	rev	Q01082	11676	VirusMentha	Human immunodeficiency virus 1
P04618	rev	Q01813	11676	VirusMentha	Human immunodeficiency virus 1
P04618	rev	Q01844	11676	VirusMentha	Human immunodeficiency virus 1
P04618	rev	Q02809	11676	VirusMentha	Human immunodeficiency virus 1
P04618	rev	Q02878	11676	VirusMentha	Human immunodeficiency virus 1
P04618	rev	Q04837	11676	VirusMentha	Human immunodeficiency virus 1
P04618	rev	Q07666	11676	VirusMentha	Human immunodeficiency virus 1
P04618	rev	Q08211	11676	VirusMentha	Human immunodeficiency virus 1
P04618	rev	Q12874	11676	VirusMentha	Human immunodeficiency virus 1
P04618	rev	Q12905	11676	VirusMentha	Human immunodeficiency virus 1
P04618	rev	Q12906	11676	VirusMentha	Human immunodeficiency virus 1
P04618	rev	Q12996	11676	VirusMentha	Human immunodeficiency virus 1
P04618	rev	Q13123	11676	VirusMentha	Human immunodeficiency virus 1
P04618	rev	Q13242	11676	VirusMentha	Human immunodeficiency virus 1
P04618	rev	Q13347	11676	VirusMentha	Human immunodeficiency virus 1
P04618	rev	Q13509	11676	VirusMentha	Human immunodeficiency virus 1
P04618	rev	Q13523	11676	VirusMentha	Human immunodeficiency virus 1
P04618	rev	Q13619	11676	VirusMentha	Human immunodeficiency virus 1
P04618	rev	Q13885	11676	VirusMentha	Human immunodeficiency virus 1
P04618	rev	Q14103	11676	VirusMentha	Human immunodeficiency virus 1
P04618	rev	Q14204	11676	VirusMentha	Human immunodeficiency virus 1
P04618	rev	Q14444	11676	VirusMentha	Human immunodeficiency virus 1
P04618	rev	Q14498	11676	VirusMentha	Human immunodeficiency virus 1
P04618	rev	Q14690	11676	VirusMentha	Human immunodeficiency virus 1
P04618	rev	Q14974	11676	VirusMentha	Human immunodeficiency virus 1
P04618	rev	Q15024	11676	VirusMentha	Human immunodeficiency virus 1
P04618	rev	Q15165	11676	VirusMentha	Human immunodeficiency virus 1
P04618	rev	Q15185	11676	VirusMentha	Human immunodeficiency virus 1
P04618	rev	Q15233	11676	VirusMentha	Human immunodeficiency virus 1
P04618	rev	Q15424	11676	VirusMentha	Human immunodeficiency virus 1
P04618	rev	Q15428	11676	VirusMentha	Human immunodeficiency virus 1
P04618	rev	Q15459	11676	VirusMentha	Human immunodeficiency virus 1
P04618	rev	Q15645	11676	VirusMentha	Human immunodeficiency virus 1
P04618	rev	Q16531	11676	VirusMentha	Human immunodeficiency virus 1
P04618	rev	Q16630	11676	VirusMentha	Human immunodeficiency virus 1
P04618	rev	Q16778	11676	VirusMentha	Human immunodeficiency virus 1
P04618	rev	Q2TAY7	11676	VirusMentha	Human immunodeficiency virus 1
P04618	rev	Q52LJ0	11676	VirusMentha	Human immunodeficiency virus 1
P04618	rev	Q53GS9	11676	VirusMentha	Human immunodeficiency virus 1
P04618	rev	Q5QNW6	11676	VirusMentha	Human immunodeficiency virus 1
P04618	rev	Q5T4S7	11676	VirusMentha	Human immunodeficiency virus 1
P04618	rev	Q66LE6	11676	VirusMentha	Human immunodeficiency virus 1
P04618	rev	Q6KC79	11676	VirusMentha	Human immunodeficiency virus 1
P04618	rev	Q6P2Q9	11676	VirusMentha	Human immunodeficiency virus 1
P04618	rev	Q71U36	11676	VirusMentha	Human immunodeficiency virus 1
P04618	rev	Q7L2H7	11676	VirusMentha	Human immunodeficiency virus 1
P04618	rev	Q7Z2T5	11676	VirusMentha	Human immunodeficiency virus 1
P04618	rev	Q7Z6Z7	11676	VirusMentha	Human immunodeficiency virus 1
P04618	rev	Q7Z7H5	11676	VirusMentha	Human immunodeficiency virus 1
P04618	rev	Q86U38	11676	VirusMentha	Human immunodeficiency virus 1
P04618	rev	Q86W42	11676	VirusMentha	Human immunodeficiency virus 1
P04618	rev	Q86XZ4	11676	VirusMentha	Human immunodeficiency virus 1
P04618	rev	Q8N257	11676	VirusMentha	Human immunodeficiency virus 1
P04618	rev	Q8N5C6	11676	VirusMentha	Human immunodeficiency virus 1
P04618	rev	Q8N684	11676	VirusMentha	Human immunodeficiency virus 1
P04618	rev	Q8NE71	11676	VirusMentha	Human immunodeficiency virus 1
P04618	rev	Q8NI36	11676	VirusMentha	Human immunodeficiency virus 1
P04618	rev	Q8WV92	11676	VirusMentha	Human immunodeficiency virus 1
P04618	rev	Q8WWY3	11676	VirusMentha	Human immunodeficiency virus 1
P04618	rev	Q8WXF1	11676	VirusMentha	Human immunodeficiency virus 1
P04618	rev	Q92499	11676	VirusMentha	Human immunodeficiency virus 1
P04618	rev	Q92688	11676	VirusMentha	Human immunodeficiency virus 1
P04618	rev	Q92841	11676	VirusMentha	Human immunodeficiency virus 1
P04618	rev	Q92973	11676	VirusMentha	Human immunodeficiency virus 1
P04618	rev	Q92979	11676	VirusMentha	Human immunodeficiency virus 1
P04618	rev	Q93079	11676	VirusMentha	Human immunodeficiency virus 1
P04618	rev	Q96BP2	11676	VirusMentha	Human immunodeficiency virus 1
P04618	rev	Q96DI7	11676	VirusMentha	Human immunodeficiency virus 1
P04618	rev	Q96EP5	11676	VirusMentha	Human immunodeficiency virus 1
P04618	rev	Q96GM8	11676	VirusMentha	Human immunodeficiency virus 1
P04618	rev	Q96HA1	11676	VirusMentha	Human immunodeficiency virus 1
P04618	rev	Q96QR8	11676	VirusMentha	Human immunodeficiency virus 1
P04618	rev	Q96T37	11676	VirusMentha	Human immunodeficiency virus 1
P04618	rev	Q96T60	11676	VirusMentha	Human immunodeficiency virus 1
P04618	rev	Q99459	11676	VirusMentha	Human immunodeficiency virus 1
P04618	rev	Q99729	11676	VirusMentha	Human immunodeficiency virus 1
P04618	rev	Q99733	11676	VirusMentha	Human immunodeficiency virus 1
P04618	rev	Q99877	11676	VirusMentha	Human immunodeficiency virus 1
P04618	rev	Q99879	11676	VirusMentha	Human immunodeficiency virus 1
P04618	rev	Q99880	11676	VirusMentha	Human immunodeficiency virus 1
P04618	rev	Q9BQE3	11676	VirusMentha	Human immunodeficiency virus 1
P04618	rev	Q9BQG0	11676	VirusMentha	Human immunodeficiency virus 1
P04618	rev	Q9BTD8	11676	VirusMentha	Human immunodeficiency virus 1
P04618	rev	Q9BTM1	11676	VirusMentha	Human immunodeficiency virus 1
P04618	rev	Q9BTT0	11676	VirusMentha	Human immunodeficiency virus 1
P04618	rev	Q9BVA1	11676	VirusMentha	Human immunodeficiency virus 1
P04618	rev	Q9BVC5	11676	VirusMentha	Human immunodeficiency virus 1
P04618	rev	Q9BVK6	11676	VirusMentha	Human immunodeficiency virus 1
P04618	rev	Q9GZR7	11676	VirusMentha	Human immunodeficiency virus 1
P04618	rev	Q9H0S4	11676	VirusMentha	Human immunodeficiency virus 1
P04618	rev	Q9H2U1	11676	VirusMentha	Human immunodeficiency virus 1
P04618	rev	Q9HAN9	11676	VirusMentha	Human immunodeficiency virus 1
P04618	rev	Q9HCN4	11676	VirusMentha	Human immunodeficiency virus 1
P04618	rev	Q9HD23	11676	VirusMentha	Human immunodeficiency virus 1
P04618	rev	Q9NQ55	11676	VirusMentha	Human immunodeficiency virus 1
P04618	rev	Q9NQT4	11676	VirusMentha	Human immunodeficiency virus 1
P04618	rev	Q9NR30	11676	VirusMentha	Human immunodeficiency virus 1
P04618	rev	Q9NY65	11676	VirusMentha	Human immunodeficiency virus 1
P04618	rev	Q9P2I0	11676	VirusMentha	Human immunodeficiency virus 1
P04618	rev	Q9UKV3	11676	VirusMentha	Human immunodeficiency virus 1
P04618	rev	Q9UMS4	11676	VirusMentha	Human immunodeficiency virus 1
P04618	rev	Q9UNX4	11676	VirusMentha	Human immunodeficiency virus 1
P04618	rev	Q9Y224	11676	VirusMentha	Human immunodeficiency virus 1
P04618	rev	Q9Y265	11676	VirusMentha	Human immunodeficiency virus 1
P04618	rev	Q9Y2Q9	11676	VirusMentha	Human immunodeficiency virus 1
P04618	rev	Q9Y2X3	11676	VirusMentha	Human immunodeficiency virus 1
P04618	rev	Q9Y3B2	11676	VirusMentha	Human immunodeficiency virus 1
P04618	rev	Q9Y3I0	11676	VirusMentha	Human immunodeficiency virus 1
P04618	rev	Q9Y5B6	11676	VirusMentha	Human immunodeficiency virus 1
P04618	rev	Q9Y5B9	11676	VirusMentha	Human immunodeficiency virus 1
P04618	rev	Q9Y6G3	11676	VirusMentha	Human immunodeficiency virus 1
P04618	rev	P55209	11676	VirusMentha	Human immunodeficiency virus 1
P04618	rev	O14980	11676	VirusMentha	Human immunodeficiency virus 1
P04618	rev	O00571	11676	VirusMentha	Human immunodeficiency virus 1
P04618	rev	O00629	11676	VirusMentha	Human immunodeficiency virus 1
P04618	rev	O00743	11676	VirusMentha	Human immunodeficiency virus 1
P04618	rev	O14979	11676	VirusMentha	Human immunodeficiency virus 1
P04618	rev	O15504	11676	VirusMentha	Human immunodeficiency virus 1
P04618	rev	O43390	11676	VirusMentha	Human immunodeficiency virus 1
P04618	rev	O43423	11676	VirusMentha	Human immunodeficiency virus 1
P04618	rev	O43660	11676	VirusMentha	Human immunodeficiency virus 1
P04618	rev	O43776	11676	VirusMentha	Human immunodeficiency virus 1
P04618	rev	O43847	11676	VirusMentha	Human immunodeficiency virus 1
P04618	rev	O60506	11676	VirusMentha	Human immunodeficiency virus 1
P04618	rev	O60684	11676	VirusMentha	Human immunodeficiency virus 1
P04618	rev	O75037	11676	VirusMentha	Human immunodeficiency virus 1
P04618	rev	O75643	11676	VirusMentha	Human immunodeficiency virus 1
P04618	rev	O94906	11676	VirusMentha	Human immunodeficiency virus 1
P04618	rev	O95208	11676	VirusMentha	Human immunodeficiency virus 1
P04618	rev	O95373	11676	VirusMentha	Human immunodeficiency virus 1
P04618	rev	P04350	11676	VirusMentha	Human immunodeficiency virus 1
P04618	rev	P04406	11676	VirusMentha	Human immunodeficiency virus 1
P04608	tat	Q9H492	11676	VirusMentha	Human immunodeficiency virus 1
P04608	tat	Q9NTG7	11676	VirusMentha	Human immunodeficiency virus 1
P04608	tat	Q9Y5S9	11676	VirusMentha	Human immunodeficiency virus 1
P04608	tat	P78527	11676	VirusMentha	Human immunodeficiency virus 1
P04608	tat	Q15596	11676	VirusMentha	Human immunodeficiency virus 1
P04608	tat	P42771	11676	VirusMentha	Human immunodeficiency virus 1
P04608	tat	Q00987	11676	VirusMentha	Human immunodeficiency virus 1
P04608	tat	P43034	11676	VirusMentha	Human immunodeficiency virus 1
P04608	tat	P51531	11676	VirusMentha	Human immunodeficiency virus 1
P04608	tat	P51532	11676	VirusMentha	Human immunodeficiency virus 1
P04608	tat	Q13501	11676	VirusMentha	Human immunodeficiency virus 1
P04608	tat	P10827	11676	VirusMentha	Human immunodeficiency virus 1
P04608	tat	P20226	11676	VirusMentha	Human immunodeficiency virus 1
P04608	tat	P60900	11676	VirusMentha	Human immunodeficiency virus 1
P04608	tat	P62136	11676	VirusMentha	Human immunodeficiency virus 1
P04608	tat	P62191	11676	VirusMentha	Human immunodeficiency virus 1
P04608	tat	P19447	11676	VirusMentha	Human immunodeficiency virus 1
P04608	tat	P24928	11676	VirusMentha	Human immunodeficiency virus 1
P04608	tat	Q8N6T7	11676	VirusMentha	Human immunodeficiency virus 1
P04608	tat	Q8N726	11676	VirusMentha	Human immunodeficiency virus 1
P04608	tat	P63272	11676	VirusMentha	Human immunodeficiency virus 1
P04608	tat	P06493	11676	VirusMentha	Human immunodeficiency virus 1
P04608	tat	P06748	11676	VirusMentha	Human immunodeficiency virus 1
P04608	tat	P06899	11676	VirusMentha	Human immunodeficiency virus 1
P04608	tat	P0C0S5	11676	VirusMentha	Human immunodeficiency virus 1
P04608	tat	P11388	11676	VirusMentha	Human immunodeficiency virus 1
P04608	tat	P11940	11676	VirusMentha	Human immunodeficiency virus 1
P04608	tat	P13984	11676	VirusMentha	Human immunodeficiency virus 1
P04608	tat	P14859	11676	VirusMentha	Human immunodeficiency virus 1
P04608	tat	P16104	11676	VirusMentha	Human immunodeficiency virus 1
P04608	tat	P17480	11676	VirusMentha	Human immunodeficiency virus 1
P04608	tat	P17844	11676	VirusMentha	Human immunodeficiency virus 1
P04608	tat	P18074	11676	VirusMentha	Human immunodeficiency virus 1
P04608	tat	P19338	11676	VirusMentha	Human immunodeficiency virus 1
P04608	tat	P19387	11676	VirusMentha	Human immunodeficiency virus 1
P04608	tat	P19388	11676	VirusMentha	Human immunodeficiency virus 1
P04608	tat	P19838	11676	VirusMentha	Human immunodeficiency virus 1
P04608	tat	P20618	11676	VirusMentha	Human immunodeficiency virus 1
P04608	tat	P20671	11676	VirusMentha	Human immunodeficiency virus 1
P04608	tat	P20700	11676	VirusMentha	Human immunodeficiency virus 1
P04608	tat	P22087	11676	VirusMentha	Human immunodeficiency virus 1
P04608	tat	P23527	11676	VirusMentha	Human immunodeficiency virus 1
P04608	tat	P24863	11676	VirusMentha	Human immunodeficiency virus 1
P04608	tat	P25205	11676	VirusMentha	Human immunodeficiency virus 1
P04608	tat	P25440	11676	VirusMentha	Human immunodeficiency virus 1
P04608	tat	P25490	11676	VirusMentha	Human immunodeficiency virus 1
P04608	tat	P25788	11676	VirusMentha	Human immunodeficiency virus 1
P04608	tat	P25789	11676	VirusMentha	Human immunodeficiency virus 1
P04608	tat	P28062	11676	VirusMentha	Human immunodeficiency virus 1
P04608	tat	P28072	11676	VirusMentha	Human immunodeficiency virus 1
P04608	tat	P28074	11676	VirusMentha	Human immunodeficiency virus 1
P04608	tat	P29084	11676	VirusMentha	Human immunodeficiency virus 1
P04608	tat	P29692	11676	VirusMentha	Human immunodeficiency virus 1
P04608	tat	P31942	11676	VirusMentha	Human immunodeficiency virus 1
P04608	tat	P31943	11676	VirusMentha	Human immunodeficiency virus 1
P04608	tat	P33778	11676	VirusMentha	Human immunodeficiency virus 1
P04608	tat	P33993	11676	VirusMentha	Human immunodeficiency virus 1
P04608	tat	P35232	11676	VirusMentha	Human immunodeficiency virus 1
P04608	tat	P35250	11676	VirusMentha	Human immunodeficiency virus 1
P04608	tat	P35251	11676	VirusMentha	Human immunodeficiency virus 1
P04608	tat	P35556	11676	VirusMentha	Human immunodeficiency virus 1
P04608	tat	P35579	11676	VirusMentha	Human immunodeficiency virus 1
P04608	tat	P36873	11676	VirusMentha	Human immunodeficiency virus 1
P04608	tat	P36954	11676	VirusMentha	Human immunodeficiency virus 1
P04608	tat	P40306	11676	VirusMentha	Human immunodeficiency virus 1
P04608	tat	P40692	11676	VirusMentha	Human immunodeficiency virus 1
P04608	tat	P42166	11676	VirusMentha	Human immunodeficiency virus 1
P04608	tat	P42167	11676	VirusMentha	Human immunodeficiency virus 1
P04608	tat	P43243	11676	VirusMentha	Human immunodeficiency virus 1
P04608	tat	P43403	11676	VirusMentha	Human immunodeficiency virus 1
P04608	tat	P46060	11676	VirusMentha	Human immunodeficiency virus 1
P04608	tat	P46087	11676	VirusMentha	Human immunodeficiency virus 1
P04608	tat	P49336	11676	VirusMentha	Human immunodeficiency virus 1
P04608	tat	P49411	11676	VirusMentha	Human immunodeficiency virus 1
P04608	tat	P49720	11676	VirusMentha	Human immunodeficiency virus 1
P04608	tat	P49721	11676	VirusMentha	Human immunodeficiency virus 1
P04608	tat	P49790	11676	VirusMentha	Human immunodeficiency virus 1
P04608	tat	P49792	11676	VirusMentha	Human immunodeficiency virus 1
P04608	tat	P50402	11676	VirusMentha	Human immunodeficiency virus 1
P04608	tat	P51398	11676	VirusMentha	Human immunodeficiency virus 1
P04608	tat	P51784	11676	VirusMentha	Human immunodeficiency virus 1
P04608	tat	P51946	11676	VirusMentha	Human immunodeficiency virus 1
P04608	tat	P51948	11676	VirusMentha	Human immunodeficiency virus 1
P04608	tat	P52272	11676	VirusMentha	Human immunodeficiency virus 1
P04608	tat	P52292	11676	VirusMentha	Human immunodeficiency virus 1
P04608	tat	P52434	11676	VirusMentha	Human immunodeficiency virus 1
P04608	tat	P52435	11676	VirusMentha	Human immunodeficiency virus 1
P04608	tat	P52948	11676	VirusMentha	Human immunodeficiency virus 1
P04608	tat	P53350	11676	VirusMentha	Human immunodeficiency virus 1
P04608	tat	P53803	11676	VirusMentha	Human immunodeficiency virus 1
P04608	tat	P55265	11676	VirusMentha	Human immunodeficiency virus 1
P04608	tat	P55884	11676	VirusMentha	Human immunodeficiency virus 1
P04608	tat	P58876	11676	VirusMentha	Human immunodeficiency virus 1
P04608	tat	P60228	11676	VirusMentha	Human immunodeficiency virus 1
P04608	tat	P60709	11676	VirusMentha	Human immunodeficiency virus 1
P04608	tat	P61218	11676	VirusMentha	Human immunodeficiency virus 1
P04608	tat	P61964	11676	VirusMentha	Human immunodeficiency virus 1
P04608	tat	P62487	11676	VirusMentha	Human immunodeficiency virus 1
P04608	tat	P62807	11676	VirusMentha	Human immunodeficiency virus 1
P04608	tat	P62826	11676	VirusMentha	Human immunodeficiency virus 1
P04608	tat	P62875	11676	VirusMentha	Human immunodeficiency virus 1
P04608	tat	P63244	11676	VirusMentha	Human immunodeficiency virus 1
P04608	tat	P67809	11676	VirusMentha	Human immunodeficiency virus 1
P04608	tat	P68104	11676	VirusMentha	Human immunodeficiency virus 1
P04608	tat	P78346	11676	VirusMentha	Human immunodeficiency virus 1
P04608	tat	Q00403	11676	VirusMentha	Human immunodeficiency virus 1
P04608	tat	Q01196	11676	VirusMentha	Human immunodeficiency virus 1
P04608	tat	Q03111	11676	VirusMentha	Human immunodeficiency virus 1
P04608	tat	Q03164	11676	VirusMentha	Human immunodeficiency virus 1
P04608	tat	Q06945	11676	VirusMentha	Human immunodeficiency virus 1
P04608	tat	Q07021	11676	VirusMentha	Human immunodeficiency virus 1
P04608	tat	Q08945	11676	VirusMentha	Human immunodeficiency virus 1
P04608	tat	Q09028	11676	VirusMentha	Human immunodeficiency virus 1
P04608	tat	Q12788	11676	VirusMentha	Human immunodeficiency virus 1
P04608	tat	Q12905	11676	VirusMentha	Human immunodeficiency virus 1
P04608	tat	Q12906	11676	VirusMentha	Human immunodeficiency virus 1
P04608	tat	Q13049	11676	VirusMentha	Human immunodeficiency virus 1
P04608	tat	Q13330	11676	VirusMentha	Human immunodeficiency virus 1
P04608	tat	Q13422	11676	VirusMentha	Human immunodeficiency virus 1
P04608	tat	Q13547	11676	VirusMentha	Human immunodeficiency virus 1
P04608	tat	Q14103	11676	VirusMentha	Human immunodeficiency virus 1
P04608	tat	Q14152	11676	VirusMentha	Human immunodeficiency virus 1
P04608	tat	Q14191	11676	VirusMentha	Human immunodeficiency virus 1
P04608	tat	Q14498	11676	VirusMentha	Human immunodeficiency virus 1
P04608	tat	Q14527	11676	VirusMentha	Human immunodeficiency virus 1
P04608	tat	Q14566	11676	VirusMentha	Human immunodeficiency virus 1
P04608	tat	Q14739	11676	VirusMentha	Human immunodeficiency virus 1
P04608	tat	Q14807	11676	VirusMentha	Human immunodeficiency virus 1
P04608	tat	Q14839	11676	VirusMentha	Human immunodeficiency virus 1
P04608	tat	Q14966	11676	VirusMentha	Human immunodeficiency virus 1
P04608	tat	Q14974	11676	VirusMentha	Human immunodeficiency virus 1
P04608	tat	Q14980	11676	VirusMentha	Human immunodeficiency virus 1
P04608	tat	Q15003	11676	VirusMentha	Human immunodeficiency virus 1
P04608	tat	Q15021	11676	VirusMentha	Human immunodeficiency virus 1
P04608	tat	Q15022	11676	VirusMentha	Human immunodeficiency virus 1
P04608	tat	Q15059	11676	VirusMentha	Human immunodeficiency virus 1
P04608	tat	Q15393	11676	VirusMentha	Human immunodeficiency virus 1
P04608	tat	Q15397	11676	VirusMentha	Human immunodeficiency virus 1
P04608	tat	Q15637	11676	VirusMentha	Human immunodeficiency virus 1
P04608	tat	Q16576	11676	VirusMentha	Human immunodeficiency virus 1
P04608	tat	Q16695	11676	VirusMentha	Human immunodeficiency virus 1
P04608	tat	Q16777	11676	VirusMentha	Human immunodeficiency virus 1
P04608	tat	Q16778	11676	VirusMentha	Human immunodeficiency virus 1
P04608	tat	Q16891	11676	VirusMentha	Human immunodeficiency virus 1
P04608	tat	Q29RF7	11676	VirusMentha	Human immunodeficiency virus 1
P04608	tat	Q4G0J3	11676	VirusMentha	Human immunodeficiency virus 1
P04608	tat	Q53H47	11676	VirusMentha	Human immunodeficiency virus 1
P04608	tat	Q5JTV8	11676	VirusMentha	Human immunodeficiency virus 1
P04608	tat	Q5QJE6	11676	VirusMentha	Human immunodeficiency virus 1
P04608	tat	Q5SSJ5	11676	VirusMentha	Human immunodeficiency virus 1
P04608	tat	Q63HN8	11676	VirusMentha	Human immunodeficiency virus 1
P04608	tat	Q6P2E9	11676	VirusMentha	Human immunodeficiency virus 1
P04608	tat	Q6P2Q9	11676	VirusMentha	Human immunodeficiency virus 1
P04608	tat	Q71UI9	11676	VirusMentha	Human immunodeficiency virus 1
P04608	tat	Q7L2E3	11676	VirusMentha	Human immunodeficiency virus 1
P04608	tat	Q7L2J0	11676	VirusMentha	Human immunodeficiency virus 1
P04608	tat	Q7L7L0	11676	VirusMentha	Human immunodeficiency virus 1
P04608	tat	Q7Z6E9	11676	VirusMentha	Human immunodeficiency virus 1
P04608	tat	Q86U86	11676	VirusMentha	Human immunodeficiency virus 1
P04608	tat	Q86VP6	11676	VirusMentha	Human immunodeficiency virus 1
P04608	tat	Q86YP4	11676	VirusMentha	Human immunodeficiency virus 1
P04608	tat	Q8IUE6	11676	VirusMentha	Human immunodeficiency virus 1
P04608	tat	Q8N1F7	11676	VirusMentha	Human immunodeficiency virus 1
P04608	tat	Q8N7H5	11676	VirusMentha	Human immunodeficiency virus 1
P04608	tat	Q8NAF0	11676	VirusMentha	Human immunodeficiency virus 1
P04608	tat	Q8NCA5	11676	VirusMentha	Human immunodeficiency virus 1
P04608	tat	Q8TDN6	11676	VirusMentha	Human immunodeficiency virus 1
P04608	tat	Q8TDX7	11676	VirusMentha	Human immunodeficiency virus 1
P04608	tat	Q8TF68	11676	VirusMentha	Human immunodeficiency virus 1
P04608	tat	Q8WWP7	11676	VirusMentha	Human immunodeficiency virus 1
P04608	tat	Q8WXI9	11676	VirusMentha	Human immunodeficiency virus 1
P04608	tat	Q8WYP5	11676	VirusMentha	Human immunodeficiency virus 1
P04608	tat	Q92616	11676	VirusMentha	Human immunodeficiency virus 1
P04608	tat	Q92621	11676	VirusMentha	Human immunodeficiency virus 1
P04608	tat	Q92769	11676	VirusMentha	Human immunodeficiency virus 1
P04608	tat	Q92785	11676	VirusMentha	Human immunodeficiency virus 1
P04608	tat	Q92804	11676	VirusMentha	Human immunodeficiency virus 1
P04608	tat	Q92830	11676	VirusMentha	Human immunodeficiency virus 1
P04608	tat	Q92922	11676	VirusMentha	Human immunodeficiency virus 1
P04608	tat	Q93077	11676	VirusMentha	Human immunodeficiency virus 1
P04608	tat	Q93079	11676	VirusMentha	Human immunodeficiency virus 1
P04608	tat	Q96A08	11676	VirusMentha	Human immunodeficiency virus 1
P04608	tat	Q96FV9	11676	VirusMentha	Human immunodeficiency virus 1
P04608	tat	Q96GN5	11676	VirusMentha	Human immunodeficiency virus 1
P04608	tat	Q96HN2	11676	VirusMentha	Human immunodeficiency virus 1
P04608	tat	Q96I25	11676	VirusMentha	Human immunodeficiency virus 1
P04608	tat	Q96JP5	11676	VirusMentha	Human immunodeficiency virus 1
P04608	tat	Q96KK5	11676	VirusMentha	Human immunodeficiency virus 1
P04608	tat	Q96KQ7	11676	VirusMentha	Human immunodeficiency virus 1
P04608	tat	Q96L91	11676	VirusMentha	Human immunodeficiency virus 1
P04608	tat	Q96ME7	11676	VirusMentha	Human immunodeficiency virus 1
P04608	tat	Q96PK6	11676	VirusMentha	Human immunodeficiency virus 1
P04608	tat	Q96QV6	11676	VirusMentha	Human immunodeficiency virus 1
P04608	tat	Q96RJ0	11676	VirusMentha	Human immunodeficiency virus 1
P04608	tat	Q96ST3	11676	VirusMentha	Human immunodeficiency virus 1
P04608	tat	Q96T58	11676	VirusMentha	Human immunodeficiency virus 1
P04608	tat	Q99436	11676	VirusMentha	Human immunodeficiency virus 1
P04608	tat	Q99459	11676	VirusMentha	Human immunodeficiency virus 1
P04608	tat	Q99525	11676	VirusMentha	Human immunodeficiency virus 1
P04608	tat	Q99567	11676	VirusMentha	Human immunodeficiency virus 1
P04608	tat	Q99623	11676	VirusMentha	Human immunodeficiency virus 1
P04608	tat	Q99733	11676	VirusMentha	Human immunodeficiency virus 1
P04608	tat	Q99877	11676	VirusMentha	Human immunodeficiency virus 1
P04608	tat	Q99879	11676	VirusMentha	Human immunodeficiency virus 1
P04608	tat	Q99880	11676	VirusMentha	Human immunodeficiency virus 1
P04608	tat	Q9BPX3	11676	VirusMentha	Human immunodeficiency virus 1
P04608	tat	Q9BTC8	11676	VirusMentha	Human immunodeficiency virus 1
P04608	tat	Q9BVP2	11676	VirusMentha	Human immunodeficiency virus 1
P04608	tat	Q9BW27	11676	VirusMentha	Human immunodeficiency virus 1
P04608	tat	Q9BWT1	11676	VirusMentha	Human immunodeficiency virus 1
P04608	tat	Q9BZE4	11676	VirusMentha	Human immunodeficiency virus 1
P04608	tat	Q9C0C9	11676	VirusMentha	Human immunodeficiency virus 1
P04608	tat	Q9C0K0	11676	VirusMentha	Human immunodeficiency virus 1
P04608	tat	Q9H0A0	11676	VirusMentha	Human immunodeficiency virus 1
P04608	tat	Q9H307	11676	VirusMentha	Human immunodeficiency virus 1
P04608	tat	Q9H4L4	11676	VirusMentha	Human immunodeficiency virus 1
P04608	tat	Q9HAF1	11676	VirusMentha	Human immunodeficiency virus 1
P04608	tat	Q9HCK8	11676	VirusMentha	Human immunodeficiency virus 1
P04608	tat	Q9NPF5	11676	VirusMentha	Human immunodeficiency virus 1
P04608	tat	Q9NR30	11676	VirusMentha	Human immunodeficiency virus 1
P04608	tat	Q9NTI5	11676	VirusMentha	Human immunodeficiency virus 1
P04608	tat	Q9NTJ3	11676	VirusMentha	Human immunodeficiency virus 1
P04608	tat	Q9NUL3	11676	VirusMentha	Human immunodeficiency virus 1
P04608	tat	Q9NVP1	11676	VirusMentha	Human immunodeficiency virus 1
P04608	tat	Q9NXF7	11676	VirusMentha	Human immunodeficiency virus 1
P04608	tat	Q9NY61	11676	VirusMentha	Human immunodeficiency virus 1
P04608	tat	Q9NYH9	11676	VirusMentha	Human immunodeficiency virus 1
P04608	tat	Q9P0M6	11676	VirusMentha	Human immunodeficiency virus 1
P04608	tat	Q9P0U4	11676	VirusMentha	Human immunodeficiency virus 1
P04608	tat	Q9P2K5	11676	VirusMentha	Human immunodeficiency virus 1
P04608	tat	Q9UBB5	11676	VirusMentha	Human immunodeficiency virus 1
P04608	tat	Q9UHB7	11676	VirusMentha	Human immunodeficiency virus 1
P04608	tat	Q9UIG0	11676	VirusMentha	Human immunodeficiency virus 1
P04608	tat	Q9UJX3	11676	VirusMentha	Human immunodeficiency virus 1
P04608	tat	Q9UK99	11676	VirusMentha	Human immunodeficiency virus 1
P04608	tat	Q9UKN8	11676	VirusMentha	Human immunodeficiency virus 1
P04608	tat	Q9UKV3	11676	VirusMentha	Human immunodeficiency virus 1
P04608	tat	Q9UMR2	11676	VirusMentha	Human immunodeficiency virus 1
P04608	tat	Q9UNQ2	11676	VirusMentha	Human immunodeficiency virus 1
P04608	tat	Q9UQ35	11676	VirusMentha	Human immunodeficiency virus 1
P04608	tat	Q9UQE7	11676	VirusMentha	Human immunodeficiency virus 1
P04608	tat	Q9Y230	11676	VirusMentha	Human immunodeficiency virus 1
P04608	tat	Q9Y252	11676	VirusMentha	Human immunodeficiency virus 1
P04608	tat	Q9Y265	11676	VirusMentha	Human immunodeficiency virus 1
P04608	tat	Q9Y2X3	11676	VirusMentha	Human immunodeficiency virus 1
P04608	tat	Q9Y383	11676	VirusMentha	Human immunodeficiency virus 1
P04608	tat	Q9Y4A5	11676	VirusMentha	Human immunodeficiency virus 1
P04608	tat	Q9Y5B9	11676	VirusMentha	Human immunodeficiency virus 1
P04608	tat	Q9Y5Q8	11676	VirusMentha	Human immunodeficiency virus 1
P04608	tat	Q9Y6E2	11676	VirusMentha	Human immunodeficiency virus 1
P04608	tat	Q9Y6G9	11676	VirusMentha	Human immunodeficiency virus 1
P04608	tat	P04637	11676	VirusMentha	Human immunodeficiency virus 1
P04608	tat	Q8IXJ6	11676	VirusMentha	Human immunodeficiency virus 1
P04608	tat	Q96EB6	11676	VirusMentha	Human immunodeficiency virus 1
P04608	tat	Q9P1T7	11676	VirusMentha	Human immunodeficiency virus 1
P04608	tat	P50613	11676	VirusMentha	Human immunodeficiency virus 1
P04608	tat	Q8TAQ2	11676	VirusMentha	Human immunodeficiency virus 1
P04608	tat	P29083	11676	VirusMentha	Human immunodeficiency virus 1
P04608	tat	P10145	11676	VirusMentha	Human immunodeficiency virus 1
P04608	tat	P10914	11676	VirusMentha	Human immunodeficiency virus 1
P04608	tat	P30876	11676	VirusMentha	Human immunodeficiency virus 1
P04608	tat	P32780	11676	VirusMentha	Human immunodeficiency virus 1
P04608	tat	P51825	11676	VirusMentha	Human immunodeficiency virus 1
P04608	tat	Q15047	11676	VirusMentha	Human immunodeficiency virus 1
P04608	tat	Q92993	11676	VirusMentha	Human immunodeficiency virus 1
P04608	tat	Q96T68	11676	VirusMentha	Human immunodeficiency virus 1
P04608	tat	Q01826	11676	VirusMentha	Human immunodeficiency virus 1
P04608	tat	P35269	11676	VirusMentha	Human immunodeficiency virus 1
P04608	tat	Q92793	11676	VirusMentha	Human immunodeficiency virus 1
P04608	tat	Q92831	11676	VirusMentha	Human immunodeficiency virus 1
P04608	tat	Q12824	11676	VirusMentha	Human immunodeficiency virus 1
P04608	tat	P08047	11676	VirusMentha	Human immunodeficiency virus 1
P04608	tat	Q09472	11676	VirusMentha	Human immunodeficiency virus 1
P04608	tat	O00267	11676	VirusMentha	Human immunodeficiency virus 1
P04608	tat	O15350	11676	VirusMentha	Human immunodeficiency virus 1
P04608	tat	O00257	11676	VirusMentha	Human immunodeficiency virus 1
P04608	tat	O00303	11676	VirusMentha	Human immunodeficiency virus 1
P04608	tat	O00422	11676	VirusMentha	Human immunodeficiency virus 1
P04608	tat	O00541	11676	VirusMentha	Human immunodeficiency virus 1
P04608	tat	O00567	11676	VirusMentha	Human immunodeficiency virus 1
P04608	tat	O00571	11676	VirusMentha	Human immunodeficiency virus 1
P04608	tat	O14497	11676	VirusMentha	Human immunodeficiency virus 1
P04608	tat	O14818	11676	VirusMentha	Human immunodeficiency virus 1
P04608	tat	O14980	11676	VirusMentha	Human immunodeficiency virus 1
P04608	tat	O14981	11676	VirusMentha	Human immunodeficiency virus 1
P04608	tat	O15047	11676	VirusMentha	Human immunodeficiency virus 1
P04608	tat	O15355	11676	VirusMentha	Human immunodeficiency virus 1
P04608	tat	O15514	11676	VirusMentha	Human immunodeficiency virus 1
P04608	tat	O43143	11676	VirusMentha	Human immunodeficiency virus 1
P04608	tat	O43463	11676	VirusMentha	Human immunodeficiency virus 1
P04608	tat	O43865	11676	VirusMentha	Human immunodeficiency virus 1
P04608	tat	O43913	11676	VirusMentha	Human immunodeficiency virus 1
P04608	tat	O43929	11676	VirusMentha	Human immunodeficiency virus 1
P04608	tat	O60264	11676	VirusMentha	Human immunodeficiency virus 1
P04608	tat	O60814	11676	VirusMentha	Human immunodeficiency virus 1
P04608	tat	O75367	11676	VirusMentha	Human immunodeficiency virus 1
P04608	tat	O75478	11676	VirusMentha	Human immunodeficiency virus 1
P04608	tat	O75529	11676	VirusMentha	Human immunodeficiency virus 1
P04608	tat	O75533	11676	VirusMentha	Human immunodeficiency virus 1
P04608	tat	O75607	11676	VirusMentha	Human immunodeficiency virus 1
P04608	tat	O75643	11676	VirusMentha	Human immunodeficiency virus 1
P04608	tat	O94776	11676	VirusMentha	Human immunodeficiency virus 1
P04608	tat	O95067	11676	VirusMentha	Human immunodeficiency virus 1
P04608	tat	O95232	11676	VirusMentha	Human immunodeficiency virus 1
P04608	tat	O95251	11676	VirusMentha	Human immunodeficiency virus 1
P04608	tat	O95347	11676	VirusMentha	Human immunodeficiency virus 1
P04608	tat	O95365	11676	VirusMentha	Human immunodeficiency virus 1
P04608	tat	O95619	11676	VirusMentha	Human immunodeficiency virus 1
P04608	tat	O95983	11676	VirusMentha	Human immunodeficiency virus 1
P04608	tat	O96019	11676	VirusMentha	Human immunodeficiency virus 1
P04608	tat	O96028	11676	VirusMentha	Human immunodeficiency virus 1
Q900A7	tat	P08107	11676	VirusMentha	Human immunodeficiency virus 1
P69720	vif	Q99683	11676	VirusMentha	Human immunodeficiency virus 1
P69720	vif	Q96J02	11676	VirusMentha	Human immunodeficiency virus 1
P69720	vif	Q9NRW3	11676	VirusMentha	Human immunodeficiency virus 1
P69720	vif	Q00987	11676	VirusMentha	Human immunodeficiency virus 1
P69720	vif	Q16659	11676	VirusMentha	Human immunodeficiency virus 1
P69720	vif	Q00839	11676	VirusMentha	Human immunodeficiency virus 1
P69720	vif	Q16531	11676	VirusMentha	Human immunodeficiency virus 1
P69720	vif	Q08211	11676	VirusMentha	Human immunodeficiency virus 1
P69720	vif	Q01196	11676	VirusMentha	Human immunodeficiency virus 1
P69720	vif	Q9C0C7	11676	VirusMentha	Human immunodeficiency virus 1
P69720	vif	Q7Z6Z7	11676	VirusMentha	Human immunodeficiency virus 1
P69720	vif	Q86VP6	11676	VirusMentha	Human immunodeficiency virus 1
P69720	vif	Q9BZK7	11676	VirusMentha	Human immunodeficiency virus 1
P69720	vif	Q99615	11676	VirusMentha	Human immunodeficiency virus 1
P69720	vif	Q9Y5V3	11676	VirusMentha	Human immunodeficiency virus 1
P69720	vif	Q9GZX7	11676	VirusMentha	Human immunodeficiency virus 1
P69720	vif	Q9NR30	11676	VirusMentha	Human immunodeficiency virus 1
P69720	vif	Q9Y4B6	11676	VirusMentha	Human immunodeficiency virus 1
P69720	vif	Q9UMS4	11676	VirusMentha	Human immunodeficiency virus 1
P69720	vif	Q9ULX6	11676	VirusMentha	Human immunodeficiency virus 1
P69720	vif	Q9UBF6	11676	VirusMentha	Human immunodeficiency virus 1
P69720	vif	Q9UBN7	11676	VirusMentha	Human immunodeficiency virus 1
P69720	vif	Q969M7	11676	VirusMentha	Human immunodeficiency virus 1
P69720	vif	Q9NWF9	11676	VirusMentha	Human immunodeficiency virus 1
P69720	vif	Q13227	11676	VirusMentha	Human immunodeficiency virus 1
P69720	vif	Q13501	11676	VirusMentha	Human immunodeficiency virus 1
P69720	vif	Q13617	11676	VirusMentha	Human immunodeficiency virus 1
P69720	vif	Q8IWV8	11676	VirusMentha	Human immunodeficiency virus 1
P69720	vif	Q8TEB1	11676	VirusMentha	Human immunodeficiency virus 1
P69720	vif	Q9UNE7	11676	VirusMentha	Human immunodeficiency virus 1
P69720	vif	Q13951	11676	VirusMentha	Human immunodeficiency virus 1
P69720	vif	Q15370	11676	VirusMentha	Human immunodeficiency virus 1
P69720	vif	Q8IUX4	11676	VirusMentha	Human immunodeficiency virus 1
P69720	vif	Q15369	11676	VirusMentha	Human immunodeficiency virus 1
P69720	vif	Q93034	11676	VirusMentha	Human immunodeficiency virus 1
P69720	vif	Q9HC16	11676	VirusMentha	Human immunodeficiency virus 1
P69720	vif	P28482	11676	VirusMentha	Human immunodeficiency virus 1
P69720	vif	P34932	11676	VirusMentha	Human immunodeficiency virus 1
P69720	vif	P46379	11676	VirusMentha	Human immunodeficiency virus 1
P69720	vif	P25686	11676	VirusMentha	Human immunodeficiency virus 1
P69720	vif	P21673	11676	VirusMentha	Human immunodeficiency virus 1
P69720	vif	P14866	11676	VirusMentha	Human immunodeficiency virus 1
P69720	vif	P04637	11676	VirusMentha	Human immunodeficiency virus 1
P69720	vif	O75376	11676	VirusMentha	Human immunodeficiency virus 1
P69720	vif	O60885	11676	VirusMentha	Human immunodeficiency virus 1
P69720	vif	P62877	11676	VirusMentha	Human immunodeficiency virus 1
P69720	vif	P50750	11676	VirusMentha	Human immunodeficiency virus 1
P69720	vif	P46934	11676	VirusMentha	Human immunodeficiency virus 1
P69720	vif	O15379	11676	VirusMentha	Human immunodeficiency virus 1
P69720	vif	P0CG48	11676	VirusMentha	Human immunodeficiency virus 1
P69720	vif	P11441	11676	VirusMentha	Human immunodeficiency virus 1
P69720	vif	P26196	11676	VirusMentha	Human immunodeficiency virus 1
P69720	vif	P61289	11676	VirusMentha	Human immunodeficiency virus 1
P69721	vif	Q99683	11676	VirusMentha	Human immunodeficiency virus 1
P69721	vif	Q96J02	11676	VirusMentha	Human immunodeficiency virus 1
P69721	vif	Q9NRW3	11676	VirusMentha	Human immunodeficiency virus 1
P69721	vif	Q9Y4B6	11676	VirusMentha	Human immunodeficiency virus 1
P69721	vif	Q00839	11676	VirusMentha	Human immunodeficiency virus 1
P69721	vif	Q08211	11676	VirusMentha	Human immunodeficiency virus 1
P69721	vif	Q00987	11676	VirusMentha	Human immunodeficiency virus 1
P69721	vif	Q01196	11676	VirusMentha	Human immunodeficiency virus 1
P69721	vif	Q9UMS4	11676	VirusMentha	Human immunodeficiency virus 1
P69721	vif	Q16659	11676	VirusMentha	Human immunodeficiency virus 1
P69721	vif	Q16531	11676	VirusMentha	Human immunodeficiency virus 1
P69721	vif	Q7Z6Z7	11676	VirusMentha	Human immunodeficiency virus 1
P69721	vif	Q86VP6	11676	VirusMentha	Human immunodeficiency virus 1
P69721	vif	Q9C0C7	11676	VirusMentha	Human immunodeficiency virus 1
P69721	vif	Q99615	11676	VirusMentha	Human immunodeficiency virus 1
P69721	vif	Q9BZK7	11676	VirusMentha	Human immunodeficiency virus 1
P69721	vif	Q9ULX6	11676	VirusMentha	Human immunodeficiency virus 1
P69721	vif	Q9GZX7	11676	VirusMentha	Human immunodeficiency virus 1
P69721	vif	Q9NR30	11676	VirusMentha	Human immunodeficiency virus 1
P69721	vif	Q9Y5V3	11676	VirusMentha	Human immunodeficiency virus 1
P69721	vif	Q9UBF6	11676	VirusMentha	Human immunodeficiency virus 1
P69721	vif	Q9UBN7	11676	VirusMentha	Human immunodeficiency virus 1
P69721	vif	Q969M7	11676	VirusMentha	Human immunodeficiency virus 1
P69721	vif	Q9NWF9	11676	VirusMentha	Human immunodeficiency virus 1
P69721	vif	Q13227	11676	VirusMentha	Human immunodeficiency virus 1
P69721	vif	Q13501	11676	VirusMentha	Human immunodeficiency virus 1
P69721	vif	Q13617	11676	VirusMentha	Human immunodeficiency virus 1
P69721	vif	Q8IWV8	11676	VirusMentha	Human immunodeficiency virus 1
P69721	vif	Q8TEB1	11676	VirusMentha	Human immunodeficiency virus 1
P69721	vif	Q9UNE7	11676	VirusMentha	Human immunodeficiency virus 1
P69721	vif	Q13951	11676	VirusMentha	Human immunodeficiency virus 1
P69721	vif	Q15370	11676	VirusMentha	Human immunodeficiency virus 1
P69721	vif	Q8IUX4	11676	VirusMentha	Human immunodeficiency virus 1
P69721	vif	Q15369	11676	VirusMentha	Human immunodeficiency virus 1
P69721	vif	Q93034	11676	VirusMentha	Human immunodeficiency virus 1
P69721	vif	Q9HC16	11676	VirusMentha	Human immunodeficiency virus 1
P69721	vif	P28482	11676	VirusMentha	Human immunodeficiency virus 1
P69721	vif	P34932	11676	VirusMentha	Human immunodeficiency virus 1
P69721	vif	O60885	11676	VirusMentha	Human immunodeficiency virus 1
P69721	vif	P50750	11676	VirusMentha	Human immunodeficiency virus 1
P69721	vif	P14866	11676	VirusMentha	Human immunodeficiency virus 1
P69721	vif	O75376	11676	VirusMentha	Human immunodeficiency virus 1
P69721	vif	P04637	11676	VirusMentha	Human immunodeficiency virus 1
P69721	vif	P46379	11676	VirusMentha	Human immunodeficiency virus 1
P69721	vif	P21673	11676	VirusMentha	Human immunodeficiency virus 1
P69721	vif	P25686	11676	VirusMentha	Human immunodeficiency virus 1
P69721	vif	P62877	11676	VirusMentha	Human immunodeficiency virus 1
P69721	vif	P46934	11676	VirusMentha	Human immunodeficiency virus 1
P69721	vif	O15379	11676	VirusMentha	Human immunodeficiency virus 1
P69721	vif	P0CG48	11676	VirusMentha	Human immunodeficiency virus 1
P69721	vif	P11441	11676	VirusMentha	Human immunodeficiency virus 1
P69721	vif	P26196	11676	VirusMentha	Human immunodeficiency virus 1
P69721	vif	P61289	11676	VirusMentha	Human immunodeficiency virus 1
P69722	vif	Q99683	11676	VirusMentha	Human immunodeficiency virus 1
P69722	vif	Q96J02	11676	VirusMentha	Human immunodeficiency virus 1
P69722	vif	Q9NRW3	11676	VirusMentha	Human immunodeficiency virus 1
P69722	vif	Q9NR30	11676	VirusMentha	Human immunodeficiency virus 1
P69722	vif	Q00987	11676	VirusMentha	Human immunodeficiency virus 1
P69722	vif	Q01196	11676	VirusMentha	Human immunodeficiency virus 1
P69722	vif	Q00839	11676	VirusMentha	Human immunodeficiency virus 1
P69722	vif	Q08211	11676	VirusMentha	Human immunodeficiency virus 1
P69722	vif	Q7Z6Z7	11676	VirusMentha	Human immunodeficiency virus 1
P69722	vif	Q16659	11676	VirusMentha	Human immunodeficiency virus 1
P69722	vif	Q16531	11676	VirusMentha	Human immunodeficiency virus 1
P69722	vif	Q86VP6	11676	VirusMentha	Human immunodeficiency virus 1
P69722	vif	Q9GZX7	11676	VirusMentha	Human immunodeficiency virus 1
P69722	vif	Q9C0C7	11676	VirusMentha	Human immunodeficiency virus 1
P69722	vif	Q99615	11676	VirusMentha	Human immunodeficiency virus 1
P69722	vif	Q9BZK7	11676	VirusMentha	Human immunodeficiency virus 1
P69722	vif	Q9UMS4	11676	VirusMentha	Human immunodeficiency virus 1
P69722	vif	Q9ULX6	11676	VirusMentha	Human immunodeficiency virus 1
P69722	vif	Q9Y4B6	11676	VirusMentha	Human immunodeficiency virus 1
P69722	vif	Q9Y5V3	11676	VirusMentha	Human immunodeficiency virus 1
P69722	vif	Q9UBF6	11676	VirusMentha	Human immunodeficiency virus 1
P69722	vif	Q9UBN7	11676	VirusMentha	Human immunodeficiency virus 1
P69722	vif	Q969M7	11676	VirusMentha	Human immunodeficiency virus 1
P69722	vif	Q9NWF9	11676	VirusMentha	Human immunodeficiency virus 1
P69722	vif	Q13227	11676	VirusMentha	Human immunodeficiency virus 1
P69722	vif	Q13501	11676	VirusMentha	Human immunodeficiency virus 1
P69722	vif	Q13617	11676	VirusMentha	Human immunodeficiency virus 1
P69722	vif	Q8IWV8	11676	VirusMentha	Human immunodeficiency virus 1
P69722	vif	Q8TEB1	11676	VirusMentha	Human immunodeficiency virus 1
P69722	vif	Q9UNE7	11676	VirusMentha	Human immunodeficiency virus 1
P69722	vif	Q13951	11676	VirusMentha	Human immunodeficiency virus 1
P69722	vif	Q15370	11676	VirusMentha	Human immunodeficiency virus 1
P69722	vif	Q8IUX4	11676	VirusMentha	Human immunodeficiency virus 1
P69722	vif	Q15369	11676	VirusMentha	Human immunodeficiency virus 1
P69722	vif	Q93034	11676	VirusMentha	Human immunodeficiency virus 1
P69722	vif	Q9HC16	11676	VirusMentha	Human immunodeficiency virus 1
P69722	vif	P28482	11676	VirusMentha	Human immunodeficiency virus 1
P69722	vif	P34932	11676	VirusMentha	Human immunodeficiency virus 1
P69722	vif	P25686	11676	VirusMentha	Human immunodeficiency virus 1
P69722	vif	O75376	11676	VirusMentha	Human immunodeficiency virus 1
P69722	vif	O60885	11676	VirusMentha	Human immunodeficiency virus 1
P69722	vif	P21673	11676	VirusMentha	Human immunodeficiency virus 1
P69722	vif	P04637	11676	VirusMentha	Human immunodeficiency virus 1
P69722	vif	P14866	11676	VirusMentha	Human immunodeficiency virus 1
P69722	vif	P46379	11676	VirusMentha	Human immunodeficiency virus 1
P69722	vif	P50750	11676	VirusMentha	Human immunodeficiency virus 1
P69722	vif	P62877	11676	VirusMentha	Human immunodeficiency virus 1
P69722	vif	P46934	11676	VirusMentha	Human immunodeficiency virus 1
P69722	vif	O15379	11676	VirusMentha	Human immunodeficiency virus 1
P69722	vif	P0CG48	11676	VirusMentha	Human immunodeficiency virus 1
P69722	vif	P11441	11676	VirusMentha	Human immunodeficiency virus 1
P69722	vif	P26196	11676	VirusMentha	Human immunodeficiency virus 1
P69722	vif	P61289	11676	VirusMentha	Human immunodeficiency virus 1
P69723	vif	Q99683	11676	VirusMentha	Human immunodeficiency virus 1
P69723	vif	Q96J02	11676	VirusMentha	Human immunodeficiency virus 1
P69723	vif	Q9NRW3	11676	VirusMentha	Human immunodeficiency virus 1
P69723	vif	Q9GZX7	11676	VirusMentha	Human immunodeficiency virus 1
P69723	vif	Q9C0C7	11676	VirusMentha	Human immunodeficiency virus 1
P69723	vif	Q9BZK7	11676	VirusMentha	Human immunodeficiency virus 1
P69723	vif	Q00987	11676	VirusMentha	Human immunodeficiency virus 1
P69723	vif	Q00839	11676	VirusMentha	Human immunodeficiency virus 1
P69723	vif	Q99615	11676	VirusMentha	Human immunodeficiency virus 1
P69723	vif	Q01196	11676	VirusMentha	Human immunodeficiency virus 1
P69723	vif	Q08211	11676	VirusMentha	Human immunodeficiency virus 1
P69723	vif	Q16659	11676	VirusMentha	Human immunodeficiency virus 1
P69723	vif	Q16531	11676	VirusMentha	Human immunodeficiency virus 1
P69723	vif	Q7Z6Z7	11676	VirusMentha	Human immunodeficiency virus 1
P69723	vif	Q86VP6	11676	VirusMentha	Human immunodeficiency virus 1
P69723	vif	Q9NR30	11676	VirusMentha	Human immunodeficiency virus 1
P69723	vif	Q9Y4B6	11676	VirusMentha	Human immunodeficiency virus 1
P69723	vif	Q9UMS4	11676	VirusMentha	Human immunodeficiency virus 1
P69723	vif	Q9ULX6	11676	VirusMentha	Human immunodeficiency virus 1
P69723	vif	Q9Y5V3	11676	VirusMentha	Human immunodeficiency virus 1
P69723	vif	Q9UBF6	11676	VirusMentha	Human immunodeficiency virus 1
P69723	vif	Q9UBN7	11676	VirusMentha	Human immunodeficiency virus 1
P69723	vif	Q969M7	11676	VirusMentha	Human immunodeficiency virus 1
P69723	vif	Q9NWF9	11676	VirusMentha	Human immunodeficiency virus 1
P69723	vif	Q13227	11676	VirusMentha	Human immunodeficiency virus 1
P69723	vif	Q13501	11676	VirusMentha	Human immunodeficiency virus 1
P69723	vif	Q13617	11676	VirusMentha	Human immunodeficiency virus 1
P69723	vif	Q8IWV8	11676	VirusMentha	Human immunodeficiency virus 1
P69723	vif	Q8TEB1	11676	VirusMentha	Human immunodeficiency virus 1
P69723	vif	Q9UNE7	11676	VirusMentha	Human immunodeficiency virus 1
P69723	vif	Q13951	11676	VirusMentha	Human immunodeficiency virus 1
P69723	vif	Q15370	11676	VirusMentha	Human immunodeficiency virus 1
P69723	vif	Q8IUX4	11676	VirusMentha	Human immunodeficiency virus 1
P69723	vif	Q15369	11676	VirusMentha	Human immunodeficiency virus 1
P69723	vif	Q93034	11676	VirusMentha	Human immunodeficiency virus 1
P69723	vif	Q9HC16	11676	VirusMentha	Human immunodeficiency virus 1
P69723	vif	P28482	11676	VirusMentha	Human immunodeficiency virus 1
P69723	vif	P34932	11676	VirusMentha	Human immunodeficiency virus 1
P69723	vif	O75376	11676	VirusMentha	Human immunodeficiency virus 1
P69723	vif	O60885	11676	VirusMentha	Human immunodeficiency virus 1
P69723	vif	P62877	11676	VirusMentha	Human immunodeficiency virus 1
P69723	vif	P21673	11676	VirusMentha	Human immunodeficiency virus 1
P69723	vif	P04637	11676	VirusMentha	Human immunodeficiency virus 1
P69723	vif	P14866	11676	VirusMentha	Human immunodeficiency virus 1
P69723	vif	P50750	11676	VirusMentha	Human immunodeficiency virus 1
P69723	vif	P25686	11676	VirusMentha	Human immunodeficiency virus 1
P69723	vif	P46379	11676	VirusMentha	Human immunodeficiency virus 1
P69723	vif	P46934	11676	VirusMentha	Human immunodeficiency virus 1
P69723	vif	O15379	11676	VirusMentha	Human immunodeficiency virus 1
P69723	vif	P0CG48	11676	VirusMentha	Human immunodeficiency virus 1
P69723	vif	P11441	11676	VirusMentha	Human immunodeficiency virus 1
P69723	vif	P26196	11676	VirusMentha	Human immunodeficiency virus 1
P69723	vif	P61289	11676	VirusMentha	Human immunodeficiency virus 1
Q77YG0	vif	Q9HC16	11676	VirusMentha	Human immunodeficiency virus 1
O09528	vpu	P01730	11676	VirusMentha	Human immunodeficiency virus 1
O09528	vpu	Q9Y297	11676	VirusMentha	Human immunodeficiency virus 1
Q9WIP8	nef	P15311	11676	PHISTO	Human immunodeficiency virus 1
Q6JN72	tat	P28799	11676	PHISTO	Human immunodeficiency virus 1
P88761	gag	P62937	11676	PHISTO	Human immunodeficiency virus 1
P88585	gag	P62937	11676	PHISTO	Human immunodeficiency virus 1
Q77YG1	gag	P23284	11676	PHISTO	Human immunodeficiency virus 1
Q77YG1	gag	Q15046	11676	PHISTO	Human immunodeficiency virus 1
Q77YG0	vif	Q93034	11676	PHISTO	Human immunodeficiency virus 1
Q77YG0	vif	P0CG48	11676	PHISTO	Human immunodeficiency virus 1
Q77YG1	gag	P63261	11676	PHISTO	Human immunodeficiency virus 1
B9A2Q4	gag	Q15025	11676	PHISTO	Human immunodeficiency virus 1
Q77YG1	gag	P62937	11676	PHISTO	Human immunodeficiency virus 1
Q77YG1	gag	O95239	11676	PHISTO	Human immunodeficiency virus 1
Q77YG1	gag	O14617	11676	PHISTO	Human immunodeficiency virus 1
B9A2Q4	gag	O75530	11676	PHISTO	Human immunodeficiency virus 1
Q77YG1	gag	O75530	11676	PHISTO	Human immunodeficiency virus 1
Q77YG1	gag	P0CG47	11676	PHISTO	Human immunodeficiency virus 1
Q77YG0	vif	P08631	11676	PHISTO	Human immunodeficiency virus 1
B9A2Q4	gag	P52292	11676	PHISTO	Human immunodeficiency virus 1
Q77YG0	vif	P62937	11676	PHISTO	Human immunodeficiency virus 1
Q77YG1	gag	O43765	11676	PHISTO	Human immunodeficiency virus 1
Q77YG1	gag	P60709	11676	PHISTO	Human immunodeficiency virus 1
Q77YG1	gag	Q99816	11676	PHISTO	Human immunodeficiency virus 1
Q77YG1	gag	O15205	11676	PHISTO	Human immunodeficiency virus 1
B9A2Q4	gag	P68104	11676	PHISTO	Human immunodeficiency virus 1
Q77YG1	gag	P68104	11676	PHISTO	Human immunodeficiency virus 1
Q77YG1	gag	P0CG48	11676	PHISTO	Human immunodeficiency virus 1
Q77YG0	vif	Q15370	11676	PHISTO	Human immunodeficiency virus 1
Q77YG0	vif	P26196	11676	PHISTO	Human immunodeficiency virus 1
B0FAM1	env	Q03135	11676	PHISTO	Human immunodeficiency virus 1
B9A2Q4	gag	O60841	11676	PHISTO	Human immunodeficiency virus 1
Q77YG0	vif	Q15369	11676	PHISTO	Human immunodeficiency virus 1
Q77YG1	gag	O15524	11676	PHISTO	Human immunodeficiency virus 1
Q77YG0	vif	Q9HC16	11676	PHISTO	Human immunodeficiency virus 1
Q71B31	gag	P62937	11676	PHISTO	Human immunodeficiency virus 1
Q71B32	gag	P62937	11676	PHISTO	Human immunodeficiency virus 1
Q71B33	gag	P62937	11676	PHISTO	Human immunodeficiency virus 1
Q71B34	gag	P62937	11676	PHISTO	Human immunodeficiency virus 1
Q71B36	gag	P62937	11676	PHISTO	Human immunodeficiency virus 1
Q71B38	gag	P62937	11676	PHISTO	Human immunodeficiency virus 1
Q71B39	gag	P62937	11676	PHISTO	Human immunodeficiency virus 1
O09528	vpu	Q9Y297	11676	PHISTO	Human immunodeficiency virus 1
Q72499	vif	P21673	11676	PHISTO	Human immunodeficiency virus 1
Q77YG0	vif	Q13342	11676	PHISTO	Human immunodeficiency virus 1
B9A2Q4	gag	P49590	11676	PHISTO	Human immunodeficiency virus 1
Q77YG0	vif	P21673	11676	PHISTO	Human immunodeficiency virus 1
Q71B31	gag	P23284	11676	PHISTO	Human immunodeficiency virus 1
B9A2Q4	gag	O00505	11676	PHISTO	Human immunodeficiency virus 1
B9A2Q4	gag	O00629	11676	PHISTO	Human immunodeficiency virus 1
Q77YG0	vif	P12956	11676	PHISTO	Human immunodeficiency virus 1
Q77YG0	vif	P08670	11676	PHISTO	Human immunodeficiency virus 1
B9A2Q4	gag	P52294	11676	PHISTO	Human immunodeficiency virus 1
B9A2Q4	gag	O60684	11676	PHISTO	Human immunodeficiency virus 1
Q77YG0	vif	P61221	11676	PHISTO	Human immunodeficiency virus 1
Q71B32	gag	P23284	11676	PHISTO	Human immunodeficiency virus 1
Q71B33	gag	P23284	11676	PHISTO	Human immunodeficiency virus 1
Q71B34	gag	P23284	11676	PHISTO	Human immunodeficiency virus 1
Q71B36	gag	P23284	11676	PHISTO	Human immunodeficiency virus 1
Q71B38	gag	P23284	11676	PHISTO	Human immunodeficiency virus 1
Q71B39	gag	P23284	11676	PHISTO	Human immunodeficiency virus 1
Q79822	gag	P52294	11676	PHISTO	Human immunodeficiency virus 1
Q79822	gag	P52292	11676	PHISTO	Human immunodeficiency virus 1
Q79822	gag	O00505	11676	PHISTO	Human immunodeficiency virus 1
Q79822	gag	O00629	11676	PHISTO	Human immunodeficiency virus 1
Q79822	gag	O60684	11676	PHISTO	Human immunodeficiency virus 1
Q79822	gag	P49590	11676	PHISTO	Human immunodeficiency virus 1
Q79822	gag	O75530	11676	PHISTO	Human immunodeficiency virus 1
Q79822	gag	P68104	11676	PHISTO	Human immunodeficiency virus 1
Q79822	gag	Q15025	11676	PHISTO	Human immunodeficiency virus 1
O09528	vpu	P01730	11676	PHISTO	Human immunodeficiency virus 1
Q77YG1	gag	Q9HC16	11676	PHISTO	Human immunodeficiency virus 1
B9A2Q4	gag	O75531	11676	PHISTO	Human immunodeficiency virus 1
Q77YG1	gag	O75531	11676	PHISTO	Human immunodeficiency virus 1
Q77YG1	gag	P61221	11676	PHISTO	Human immunodeficiency virus 1
B9A2Q4	gag	O60551	11676	PHISTO	Human immunodeficiency virus 1
B9A2Q4	gag	P30419	11676	PHISTO	Human immunodeficiency virus 1
Q79822	gag	P30419	11676	PHISTO	Human immunodeficiency virus 1
Q79822	gag	O60551	11676	PHISTO	Human immunodeficiency virus 1
Q77YG1	gag	O95793	11676	PHISTO	Human immunodeficiency virus 1
B9A2Q4	gag	P05362	11676	PHISTO	Human immunodeficiency virus 1
Q79822	gag	P05362	11676	PHISTO	Human immunodeficiency virus 1
P88585	gag	P28482	11676	PHISTO	Human immunodeficiency virus 1
B9A2Q4	gag	P08631	11676	PHISTO	Human immunodeficiency virus 1
B9A2Q4	gag	Q13177	11676	PHISTO	Human immunodeficiency virus 1
Q77YG0	vif	P28482	11676	PHISTO	Human immunodeficiency virus 1
B9A2Q4	gag	P07332	11676	PHISTO	Human immunodeficiency virus 1
Q90VU7	nef	P12931	11676	PHISTO	Human immunodeficiency virus 1
Q90VU7	nef	P06239	11676	PHISTO	Human immunodeficiency virus 1
Q90VU7	nef	P08631	11676	PHISTO	Human immunodeficiency virus 1
Q90VU7	nef	P07948	11676	PHISTO	Human immunodeficiency virus 1
Q90VU7	nef	P07947	11676	PHISTO	Human immunodeficiency virus 1
Q90VU7	nef	P06241	11676	PHISTO	Human immunodeficiency virus 1
Q90VU7	nef	Q14155	11676	PHISTO	Human immunodeficiency virus 1
Q90VU7	nef	Q15052	11676	PHISTO	Human immunodeficiency virus 1
Q90VU7	nef	P16333	11676	PHISTO	Human immunodeficiency virus 1
Q90VU7	nef	Q8TEJ3	11676	PHISTO	Human immunodeficiency virus 1
B9A2Q4	gag	P13987	11676	PHISTO	Human immunodeficiency virus 1
Q77YG1	gag	P13987	11676	PHISTO	Human immunodeficiency virus 1
Q77YG0	vif	P13987	11676	PHISTO	Human immunodeficiency virus 1
Q77YG0	vif	P08962	11676	PHISTO	Human immunodeficiency virus 1
Q77YG1	gag	P08962	11676	PHISTO	Human immunodeficiency virus 1
Q79822	gag	P13987	11676	PHISTO	Human immunodeficiency virus 1
Q79822	gag	P04216	11676	PHISTO	Human immunodeficiency virus 1
B9A2Q4	gag	P01579	11676	PHISTO	Human immunodeficiency virus 1
O40177	nef	P06241	11676	PHISTO	Human immunodeficiency virus 1
Q77YG0	vif	P27361	11676	PHISTO	Human immunodeficiency virus 1
Q77YG1	gag	P23528	11676	PHISTO	Human immunodeficiency virus 1
Q77YG1	gag	P15311	11676	PHISTO	Human immunodeficiency virus 1
Q77YG1	gag	P26038	11676	PHISTO	Human immunodeficiency virus 1
Q72497	gag	P62937	11676	PHISTO	Human immunodeficiency virus 1
Q79791	gag	P62937	11676	PHISTO	Human immunodeficiency virus 1
Q9Q723	env	P01730	11676	PHISTO	Human immunodeficiency virus 1
Q03806	env	P01730	11676	PHISTO	Human immunodeficiency virus 1
Q77YG1	gag	O60551	11676	PHISTO	Human immunodeficiency virus 1
Q77YG1	gag	P30419	11676	PHISTO	Human immunodeficiency virus 1
Q72547	gag-pol	P68400	11676	PHISTO	Human immunodeficiency virus 1
Q77YG1	gag	P79483	11676	PHISTO	Human immunodeficiency virus 1
Q77YG1	gag	P13762	11676	PHISTO	Human immunodeficiency virus 1
Q77YG1	gag	Q30154	11676	PHISTO	Human immunodeficiency virus 1
Q71B31	gag	P08962	11676	PHISTO	Human immunodeficiency virus 1
Q77YG1	gag	P01562	11676	PHISTO	Human immunodeficiency virus 1
Q71B31	gag	P11279	11676	PHISTO	Human immunodeficiency virus 1
Q77YG1	gag	P04229	11676	PHISTO	Human immunodeficiency virus 1
Q71B32	gag	P08962	11676	PHISTO	Human immunodeficiency virus 1
Q71B33	gag	P08962	11676	PHISTO	Human immunodeficiency virus 1
Q71B34	gag	P08962	11676	PHISTO	Human immunodeficiency virus 1
Q71B36	gag	P08962	11676	PHISTO	Human immunodeficiency virus 1
Q71B38	gag	P08962	11676	PHISTO	Human immunodeficiency virus 1
Q71B39	gag	P08962	11676	PHISTO	Human immunodeficiency virus 1
Q71B32	gag	P11279	11676	PHISTO	Human immunodeficiency virus 1
Q71B33	gag	P11279	11676	PHISTO	Human immunodeficiency virus 1
Q71B34	gag	P11279	11676	PHISTO	Human immunodeficiency virus 1
Q71B36	gag	P11279	11676	PHISTO	Human immunodeficiency virus 1
Q71B38	gag	P11279	11676	PHISTO	Human immunodeficiency virus 1
Q71B39	gag	P11279	11676	PHISTO	Human immunodeficiency virus 1
Q72874	gag-pol	Q15046	11676	PHISTO	Human immunodeficiency virus 1
B0FAM1	env	P08670	11676	PHISTO	Human immunodeficiency virus 1
B0FAM1	env	P14136	11676	PHISTO	Human immunodeficiency virus 1
B0FAM1	env	P23443	11676	PHISTO	Human immunodeficiency virus 1
B0FAM1	env	P32241	11676	PHISTO	Human immunodeficiency virus 1
B0FAM1	env	O43889	11676	PHISTO	Human immunodeficiency virus 1
B0FAM1	env	P04049	11676	PHISTO	Human immunodeficiency virus 1
B0FAM1	env	P10147	11676	PHISTO	Human immunodeficiency virus 1
B0FAM1	env	P13236	11676	PHISTO	Human immunodeficiency virus 1
B0FAM1	env	P22301	11676	PHISTO	Human immunodeficiency virus 1
B0FAM1	env	P27361	11676	PHISTO	Human immunodeficiency virus 1
B0FAM1	env	Q9UI14	11676	PHISTO	Human immunodeficiency virus 1
Q1H8S9	env	P02768	11676	PHISTO	Human immunodeficiency virus 1
Q1H8S9	env	Q9UI14	11676	PHISTO	Human immunodeficiency virus 1
A0ESL8	nef	O14734	11676	PHISTO	Human immunodeficiency virus 1
A0ESL8	nef	P01730	11676	PHISTO	Human immunodeficiency virus 1
A0ESL8	nef	P28070	11676	PHISTO	Human immunodeficiency virus 1
A0ESL8	nef	P53618	11676	PHISTO	Human immunodeficiency virus 1
A0ESL8	nef	P63244	11676	PHISTO	Human immunodeficiency virus 1
A0ESL8	nef	Q15025	11676	PHISTO	Human immunodeficiency virus 1
A0EXJ0	vif	P21673	11676	PHISTO	Human immunodeficiency virus 1
A0EXJ0	vif	Q13342	11676	PHISTO	Human immunodeficiency virus 1
A0EXJ0	vif	Q9NWF9	11676	PHISTO	Human immunodeficiency virus 1
A0EXJ1	vpr	P13051	11676	PHISTO	Human immunodeficiency virus 1
A0EXJ1	vpr	P27348	11676	PHISTO	Human immunodeficiency virus 1
A0EXJ1	vpr	P54725	11676	PHISTO	Human immunodeficiency virus 1
A0EXJ1	vpr	Q7L5N1	11676	PHISTO	Human immunodeficiency virus 1
A0EXJ2	tat	P17676	11676	PHISTO	Human immunodeficiency virus 1
A0EXJ2	tat	P21912	11676	PHISTO	Human immunodeficiency virus 1
A0EXJ2	tat	P22692	11676	PHISTO	Human immunodeficiency virus 1
A0EXJ2	tat	P28799	11676	PHISTO	Human immunodeficiency virus 1
A0EXJ2	tat	Q07021	11676	PHISTO	Human immunodeficiency virus 1
A0EXJ2	tat	Q9Y5B0	11676	PHISTO	Human immunodeficiency virus 1
A0EXJ3	rev	Q07021	11676	PHISTO	Human immunodeficiency virus 1
A0EXJ3	rev	Q14807	11676	PHISTO	Human immunodeficiency virus 1
A6YEJ0	gag-pol	O14893	11676	PHISTO	Human immunodeficiency virus 1
A6YEJ0	gag-pol	Q12824	11676	PHISTO	Human immunodeficiency virus 1
B0FAM1	env	O43747	11676	PHISTO	Human immunodeficiency virus 1
B0FAM1	env	O75843	11676	PHISTO	Human immunodeficiency virus 1
B0FAM1	env	O94973	11676	PHISTO	Human immunodeficiency virus 1
B0FAM1	env	O95782	11676	PHISTO	Human immunodeficiency virus 1
B0FAM1	env	P35221	11676	PHISTO	Human immunodeficiency virus 1
B0FAM1	env	P53680	11676	PHISTO	Human immunodeficiency virus 1
B0FAM1	env	P56377	11676	PHISTO	Human immunodeficiency virus 1
B0FAM1	env	P61966	11676	PHISTO	Human immunodeficiency virus 1
B0FAM1	env	P63010	11676	PHISTO	Human immunodeficiency virus 1
B0FAM1	env	Q16539	11676	PHISTO	Human immunodeficiency virus 1
B0FAM1	env	Q96CW1	11676	PHISTO	Human immunodeficiency virus 1
B0FAM1	env	Q9BXS5	11676	PHISTO	Human immunodeficiency virus 1
B0FAM1	env	Q9Y6Q5	11676	PHISTO	Human immunodeficiency virus 1
B9A2Q4	gag	O15131	11676	PHISTO	Human immunodeficiency virus 1
O73199	gag	P49590	11676	PHISTO	Human immunodeficiency virus 1
O73199	gag	P68104	11676	PHISTO	Human immunodeficiency virus 1
O73199	gag	Q15025	11676	PHISTO	Human immunodeficiency virus 1
O73199	gag	O75530	11676	PHISTO	Human immunodeficiency virus 1
Q71B33	gag	O00505	11676	PHISTO	Human immunodeficiency virus 1
Q71B33	gag	O00629	11676	PHISTO	Human immunodeficiency virus 1
Q71B33	gag	O15131	11676	PHISTO	Human immunodeficiency virus 1
Q71B33	gag	O60684	11676	PHISTO	Human immunodeficiency virus 1
Q71B33	gag	O75530	11676	PHISTO	Human immunodeficiency virus 1
Q71B33	gag	O95239	11676	PHISTO	Human immunodeficiency virus 1
Q71B33	gag	P49590	11676	PHISTO	Human immunodeficiency virus 1
Q71B33	gag	P52294	11676	PHISTO	Human immunodeficiency virus 1
Q71B33	gag	P63165	11676	PHISTO	Human immunodeficiency virus 1
Q71B33	gag	P63279	11676	PHISTO	Human immunodeficiency virus 1
Q71B33	gag	Q15025	11676	PHISTO	Human immunodeficiency virus 1
Q72499	vif	Q9NWF9	11676	PHISTO	Human immunodeficiency virus 1
Q72874	gag-pol	O14893	11676	PHISTO	Human immunodeficiency virus 1
Q72874	gag-pol	Q12824	11676	PHISTO	Human immunodeficiency virus 1
Q76129	gag	P23284	11676	PHISTO	Human immunodeficiency virus 1
Q77YF9	vpr	O15504	11676	PHISTO	Human immunodeficiency virus 1
Q77YF9	vpr	O95067	11676	PHISTO	Human immunodeficiency virus 1
Q77YF9	vpr	P06493	11676	PHISTO	Human immunodeficiency virus 1
Q77YF9	vpr	P13051	11676	PHISTO	Human immunodeficiency virus 1
Q77YF9	vpr	P14635	11676	PHISTO	Human immunodeficiency virus 1
Q77YF9	vpr	P22674	11676	PHISTO	Human immunodeficiency virus 1
A0EXJ2	tat	P05412	11676	PHISTO	Human immunodeficiency virus 1
A0EXJ2	tat	P14859	11676	PHISTO	Human immunodeficiency virus 1
A0EXJ2	tat	P18084	11676	PHISTO	Human immunodeficiency virus 1
A0EXJ2	tat	P19838	11676	PHISTO	Human immunodeficiency virus 1
A0EXJ2	tat	Q00653	11676	PHISTO	Human immunodeficiency virus 1
A0EXJ2	tat	Q01201	11676	PHISTO	Human immunodeficiency virus 1
A0EXJ2	tat	Q04206	11676	PHISTO	Human immunodeficiency virus 1
A0EXJ2	tat	Q92793	11676	PHISTO	Human immunodeficiency virus 1
B0FAM1	env	P06756	11676	PHISTO	Human immunodeficiency virus 1
B0FAM1	env	P13612	11676	PHISTO	Human immunodeficiency virus 1
B0FAM1	env	P13987	11676	PHISTO	Human immunodeficiency virus 1
B0FAM1	env	P18433	11676	PHISTO	Human immunodeficiency virus 1
B0FAM1	env	P23467	11676	PHISTO	Human immunodeficiency virus 1
B0FAM1	env	P26842	11676	PHISTO	Human immunodeficiency virus 1
B0FAM1	env	P27487	11676	PHISTO	Human immunodeficiency virus 1
B0FAM1	env	P28907	11676	PHISTO	Human immunodeficiency virus 1
B0FAM1	env	Q16827	11676	PHISTO	Human immunodeficiency virus 1
B0FAM1	env	Q9HCG7	11676	PHISTO	Human immunodeficiency virus 1
B9A2Q4	gag	O60664	11676	PHISTO	Human immunodeficiency virus 1
O73199	gag	O60664	11676	PHISTO	Human immunodeficiency virus 1
Q71B33	gag	O60551	11676	PHISTO	Human immunodeficiency virus 1
Q71B33	gag	P30419	11676	PHISTO	Human immunodeficiency virus 1
Q71B33	gag	O95793	11676	PHISTO	Human immunodeficiency virus 1
Q72874	gag-pol	O75531	11676	PHISTO	Human immunodeficiency virus 1
Q72874	gag-pol	P17096	11676	PHISTO	Human immunodeficiency virus 1
Q72874	gag-pol	Q9NS91	11676	PHISTO	Human immunodeficiency virus 1
B0FAM1	env	P22897	11676	PHISTO	Human immunodeficiency virus 1
B0FAM1	env	Q9UBG0	11676	PHISTO	Human immunodeficiency virus 1
Q71B33	gag	P05362	11676	PHISTO	Human immunodeficiency virus 1
Q71B33	gag	P60709	11676	PHISTO	Human immunodeficiency virus 1
Q71B33	gag	P63261	11676	PHISTO	Human immunodeficiency virus 1
A0EXJ2	tat	P06748	11676	PHISTO	Human immunodeficiency virus 1
B9A2Q4	gag	O15205	11676	PHISTO	Human immunodeficiency virus 1
Q72874	gag-pol	P06753	11676	PHISTO	Human immunodeficiency virus 1
Q72874	gag-pol	P07951	11676	PHISTO	Human immunodeficiency virus 1
Q72874	gag-pol	P12883	11676	PHISTO	Human immunodeficiency virus 1
Q72874	gag-pol	P13533	11676	PHISTO	Human immunodeficiency virus 1
Q72874	gag-pol	P17661	11676	PHISTO	Human immunodeficiency virus 1
Q72874	gag-pol	P35579	11676	PHISTO	Human immunodeficiency virus 1
Q72874	gag-pol	P35749	11676	PHISTO	Human immunodeficiency virus 1
Q72874	gag-pol	Q7Z406	11676	PHISTO	Human immunodeficiency virus 1
Q72874	gag-pol	P35580	11676	PHISTO	Human immunodeficiency virus 1
Q72874	gag-pol	Q9BXW4	11676	PHISTO	Human immunodeficiency virus 1
Q72874	gag-pol	Q9H492	11676	PHISTO	Human immunodeficiency virus 1
Q72874	gag-pol	Q9UKX3	11676	PHISTO	Human immunodeficiency virus 1
A0MMD8	gag-pol	P60709	11676	PHISTO	Human immunodeficiency virus 1
A0ESL8	nef	P09471	11676	PHISTO	Human immunodeficiency virus 1
A0EXJ3	rev	P60709	11676	PHISTO	Human immunodeficiency virus 1
A0EXJ3	rev	Q07666	11676	PHISTO	Human immunodeficiency virus 1
B0FAM1	env	Q01959	11676	PHISTO	Human immunodeficiency virus 1
B9A2Q4	gag	P04216	11676	PHISTO	Human immunodeficiency virus 1
Q71B33	gag	P04216	11676	PHISTO	Human immunodeficiency virus 1
Q71B33	gag	P13987	11676	PHISTO	Human immunodeficiency virus 1
Q71B33	gag	P23381	11676	PHISTO	Human immunodeficiency virus 1
Q71B33	gag	Q99816	11676	PHISTO	Human immunodeficiency virus 1
Q72874	gag-pol	O00410	11676	PHISTO	Human immunodeficiency virus 1
Q72874	gag-pol	O00505	11676	PHISTO	Human immunodeficiency virus 1
Q72874	gag-pol	O00629	11676	PHISTO	Human immunodeficiency virus 1
Q72874	gag-pol	O15131	11676	PHISTO	Human immunodeficiency virus 1
Q72874	gag-pol	O60684	11676	PHISTO	Human immunodeficiency virus 1
Q72874	gag-pol	O95251	11676	PHISTO	Human immunodeficiency virus 1
Q72874	gag-pol	P52292	11676	PHISTO	Human immunodeficiency virus 1
Q72874	gag-pol	P52294	11676	PHISTO	Human immunodeficiency virus 1
Q72874	gag-pol	Q09472	11676	PHISTO	Human immunodeficiency virus 1
Q72874	gag-pol	Q14974	11676	PHISTO	Human immunodeficiency virus 1
Q72874	gag-pol	Q8WYB5	11676	PHISTO	Human immunodeficiency virus 1
Q72874	gag-pol	Q92794	11676	PHISTO	Human immunodeficiency virus 1
Q72874	gag-pol	Q92973	11676	PHISTO	Human immunodeficiency virus 1
Q72874	gag-pol	Q9H7Z6	11676	PHISTO	Human immunodeficiency virus 1
B0FAM1	env	P15813	11676	PHISTO	Human immunodeficiency virus 1
B0FAM1	env	Q9ULZ1	11676	PHISTO	Human immunodeficiency virus 1
A0ESL8	nef	P12931	11676	PHISTO	Human immunodeficiency virus 1
A0ESL8	nef	P08631	11676	PHISTO	Human immunodeficiency virus 1
Q71B33	gag	P01579	11676	PHISTO	Human immunodeficiency virus 1
A0A891	env	P11226	11676	PHISTO	Human immunodeficiency virus 1
A0A891	env	P15311	11676	PHISTO	Human immunodeficiency virus 1
A0A891	env	P26038	11676	PHISTO	Human immunodeficiency virus 1
A0A891	env	P49257	11676	PHISTO	Human immunodeficiency virus 1
A0EXJ1	vpr	Q9Y4B6	11676	PHISTO	Human immunodeficiency virus 1
A0EXJ2	tat	O00268	11676	PHISTO	Human immunodeficiency virus 1
A0EXJ2	tat	O14981	11676	PHISTO	Human immunodeficiency virus 1
A0EXJ2	tat	P19525	11676	PHISTO	Human immunodeficiency virus 1
A0EXJ2	tat	P21675	11676	PHISTO	Human immunodeficiency virus 1
A0EXJ2	tat	P49848	11676	PHISTO	Human immunodeficiency virus 1
A0EXJ2	tat	P78527	11676	PHISTO	Human immunodeficiency virus 1
A0EXJ2	tat	Q12962	11676	PHISTO	Human immunodeficiency virus 1
A0EXJ2	tat	Q15542	11676	PHISTO	Human immunodeficiency virus 1
A0EXJ2	tat	Q15543	11676	PHISTO	Human immunodeficiency virus 1
A0EXJ2	tat	Q15544	11676	PHISTO	Human immunodeficiency virus 1
A0EXJ2	tat	Q15545	11676	PHISTO	Human immunodeficiency virus 1
A0EXJ2	tat	Q16514	11676	PHISTO	Human immunodeficiency virus 1
A0EXJ2	tat	Q16594	11676	PHISTO	Human immunodeficiency virus 1
A0EXJ2	tat	Q6P1X5	11676	PHISTO	Human immunodeficiency virus 1
A0EXJ2	tat	Q7Z7C8	11676	PHISTO	Human immunodeficiency virus 1
A0EXJ2	tat	Q92804	11676	PHISTO	Human immunodeficiency virus 1
A0ZUT1	env	Q9UGM5	11676	PHISTO	Human immunodeficiency virus 1
A6YEJ0	gag-pol	P35558	11676	PHISTO	Human immunodeficiency virus 1
A6YEJ0	gag-pol	P50991	11676	PHISTO	Human immunodeficiency virus 1
A6YEJ0	gag-pol	P68104	11676	PHISTO	Human immunodeficiency virus 1
B0FAM1	env	P02788	11676	PHISTO	Human immunodeficiency virus 1
B0FAM1	env	P03973	11676	PHISTO	Human immunodeficiency virus 1
B0FAM1	env	P11226	11676	PHISTO	Human immunodeficiency virus 1
B0FAM1	env	P15311	11676	PHISTO	Human immunodeficiency virus 1
B0FAM1	env	P26038	11676	PHISTO	Human immunodeficiency virus 1
B0FAM1	env	P33908	11676	PHISTO	Human immunodeficiency virus 1
B0FAM1	env	P49257	11676	PHISTO	Human immunodeficiency virus 1
B0FAM1	env	Q10469	11676	PHISTO	Human immunodeficiency virus 1
B0FAM1	env	Q68CQ7	11676	PHISTO	Human immunodeficiency virus 1
B0FAM1	env	Q7Z4J2	11676	PHISTO	Human immunodeficiency virus 1
B0FAM1	env	Q8IYK4	11676	PHISTO	Human immunodeficiency virus 1
B0FAM1	env	Q8NBJ5	11676	PHISTO	Human immunodeficiency virus 1
B0FAM1	env	Q96MS3	11676	PHISTO	Human immunodeficiency virus 1
B0FAM1	env	Q9H1C3	11676	PHISTO	Human immunodeficiency virus 1
B0FAM1	env	Q9NP73	11676	PHISTO	Human immunodeficiency virus 1
B0FAM1	env	Q9NR34	11676	PHISTO	Human immunodeficiency virus 1
B0FAM1	env	Q9NTJ4	11676	PHISTO	Human immunodeficiency virus 1
B0FAM1	env	Q9UKM7	11676	PHISTO	Human immunodeficiency virus 1
B0FAM1	env	Q9Y2E5	11676	PHISTO	Human immunodeficiency virus 1
Q1H8S9	env	P02745	11676	PHISTO	Human immunodeficiency virus 1
Q1H8S9	env	P02746	11676	PHISTO	Human immunodeficiency virus 1
Q1H8S9	env	P02747	11676	PHISTO	Human immunodeficiency virus 1
Q71B33	gag	P15311	11676	PHISTO	Human immunodeficiency virus 1
Q71B33	gag	P23528	11676	PHISTO	Human immunodeficiency virus 1
Q71B33	gag	P26038	11676	PHISTO	Human immunodeficiency virus 1
Q71B33	gag	Q15046	11676	PHISTO	Human immunodeficiency virus 1
Q72874	gag-pol	P02775	11676	PHISTO	Human immunodeficiency virus 1
Q72874	gag-pol	P10809	11676	PHISTO	Human immunodeficiency virus 1
Q72874	gag-pol	P35558	11676	PHISTO	Human immunodeficiency virus 1
Q72874	gag-pol	P50991	11676	PHISTO	Human immunodeficiency virus 1
Q72874	gag-pol	P61604	11676	PHISTO	Human immunodeficiency virus 1
Q72874	gag-pol	Q86SX6	11676	PHISTO	Human immunodeficiency virus 1
Q72874	gag-pol	Q9NS18	11676	PHISTO	Human immunodeficiency virus 1
Q72874	gag-pol	O75530	11676	PHISTO	Human immunodeficiency virus 1
B0FAM1	env	P30101	11676	PHISTO	Human immunodeficiency virus 1
B0FAM1	env	Q13724	11676	PHISTO	Human immunodeficiency virus 1
B0FAM1	env	Q14554	11676	PHISTO	Human immunodeficiency virus 1
B0FAM1	env	Q15084	11676	PHISTO	Human immunodeficiency virus 1
B0FAM1	env	P13667	11676	PHISTO	Human immunodeficiency virus 1
B0FAM1	env	Q9UGM3	11676	PHISTO	Human immunodeficiency virus 1
A0EXJ2	tat	P24864	11676	PHISTO	Human immunodeficiency virus 1
B0FAM1	env	P48061	11676	PHISTO	Human immunodeficiency virus 1
A0A891	env	P02745	11676	PHISTO	Human immunodeficiency virus 1
A0A891	env	P02746	11676	PHISTO	Human immunodeficiency virus 1
A0A891	env	P02747	11676	PHISTO	Human immunodeficiency virus 1
A0A891	env	P02751	11676	PHISTO	Human immunodeficiency virus 1
A0A891	env	P20916	11676	PHISTO	Human immunodeficiency virus 1
A0ZUT1	env	P02751	11676	PHISTO	Human immunodeficiency virus 1
B0FAM1	env	P02647	11676	PHISTO	Human immunodeficiency virus 1
B0FAM1	env	P02745	11676	PHISTO	Human immunodeficiency virus 1
B0FAM1	env	P02746	11676	PHISTO	Human immunodeficiency virus 1
B0FAM1	env	P02747	11676	PHISTO	Human immunodeficiency virus 1
B0FAM1	env	P10809	11676	PHISTO	Human immunodeficiency virus 1
B0FAM1	env	P14780	11676	PHISTO	Human immunodeficiency virus 1
B0FAM1	env	P20916	11676	PHISTO	Human immunodeficiency virus 1
B0FAM1	env	P23284	11676	PHISTO	Human immunodeficiency virus 1
B0FAM1	env	P25445	11676	PHISTO	Human immunodeficiency virus 1
Q1H8S9	env	P10809	11676	PHISTO	Human immunodeficiency virus 1
A0EXJ3	rev	P62826	11676	PHISTO	Human immunodeficiency virus 1
A0ESL8	nef	P84077	11676	PHISTO	Human immunodeficiency virus 1
A0EXJ3	rev	Q14974	11676	PHISTO	Human immunodeficiency virus 1
B0FAM1	env	O43707	11676	PHISTO	Human immunodeficiency virus 1
B0FAM1	env	P11831	11676	PHISTO	Human immunodeficiency virus 1
B0FAM1	env	P60709	11676	PHISTO	Human immunodeficiency virus 1
B0FAM1	env	P62736	11676	PHISTO	Human immunodeficiency virus 1
B0FAM1	env	P63261	11676	PHISTO	Human immunodeficiency virus 1
B0FAM1	env	P63267	11676	PHISTO	Human immunodeficiency virus 1
B0FAM1	env	P68032	11676	PHISTO	Human immunodeficiency virus 1
B0FAM1	env	P68133	11676	PHISTO	Human immunodeficiency virus 1
B0FAM1	env	Q92888	11676	PHISTO	Human immunodeficiency virus 1
A0A891	env	P51679	11676	PHISTO	Human immunodeficiency virus 1
A0EXJ2	tat	Q9C0K0	11676	PHISTO	Human immunodeficiency virus 1
B0FAM1	env	P06239	11676	PHISTO	Human immunodeficiency virus 1
B0FAM1	env	P35228	11676	PHISTO	Human immunodeficiency virus 1
B0FAM1	env	P51679	11676	PHISTO	Human immunodeficiency virus 1
B0FAM1	env	Q05586	11676	PHISTO	Human immunodeficiency virus 1
B0FAM1	env	Q13224	11676	PHISTO	Human immunodeficiency virus 1
B0FAM1	env	Q14957	11676	PHISTO	Human immunodeficiency virus 1
[truncated: 18,925 more rows]

## Sheet: Table S2
Table S2. The list of HIV-1-human RNA-RNA interactions.
Organism 1	RNA type 1	Entity name 1	Organism 2	RNA type 2	Entity name 2
Virus	miRNA	hiv1-miR-H3	Virus	mRNA	5'LTR
Host	miRNA	hsa-mir-1236	Host	mRNA	DCAF1
Host	miRNA	hsa-let-7a-5p	Host	mRNA	IL10
Host	miRNA	hsa-let-7a-5p	Host	mRNA	LIN28A
Host	miRNA	hsa-let-7b-5p	Host	mRNA	IL10
Host	miRNA	hsa-let-7c-5p	Host	mRNA	IL10
Host	miRNA	hsa-let-7d-5p	Host	mRNA	IL10
Host	miRNA	hsa-let-7e-5p	Host	mRNA	IL10
Host	miRNA	hsa-let-7f-5p	Host	mRNA	IL10
Host	miRNA	hsa-miR-15a-5p	Virus	mRNA	nef
Host	miRNA	hsa-miR-15a-5p	Host	mRNA	PURA
Host	miRNA	hsa-miR-16-5p	Virus	mRNA	nef
Host	miRNA	hsa-miR-16-5p	Host	mRNA	PURA
Host	miRNA	hsa-miR-17-5p	Host	mRNA	KAT2B
Host	miRNA	hsa-miR-17-5p	Virus	mRNA	nef
Host	miRNA	hsa-miR-20a-5p	Host	mRNA	KAT2B
Host	miRNA	hsa-miR-20a-5p	Host	mRNA	PURA
Host	miRNA	hsa-miR-21-5p	Virus	mRNA	nef
Host	miRNA	hsa-miR-24-1-5p	Virus	mRNA	nef
Host	miRNA	hsa-miR-24-3p	Virus	mRNA	nef
Host	miRNA	hsa-miR-28-5p	Virus	mRNA	nef
Host	miRNA	hsa-miR-28-5p	Virus	mRNA	nt9097-9116
Host	miRNA	hsa-miR-28-5p	Virus	mRNA	rev
Host	miRNA	hsa-miR-28-5p	Virus	mRNA	tat
Host	miRNA	hsa-miR-28-5p	Host	mRNA	TLR3
Host	miRNA	hsa-miR-29a-3p	Virus	mRNA	gag
Host	miRNA	hsa-miR-29a-3p	Virus	mRNA	nef
Host	miRNA	hsa-miR-30a-5p	Virus	mRNA	env
Host	miRNA	hsa-miR-92a-3p	Host	mRNA	KAT2B
Host	miRNA	hsa-miR-93-5p	Host	mRNA	PURA
Host	miRNA	hsa-miR-101-3p	Host	mRNA	CDH5
Host	miRNA	hsa-miR-29b-3p	Virus	mRNA	nef
Host	miRNA	hsa-miR-29b-3p	Host	mRNA	MCL1
Host	miRNA	hsa-miR-29b-3p	Host	mRNA	CCNT1
Host	miRNA	hsa-miR-192-5p	Host	mRNA	PABPC4
Host	miRNA	hsa-miR-198	Host	mRNA	CCNT1
Host	miRNA	hsa-miR-211-5p	Virus	mRNA	nef
Host	miRNA	hsa-miR-211-5p	Host	mRNA	IL1B
Host	miRNA	hsa-miR-217-5p	Host	mRNA	SIRT1
Host	miRNA	hsa-miR-223-3p	Virus	mRNA	nef
Host	miRNA	hsa-miR-223-3p	Virus	mRNA	nt8720-8740
Host	miRNA	hsa-miR-223-3p	Virus	mRNA	rev
Host	miRNA	hsa-miR-223-3p	Virus	mRNA	tat
Host	miRNA	hsa-miR-223-3p	Host	mRNA	LIF
Host	miRNA	hsa-miR-223-3p	Host	mRNA	RHOB
Host	miRNA	hsa-miR-223-3p	Host	mRNA	SP3
Host	miRNA	hsa-miR-223-3p	Host	mRNA	TLR3
Host	miRNA	hsa-miR-223-3p	Host	mRNA	CCNT1
Host	miRNA	hsa-let-7g-5p	Host	mRNA	IL10
Host	miRNA	hsa-let-7g-5p	Host	mRNA	LIN28A
Host	miRNA	hsa-let-7i-5p	Host	mRNA	IL10
Host	miRNA	hsa-miR-15b-5p	Virus	mRNA	nef
Host	miRNA	hsa-miR-27b-3p	Host	mRNA	CCNT1
Host	miRNA	hsa-miR-125b-5p	Virus	mRNA	gag
Host	miRNA	hsa-miR-125b-5p	Virus	mRNA	nef
Host	miRNA	hsa-miR-125b-5p	Virus	mRNA	nt8096-8127
Host	miRNA	hsa-miR-125b-5p	Virus	mRNA	rev
Host	miRNA	hsa-miR-125b-5p	Virus	mRNA	tat
Host	miRNA	hsa-miR-125b-5p	Host	mRNA	TLR3
Host	miRNA	hsa-miR-138-5p	Virus	mRNA	nef
Host	miRNA	hsa-miR-125a-5p	Host	mRNA	IFITM3
Host	miRNA	hsa-miR-146a-5p	Host	mRNA	CCL8
Host	miRNA	hsa-miR-149-5p	Virus	mRNA	vpr
Host	miRNA	hsa-miR-150-5p	Virus	mRNA	nef
Host	miRNA	hsa-miR-150-5p	Virus	mRNA	nt8113-8134
Host	miRNA	hsa-miR-150-5p	Virus	mRNA	rev
Host	miRNA	hsa-miR-150-5p	Virus	mRNA	tat
Host	miRNA	hsa-miR-150-5p	Host	mRNA	CCR5
Host	miRNA	hsa-miR-150-5p	Host	mRNA	TLR3
Host	miRNA	hsa-miR-150-5p	Host	mRNA	CCNT1
Host	miRNA	hsa-miR-155-5p	Virus	mRNA	env
Host	miRNA	hsa-miR-155-5p	Virus	mRNA	nef
Host	miRNA	hsa-miR-155-5p	Host	mRNA	CD209
Host	miRNA	hsa-miR-106b-5p	Host	mRNA	PURA
Host	miRNA	hsa-miR-29c-3p	Virus	mRNA	nef
Host	miRNA	hsa-miR-29c-3p	Host	mRNA	PIK3R1
Host	miRNA	hsa-miR-365a-3p	Host	mRNA	FOXK2
Host	miRNA	hsa-miR-378a-5p	Virus	mRNA	env
Host	miRNA	hsa-miR-378a-5p	Virus	mRNA	vpu
Host	miRNA	hsa-miR-382-5p	Virus	mRNA	nt8957-8979
Host	miRNA	hsa-miR-382-5p	Virus	mRNA	nef
Host	miRNA	hsa-miR-382-5p	Virus	mRNA	rev
Host	miRNA	hsa-miR-382-5p	Virus	mRNA	tat
Host	miRNA	hsa-miR-382-5p	Host	mRNA	TLR3
Host	miRNA	hsa-miR-326	Virus	mRNA	nef
Host	miRNA	hsa-miR-326	Virus	mRNA	env
Host	miRNA	hsa-miR-324-5p	Virus	mRNA	vif
Host	miRNA	hsa-miR-578	Host	mRNA	IL1B
Virus	miRNA	hiv1-miR-N367	Host	mRNA	PABPC4
Virus	miRNA	hiv1-miR-N367	Virus	mRNA	5'LTR
Virus	miRNA	hiv1-miR-N367	Virus	mRNA	nef
Virus	miRNA	hiv1-miR-H1	Host	mRNA	AATF
Virus	miRNA	hiv1-miR-H1	Host	mRNA	BCL2
Virus	miRNA	hiv1-miR-H1	Host	mRNA	MYC
Virus	miRNA	hiv1-miR-H1	Host	mRNA	PAWR
Virus	miRNA	hiv1-miR-H1	Virus	mRNA	vif
Virus	miRNA	hiv1-miR-H1	Host	miRNA	hsa-miR-149-5p
Virus	miRNA	hiv1-miR-H1	Host	miRNA	hsa-mir-149
Host	miRNA	hsa-miR-28-3p	Host	mRNA	CCR5
Host	miRNA	hsa-miR-29a-5p	Virus	mRNA	nef
Host	miRNA	hsa-miR-29b-1-5p	Virus	mRNA	nef
Host	miRNA	hsa-miR-29b-2-5p	Virus	mRNA	nef
Host	miRNA	hsa-miR-223-5p	Host	mRNA	CCNT1
Host	miRNA	hsa-miR-223-5p	Virus	mRNA	nef
Host	miRNA	hsa-let-7g-3p	Host	mRNA	IL10
Host	miRNA	hsa-miR-150-3p	Host	mRNA	CCR5
Host	miRNA	hsa-miR-150-3p	Host	mRNA	CCNT1
Host	miRNA	hsa-miR-29c-5p	Virus	mRNA	nef
Host	miRNA	hsa-miR-548d-5p	Host	mRNA	IL1B
Host	miRNA	hsa-miR-1224-3p	Virus	mRNA	nef
Host	miRNA	hsa-miR-1236-3p	Host	mRNA	DCAF1
Virus	miRNA	hiv1-miR-TAR-5p	Host	mRNA	CASP8
Virus	miRNA	hiv1-miR-TAR-5p	Host	mRNA	ERCC1
Virus	miRNA	hiv1-miR-TAR-5p	Host	mRNA	GIT2
Virus	miRNA	hiv1-miR-TAR-5p	Host	mRNA	HDAC1
Virus	miRNA	hiv1-miR-TAR-5p	Host	mRNA	IER3
Virus	miRNA	hiv1-miR-TAR-5p	Host	mRNA	IKZF1
Virus	miRNA	hiv1-miR-TAR-5p	Host	mRNA	NPM1
Virus	miRNA	hiv1-miR-TAR-5p	Host	mRNA	PIAS4
Virus	miRNA	hiv1-miR-TAR-5p	Virus	mRNA	LTR
Virus	miRNA	hiv1-miR-TAR-3p	Host	mRNA	CASP8
Virus	miRNA	hiv1-miR-TAR-3p	Host	mRNA	GIT2
Virus	miRNA	hiv1-miR-TAR-3p	Host	mRNA	HDAC1
Virus	miRNA	hiv1-miR-TAR-3p	Host	mRNA	IER3
Virus	miRNA	hiv1-miR-TAR-3p	Host	mRNA	IKZF1
Virus	miRNA	hiv1-miR-TAR-3p	Host	mRNA	IKZF3
Virus	miRNA	hiv1-miR-TAR-3p	Host	mRNA	NPM1
Virus	miRNA	hiv1-miR-TAR-3p	Host	mRNA	PIAS4
Host	lncRNA	NEAT1	Virus	mRNA	rev
Host	lncRNA	NEAT1	Virus	mRNA	env
Host	lncRNA	NEAT1	Virus	mRNA	gag-pol
Host	lncRNA	7SL	Host	mRNA	APOBEC3G
Host	lncRNA	7SL	Host	mRNA	APOBEC3F
Host	lncRNA	7SL	Host	mRNA	APOBEC3G
Host	lncRNA	7SL	Host	mRNA	APOBEC3H
Host	lncRNA	Y3	Host	mRNA	APOBEC3G
Host	lncRNA	Y3	Host	mRNA	APOBEC3H

## Sheet: Table S3
Table S3. The list of HIV-related transcriptomic experiments. * conditions from Table 4 of the text of Review.
GEO/ArrayExpress ID	Experimental approach	Experiment type	Cell types	Linked data in GEO	Pubmed IDs	Conditions*
E-MEXP-2032	Microarray	in vitro	Monocyte-Derived Macrophages		19741482	infection status
E-MEXP-2255	Microarray	in vivo	Monocytes			infection stages; infection status
E-MEXP-3139	Microarray, ncRNA microarray	in vitro	Jurkat Cells			HIV variants and mutated proteins; infection status; time-series
E-MEXP-3199	Other	in vitro	Cd4+ T Cells, Cem Cells			other
E-MEXP-3567	Microarray	in vivo	Whole Blood		22559298	co-infections; infection status; other
E-MEXP-3601	Microarray	in vivo	Cd4+ T Cells		24520951	co-infections
E-MEXP-3618	Microarray	in vivo	Monocytes			co-infections; HIV associated diseases
E-MEXP-3635	Microarray	in vivo	Cd8+ T Cells		23028845	co-infections
E-MEXP-3706	Microarray	in vitro	Immature Monocyte-Derived Dendritic Cells		25583169	infection status; other
E-MEXP-3757	Microarray	in vivo	Retina Autopsy		24069333	infection status
E-MEXP-3758	Microarray	in vivo	Retina Autopsy		24069333	infection status
E-MEXP-393	Microarray	in vivo	Cd8+ T Cells		17015699	cell subtypes; infection status
E-MEXP-53	Microarray	in vivo	Peripheral Blood Mononuclear Cells			quantitative characteristics of HIV infection
E-MTAB-1014	Microarray	in vivo	Cd8+ T Cells			co-infections
E-MTAB-1480	Microarray	in vivo	Cd4+ T Cells Subsets			infection status; progression types
E-MTAB-2700	Other	in vitro	Cem-Ss Cells		25590131	other
E-MTAB-3260	Microarray	in vivo	Whole Blood			co-infections; infection status
E-MTAB-3296	Microarray	in vivo	Peripheral Blood Mononuclear Cells			infection status; vaccine treatment
E-MTAB-3977	Microarray	in vitro	Supt1 Cells			small molecule treatment
E-MTAB-4214	ncRNA sequencing	in vitro	Cd4+ T Cells			HIV variants and mutated proteins; infection status
E-MTAB-5982	RNA sequencing	in vitro	Jurkat Cells			small molecule treatment
E-TABM-1163	Microarray	in vitro	Monocyte-Derived Macrophages			co-infections
E-TABM-856	Microarray	in vivo	Whole Blood		21917897	co-infections
GSE100374	Microarray	in vitro	Monocyte-Derived Dendritic Cells	GSE100377	29544097	infection status; small molecule treatment; time-series
GSE10038	Microarray	in vivo	Alveolar Macrophages		19605697	HIV associated diseases; infection status
GSE100587	RNA sequencing	in vitro	Supt1 Cells		30659199	infection status; time-series
GSE101589	Microarray	in vivo	B Cells		30764863	other
GSE102771	Microarray	in vivo	Nk Cells			progression types
GSE103394	ncRNA sequencing	in vitro	Monocyte-Derived Macrophages		28978468	infection status
GSE103555	ncRNA microarray	in vivo	Plasma			infection status; other
GSE103666	RNA sequencing	in vitro	Monocyte-Derived Macrophages		29123518	infection status; other
GSE103671	Microarray	in vivo	Peripheral Blood Mononuclear Cells	GSE103740	30787294	vaccine treatment
GSE103733	Microarray	in vivo	Peripheral Blood Mononuclear Cells	GSE103740	30787294	infection status; vaccine treatment
GSE104640	Microarray	in vivo	Monocytes		29582356	HIV associated diseases; infection status
GSE106238	ncRNA sequencing	in vivo	Plasma Exosomes			co-infections
GSE106792	Microarray	in vivo	Cd4+ T Cells		30320604	cell subtypes; other
GSE106937	Microarray	in vivo	Lung Adenocarcinoma, Squamous Cell Carcinoma, Adjacent Normal Tissue		30177858	HIV associated diseases
GSE107104	RNA sequencing	in vivo	Whole Blood		29764370	co-infections
GSE107549	Microarray	in vivo	Peripheral Blood Mononuclear Cells		31253727	cytokine treatment
GSE108292	Microarray	in vivo	Cd4+ And Cd8+ T Cells	GSE108297		progression types
GSE108294	Microarray	in vivo	Peripheral Blood Mononuclear Cells	GSE108297		progression types
GSE108296	Microarray	in vivo	Whole Blood	GSE108297		progression types
GSE108897	Microarray	in vitro	Monocyte-Derived Macrophages		29437254	infection status
GSE10924	Microarray	in vivo	Peripheral Blood Mononuclear Cells		18724805	other; small molecule treatment
GSE109837	Microarray	in vivo	B Cells			other
GSE110684	RNA sequencing	in vivo	Cd69+ And Cd69- Cd8+ T Cells		29858286	cell subtypes
GSE114883	RNA sequencing	in vitro	Cd4+ T Cells		30745362;31710657	HIV latency and reactivation; infection status
GSE115449	RNA sequencing	in vivo	Peripheral Blood Mononuclear Cells		30270043	other
GSE116073	RNA sequencing	in vitro	Cd4+ T Cells		30692590	infection status; small molecule treatment
GSE116148	ncRNA microarray	in vitro	Mixture Of Cd4+ And Cd8+ T Cells		30692590	infection status; small molecule treatment
GSE117655	RNA sequencing	in vitro	Cd4+ T Cells		30717826	HIV variants and mutated proteins; infection status
GSE118535	ncRNA microarray	in vivo	Serum		30518697	HIV associated diseases
GSE120109	ncRNA sequencing	in vitro	Peripheral Blood Mononuclear Cells		30692590	small molecule treatment
GSE122321	RNA sequencing	in vivo	Cd4+ T Cells	GSE122323	30964004	infection status; progression types
GSE122655	RNA sequencing	in vitro	Hek293T Cells	GSE122657	31344124	HIV variants and mutated proteins
GSE122656	ncRNA sequencing	in vitro	Hek293T Cells	GSE122657	31344124	HIV variants and mutated proteins
GSE124466	ncRNA sequencing	in vitro	Cd4+ T Cells		30788509	infection status
GSE125686	RNA sequencing	in vivo	Nk Cells		30185599	infection status
GSE12597	Microarray	in vivo	B Cells		18780835	infection status
GSE126752	RNA sequencing	in vivo	Mucosa-Associated Invariant T Cells			time-series
GSE128280	Microarray	in vivo	Cd4+ T Cells	GSE128297	31308541	cell subtypes; progression types
GSE128296	Microarray	in vivo	Cd4+ T Cells	GSE128297	31308541	progression types; small molecule treatment
GSE129506	Microarray	in vitro	U-937 Cells		31484431	infection status; other; small molecule treatment
GSE12963	Microarray	in vitro	Cd4+ T Cells		19050264	HIV variants and mutated proteins; infection status
GSE129872	Microarray	in vivo	Cd4+ T Cells	GSE128297	31308541	progression types
GSE13395	Microarray	in vitro	Monocyte-Derived Macrophages		19048100	infection status; time-series
GSE14278	Microarray	in vivo	Cd4+ T Cells	GSE14280	20887221	progression types
GSE14279	Microarray	in vivo	Cd4+ T Cells	GSE14280	20887221	progression types
GSE1441	Microarray	in vitro	Ach-2 (Infected) And A3.01 (Control) Cells		15308739	HIV latency and reactivation; infection status; time-series
GSE1443	Microarray	in vitro	Ach-2, J1.1, U1, A3.01, Jurkat,U-937 Cells		15308739	infection status
GSE14542	Microarray	in vivo	Monocytes		19299747;22815948	infection status; other
GSE14596	Microarray	in vivo	Cd4+ T Cells		19369341	other
GSE16363	Microarray	in vivo	Lymph Node		19596987;21525393	infection stages; infection status
GSE16755	Microarray	in vitro	Monocyte-Derived Macrophages		19556424	cytokine treatment
GSE17372	Microarray	in vivo	Lymphoma		20216076	HIV associated diseases
GSE17440	Microarray	in vivo	Frontal Cortex	GSE17491	20436668	HIV associated diseases
GSE17486	ncRNA microarray, RT-PCR, Other	in vivo	Frontal Cortex	GSE17491	20436668	HIV associated diseases; infection status
GSE18233	Microarray	in vivo	Cd4+ T Cells		20195503	infection status; quantitative characteristics of HIV infection; small molecule treatment
GSE18464	Microarray	in vivo	Monocytes		20495440;23437063	infection status; quantitative characteristics of HIV infection
GSE18468	Microarray	in vivo	Cd14+ Monocytes		22084402	infection status; other; small molecule treatment
GSE19087	Microarray	in vivo	Peripheral Blood Mononuclear Cells		19952713	other; small molecule treatment
GSE19811	Microarray	in vivo	Adipose Tissue			infection status
GSE20075	Microarray	in vivo	Recto-Sigmoid Biopsy		20160163	progression types
GSE20088	Microarray	in vitro	Jurkat Cells		20139419	HIV variants and mutated proteins
GSE21017	Microarray	in vitro	Immature Monocyte-Derived Dendritic Cells			HIV variants and mutated proteins; infection status
GSE21589	Microarray	in vivo	Lymph Node		20935203	quantitative characteristics of HIV infection
GSE2171	Microarray	in vivo	Peripheral Blood Mononuclear Cells		15897992	other
GSE21892	ncRNA microarray	in vitro	Cemx174 Cells		21569500	HIV variants and mutated proteins; infection status
GSE22420	ncRNA microarray	in vivo	Lymphoma		21701491	HIV associated diseases
GSE22768	Microarray	in vivo	Peripheral Blood Mononuclear Cells	GSE22822	23151505	time-series; vaccine treatment
GSE22769	Microarray	in vivo/in vitro	Peripheral Blood Mononuclear Cells	GSE22822	23151505	vaccine treatment
GSE23879	Microarray	in vivo	Cd4+ T Cells		21177805	infection status; progression types
GSE24022	ncRNA microarray	in vivo	Cd4+ T Cells		22586040	infection status; progression types
GSE24081	Microarray	in vivo	Cd8+ T Cells	GSE24082	20890291	progression types
GSE2504	Microarray	in vitro	Jurkat Cells		15890899	cytokine treatment; infection status
GSE2505	Microarray	in vitro	Peripheral Blood Mononuclear Cells		16352629	co-infections
GSE25456	RT-PCR	in vivo	Cd4+ And Cd8+ T Cells, Naive And Memory		21257970	infection status
GSE25669	Microarray	in vivo	B Cells, Cd4+ T Cells, Cd8+ T Cells, Polymorphonuclear Cells, Monocytes, Nk Cells			infection status
GSE26469	RT-PCR	in vitro	U1 Cells		21357269	small molecule treatment
GSE26673	Microarray	in vivo	Lymphoma		21245480	HIV associated diseases
GSE28128	Microarray	in vivo	Cd4+ And Cd8+ T Cells		21555857	progression types
GSE28160	Microarray	in vivo	Brain		21909266	HIV associated diseases; infection status
GSE28177	Microarray	in vivo	Jejunum		21345945	infection status; other; small molecule treatment
GSE28944	Microarray	in vitro	Macrophages			infection status; time-series
GSE29429	Microarray	in vivo	Whole Blood			infection status; other; small molecule treatment
GSE29507	Microarray	in vivo	Frontal Cortex		27053842	HIV associated diseases; infection status
GSE29939	Microarray	in vitro	Cd4+ T Cells, Macrophages, Astrocytes			infection status; time-series
GSE30310	Microarray	in vivo	Peripheral Blood Mononuclear Cells, Skeletal Muscle, Adipose Tissue		22476717	infection status; small molecule treatment
GSE30536	Microarray	in vitro	Monocyte-Derived Macrophages		22140520	cytokine treatment; infection status; time-series
GSE30734	Microarray	in vitro	Jurkat Cells	GSE30739	22073215	HIV variants and mutated proteins
GSE33387	ncRNA microarray	in vivo	Peripheral Blood Mononuclear Cells	GSE33617	22240256	infection status; progression types
GSE33492	Other	in vivo	Peripheral Blood Mononuclear Cells	GSE33617	22240256	infection status; progression types
GSE33514	RT-PCR	in vivo	Cd4+ T Cells		22286198	infection status; progression types
GSE33580	Microarray	in vivo	Whole Blood		22291902	infection status; progression types
GSE33705	Microarray	in vitro	We17/10	GSE32626		HIV variants and mutated proteins
GSE33706	Microarray	in vitro	We17/10	GSE32626		infection status
GSE33837	ncRNA microarray	in vitro	Peripheral Blood Mononuclear Cells	GSE33879	21829495	infection status
GSE33877	Microarray	in vitro	Peripheral Blood Mononuclear Cells	GSE33879	21829495	infection status
GSE34252	Microarray	in vitro	Cd4+ T Cells		23635305	HIV latency and reactivation
GSE3489	Microarray	in vivo	Frontal Cortex		15579294	HIV associated diseases
GSE35864	Microarray	in vivo	Basal Ganglia, White Matter, Frontal Cortex		23049970	HIV associated diseases; infection status
GSE36557	RT-PCR	in vivo	Whole Blood			quantitative characteristics of HIV infection
GSE37250	Microarray	in vivo	Whole Blood		24167453	co-infections; infection status
GSE38006	RNA sequencing	in vitro	Supt1 Cells		21933919	infection status; time-series
GSE38542	Microarray	in vivo	Monocytes		23437063	co-infections
GSE38556	ncRNA microarray	in vivo	Monocytes			infection status; progression types
GSE38634	Microarray	in vitro	H9/Htlv-Iiib, Cem-Ss Cells			HIV latency and reactivation
GSE38908	Microarray	in vivo	Tongue Dorsum Scraping		22838383	infection status; microbiome changes; small molecule treatment
GSE39506	Microarray	in vivo	Peripheral Blood Mononuclear Cells			vaccine treatment
GSE39939	Microarray	in vivo	Whole Blood	GSE39941	24785206	co-infections; infection status
GSE39940	Microarray	in vivo	Whole Blood	GSE39941	24785206	co-infections; infection status
GSE40550	Microarray	in vitro	Cd4+ T Cells		23760244;23434645	HIV latency and reactivation
GSE4124	Microarray	in vivo	Peripheral Blood Mononuclear Cells		16691187	other
GSE41731	Microarray	in vitro	Monocyte-Derived Macrophages		23276142	cytokine treatment; infection status
GSE42058	Microarray	in vivo	Cd11C+ Myeloid Dendritic Cells		24023646	infection status
GSE42291	Microarray	in vitro	End1/E6E7 Cells			infection status
GSE42574	Microarray	in vitro	Jurkat Cells	GSE42576	23333304	HIV variants and mutated proteins; time-series
GSE42737	ncRNA microarray	in vitro	Cd4+ T Cells		22080513	time-series
GSE42924	Microarray	in vitro	Immature Monocyte-Derived Dendritic Cells	GSE42926		HIV variants and mutated proteins
GSE42925	Microarray	in vitro	Monocyte-Derived Macrophages, Macrophages Differentiated From Thp-1 Cells	GSE42926		HIV variants and mutated proteins
GSE43746	Microarray	in vivo	Recto-Sigmoid Biopsy		23843452	infection status; microbiome changes; progression types; small molecule treatment
GSE44216	Microarray	in vivo	Peripheral Blood Mononuclear Cells		23592504	progression types
GSE44228	Microarray	in vivo	Peripheral Blood Mononuclear Cells		23933117	small molecule treatment
GSE44265	Microarray, ncRNA microarray	in vitro	Primary Human Neurons, Sh-Sy5Y Cells		21956116	HIV variants and mutated proteins
GSE44266	Microarray, ncRNA microarray	in vitro	Primary Human Neurons, Sh-Sy5Y Cells		21816823	HIV variants and mutated proteins
GSE44332	RT-PCR	in vivo	Peripheral Blood Mononuclear Cells		23592504	infection status; progression types
GSE44460	Microarray	in vitro	T Cells		23898208	HIV variants and mutated proteins
GSE44914	Microarray	in vitro	Vk2/E6E7 Cells		23867815	HIV variants and mutated proteins
GSE46018	Other	in vivo	Peripheral Blood Mononuclear Cells			infection status; progression types
GSE46599	Microarray	in vitro	Various Cell Lines And Primary Cells		24048477	other
GSE47172	Microarray	in vivo	Whole Blood		29637127	HIV associated diseases; infection status
GSE4755	Microarray	in vivo	Frontal Cortex			HIV associated diseases
GSE4761	ncRNA microarray	in vitro	I-21 Cells		17322031	infection status; time-series
GSE48237	Microarray	in vivo	Peripheral Blood Mononuclear Cells		25589068	HIV associated diseases
GSE48800	ncRNA microarray	in vitro	Jurkat Cells		28968466	HIV variants and mutated proteins
GSE49019	Microarray	in vitro	B Cells		24162774	HIV variants and mutated proteins; time-series
GSE50011	Microarray	in vivo	Monocytes		24094461	HIV associated diseases; other
GSE50834	Microarray	in vivo	Peripheral Blood Mononuclear Cells		24587128	co-infections
GSE5106	Microarray	in vivo	Skeletal Muscle		17440010	small molecule treatment
GSE511	Microarray	in vitro	Peripheral Blood Mononuclear Cells		11839152	infection status; time-series
GSE5220	Microarray	in vivo	Monocytes		17005663	other; small molecule treatment
GSE52344	Microarray	in vitro	Cd4+ T Cells			infection status; other
GSE52791	Other	in vivo	Bronchoalveolar Lavage		24752365	microbiome changes
GSE52900	Microarray	in vivo	Monocytes		24370116	infection status; other
GSE53527	Microarray	in vivo	Cd4+ T Cells			infection stages; progression types
GSE53712	Microarray	in vitro	Thp-1 Cells			HIV variants and mutated proteins; small molecule treatment; time-series
GSE53993	RNA sequencing	in vitro	Supt1 Cells		24850744	infection status; time-series
GSE55029	Microarray	in vitro	Monocyte-Derived Macrophages			HIV variants and mutated proteins; infection status
GSE55069	ncRNA microarray	in vivo	Caudate		21170291	HIV associated diseases; infection status
GSE56090	Microarray	in vitro	Ht29 Cells Co-Cultured With Jurkat Cells		19285003	infection status
GSE56484	Microarray	in vitro	Supt1 Cells			infection status; time-series
GSE56499	RT-PCR	in vivo	B Cell Subsets		24892810	cell subtypes
GSE56591	Microarray	in vitro	Monocyte-Derived Macrophages		25170834	HIV variants and mutated proteins
GSE56619	Microarray	in vivo	Peripheral Blood Mononuclear Cells		25101888	co-infections; small molecule treatment
GSE56804	Microarray	in vivo	Cd4+ T Cells		24769244	small molecule treatment
GSE56837	Microarray	in vivo	Whole Blood		25225669	progression types
GSE57323	RT-PCR	in vivo	Peripheral Blood Mononuclear Cells		25225963	infection status; progression types; small molecule treatment
GSE57730	Microarray	in vivo	Whole Blood			progression types
GSE57763	ncRNA sequencing	in vitro	Supt1 Cells		23386435	infection status; time-series
GSE58411	Microarray	in vivo	Whole Blood		26399326	HIV associated diseases; time-series
GSE58868	RT-PCR	in vivo	Plasma			infection status; progression types
GSE58994	Microarray	in vitro	Peripheral Blood Mononuclear Cells		25156368	HIV variants and mutated proteins; infection status; time-series
GSE59991	Microarray	in vitro	Monocyte-Derived Macrophages			infection status
GSE61171	Microarray	in vitro	Monocyte-Derived Dendritic Cells		26116899	HIV variants and mutated proteins
GSE65412	Microarray	in vitro	Monocytes		25609807	other
GSE65541	Microarray	in vitro	Hek293T Cells And Cd4+ T Cells		26849062	other
GSE65688	RNA sequencing	in vitro	Jurkat Cells	GSE65689		HIV variants and mutated proteins
GSE6673	ncRNA microarray	in vitro	Jurkat Cells		17322031	infection status
GSE66972	Microarray	in vivo	Th17-Subsets			cell subtypes
GSE67352	Microarray	in vivo	Follicular Helper T Cells			infection status; progression types
GSE6740	Microarray	in vivo	Cd4+ And Cd8+ T Cells		17251300	infection stages; infection status; progression types
GSE68191	Microarray	in vitro	Mature And Immature Monocyte-Derived Dendritic Cells		28148784	HIV variants and mutated proteins; infection status
GSE68563	Microarray	in vitro	Peripheral Blood Mononuclear Cells		26821323	infection status
GSE69557	Microarray	in vivo	Cd34+ Hematopoietic Stem Cells		26436997	infection status
GSE69581	Microarray	in vivo	Whole Blood		29339504	co-infections
GSE69589	Microarray	in vitro	Liver Kupffer Cells			infection status
GSE70106	RNA sequencing	in vivo	Subtypes Of Dendritic Cells		26362311	cell subtypes
GSE70396	Microarray	in vivo	T Helper Subtypes			cell subtypes
GSE70851	ncRNA sequencing, RNA sequencing	in vitro	Monocyte-Derived Macrophages		26226348	infection status
GSE71063	Microarray	in vivo	Whole Blood	GSE71065	26935044	small molecule treatment
GSE71064	Microarray	in vivo	Whole Blood	GSE71065	26935044	small molecule treatment
GSE71650	ncRNA microarray	in vivo	Cd8+ T Cells			infection status; progression types; small molecule treatment
GSE73968	Microarray	in vivo	Naive, Central Memory, Effector Memory Cd4+ T Cells			infection status
GSE74790	Microarray	in vivo	Peripheral Blood Mononuclear Cells			progression types
GSE74818	Microarray;ncRNA microarray	in vitro	Supt1 Cells		27782208	infection status; time-series
GSE76403	Microarray	in vivo	Peripheral Blood Mononuclear Cells		27117807	infection status; other
GSE76793	Microarray	in vitro	Cem-Gfp Cells		26915805	HIV variants and mutated proteins
GSE76867	ncRNA microarray	in vivo	Colon			infection status
GSE76947	RNA sequencing	in vitro	Hela Cells		27928057	small molecule treatment
GSE77088	RNA sequencing	in vivo	Innate Lymphoid Cells Type 2 And Type 3		26850658	infection status; small molecule treatment; time-series
GSE77890	ncRNA sequencing, Other	in vitro	Hek293T Cells			HIV variants and mutated proteins
GSE77939	Microarray	in vivo	Peripheral Blood Mononuclear Cells			infection status; other; small molecule treatment
GSE78522	RNA sequencing	in vivo	Cd8+ T Cells		28100833	infection status
GSE81137	ncRNA microarray	in vivo	Human Cervical Smear Collected With Cyto Brush			co-infections; infection status
GSE81198	RNA sequencing	in vivo	Intestinal Epithelial Cells		29505600	infection status; small molecule treatment
GSE81327	Microarray	in vitro	Monocyte-Derived Macrophages		28490595	infection status; small molecule treatment; time-series
GSE81810	RNA sequencing	in vitro	Cd4+ T Cells		27898737	HIV latency and reactivation; infection status
GSE82061	RNA sequencing, Other	in vitro	Jurkat Cells		27870832	HIV latency and reactivation; other
GSE83482	RNA sequencing	in vivo	Cd4+ T Cells Subsets			cell subtypes
GSE83892	Microarray	in vivo	Whole Blood		27932622	HIV associated diseases
GSE84197	RNA sequencing	in vitro	Central Memory T Cells	GSE84203	28147284	HIV latency and reactivation
GSE86404	Microarray	in vitro	Lamina Propria Mononuclear Cells		28241075	infection status; microbiome changes
GSE87620	Microarray	in vivo	Cd8+ T Cells		30289807	infection status; progression types
GSE89266	RNA sequencing	in vitro	Jurkat Cells			HIV variants and mutated proteins
GSE8964	Microarray	in vivo	Peripheral Blood Mononuclear Cells		18311149	progression types
GSE89868	ncRNA sequencing	in vitro	Cem-Ss Cells		28096489	other
GSE90897	RNA sequencing	in vivo	Dendritic Cells		28138558	other
GSE95297	RNA sequencing	in vitro	Cd4+ T Cells			HIV latency and reactivation; infection status; time-series
GSE97611	ncRNA microarray	in vivo	Neocortex		28594894	HIV associated diseases
GSE98902	Microarray	in vivo	Cd4+ And Cd8+ T Cells		29324842	small molecule treatment
GSE9927	Microarray	in vivo	Cd4+ T Cells		18077723	infection status
GSE99737	RNA sequencing	in vivo	Platelets		30062189	infection status
	Expression profiling by array
	Expression profiling by array, Non-coding RNA profiling by array
	Expression profiling by array;Non-coding RNA profiling by array
	Expression profiling by high throughput sequencing
	Expression profiling by high throughput sequencing, Other
	Expression profiling by RT-PCR
	Non-coding RNA profiling by array
	Non-coding RNA profiling by array, Expression profiling by RT-PCR, Other
	Non-coding RNA profiling by high throughput sequencing
	Non-coding RNA profiling by high throughput sequencing, Expression profiling by high throughput sequencing
	Non-coding RNA profiling by high throughput sequencing, Other
	Other

## Sheet: Table S4
Table S4. The list of HIV-related single-cell transcriptomic experiments.
GEO ID	Experiment type	Cell types	Linked data in GEO	Description	Pubmed IDs
GSE110684	in vivo	CD69+ CD8+ T cells	Y	Single cell and bulk RNA sequencing of resident memory T cell transcriptome	29858286
GSE97727	in vivo	Lin-CD56+CD94+ (NK) and Lin-CD56+CD94- (CD127-ILC1) cells	GSE122326	Single cell and bulk RNA sequencing of Lin-CD56+CD94+ and Lin-CD56+CD94- cell transcriptome	https://www.biorxiv.org/content/10.1101/221010v3
GSE111727	in vitro	CD4+ T cells		Single cell and bulk RNA sequencing of CD4+ T cells: latently infected or treated with two reactivation agents	29694901
GSE104490	in vivo	CD4+ T cells		Single cell RNA sequencing of reactivated latent CD4+ cells, control (unpurified cells from the same donor) and cells actively infected in vitro using HIV-1 (YU2 isolate)	29686423
GSE80212	in vitro / in vivo	dendritic cells	GSE108445	Single cell RNA sequencing of dendritic cells from elite controllers after infection by HIV-1 in vitro	29378643
GSE117397	in vivo	peripheral blood mononuclear cells and cerebrospinal fluid		Single cell RNA sequencing on cerebrospinal fluid and blood from patients with HIV	30232286

## Sheet: Table S5
Table S5. The list of HIV-related proteomic experiments. * conditions from Table 4 of the text of Review.
PRIDE/GEO ID	Experimental approach	Experiment type	Cell type	Linked data in GEO	Pubmed ID	Conditions*
PXD014002	Mass spectrometry	in vitro	monocytes		31562326	infection status
PXD010436	Mass spectrometry	in vitro	HEK293T cells		31315557	infection status; time-series
PXD012263	Mass spectrometry	in vitro	CD4+ T cells, CEM-T4 cells		30857592	HIV variants and mutated proteins; infection status
PXD005810	Mass spectrometry	in vitro	SupT1 cells	GSE100587	30659199	infection status; time-series
PXD009723	Mass spectrometry	in vivo	secretions from vaginal fornix		30504243	other
PXD009007	Mass spectrometry	in vivo	serum		29608613	co-infections, other
PXD006230	Mass spectrometry	in vitro	Jurkat cells		28606917	HIV variants and mutated proteins
PXD006314	Mass spectrometry	in vitro	embryonic stem cell neuron		28611588	HIV variants and mutated proteins; infection status; time-series
PXD006332	Mass spectrometry	in vitro	embryonic stem cell neuron		28611588	HIV variants and mutated proteins; infection status; time-series
PXD005234	Mass spectrometry	in vitro/in vivo	CD4+ T cells		28223351	infection status; time-series
PXD004241	Mass spectrometry	in vitro	SH-SY5Y cells		28101920	HIV variants and mutated proteins
PXD004187	Mass spectrometry	in vitro	CEM-T4 cells		27690223	HIV variants and mutated proteins; infection status
PXD003561	Mass spectrometry	in vitro	ACH-2 (infected) and A3.01 (control) cells		27195445	HIV latency and reactivation; infection status
PXD002934	Mass spectrometry	in vitro	CEM-T4 cells		26439863	HIV variants and mutated proteins; infection status; time-series
PXD001435	Mass spectrometry	in vivo	cervicovaginal cells		26349657	microbiome types
PXD002150	Mass spectrometry	in vitro	CD4+ T cells		26343910	HIV latency and reactivation
PXD000064	Mass spectrometry	in vitro	monocyte-derived macrophages, H9 and CEMx174 cells		23432411	other
-	Mass spectrometry	in vitro	CD4+ T cells		29084447	HIV latency and reactivation
-	Mass spectrometry	in vitro	SupT1 cells		22542004	infection status; time-series
-	Mass spectrometry	in vitro	Jurkat cells		29425767	infection status
-	Mass spectrometry	in vitro	CD4+ T cells		24958850	other
-	Luciferase immunoprecipitation systems	in vivo	whole blood		28386076	progression types
PXD013221	Mass spectrometry	in vitro	CEM-T4 cells		31042482	HIV variants and mutated proteins; infection status
GSE66659	Protein profiling by protein array	in vivo	serum		25938510	other
GSE42673	Protein profiling by protein array	in vitro	-		23359068	other
GSE24037	Protein profiling by protein array	in vivo	saliva	GSE24411	-	other
GSE24064	Protein profiling by protein array	in vivo	saliva, plasma	GSE24411	-	other

## Sheet: Table S6
Table S6. The list of HIV-related epigenomic experiments. * conditions from Table 4 of the text of Review.
GEO ID	Experimental approach	Type of epigenomic data	Experiment type	Cell type	Linked data in GEO	Pubmed IDs	Conditions*
GSE77696	Methylation profiling by array	DNA methylation	in vivo	whole blood		27672717	infection status
GSE67705	Methylation profiling by array	DNA methylation	in vivo	whole blood		27105112	infection status
GSE42626	Methylation profiling by array	DNA methylation	in vivo	lymphoma cells		24335480	HIV associated diseases
GSE117859	Methylation profiling by genome tiling array	DNA methylation	in vivo	whole blood	GSE117861	30545403	other
GSE117860	Methylation profiling by genome tiling array	DNA methylation	in vivo	whole blood	GSE117861	30545403	other
GSE100264	Methylation profiling by genome tiling array	DNA methylation	in vivo	whole blood	GSE107082	29269866	co-infections
GSE107080	Methylation profiling by genome tiling array	DNA methylation	in vivo	whole blood	GSE107082	29269866	co-infections
GSE59550	Methylation profiling by genome tiling array	DNA methylation	in vivo	peripheral blood mononuclear cells		26441693	other
GSE87582	Methylation profiling by genome tiling array	DNA methylation	in vivo	CD8+ T cells, monocytes		27629381	HIV associated diseases
GSE67751	Methylation profiling by genome tiling array	DNA methylation	in vivo	whole blood		25969563	infection status; other
GSE67749	Methylation profiling by genome tiling array	DNA methylation	in vivo	frontal lobe		25969563	infection status; other
GSE67748	Methylation profiling by genome tiling array	DNA methylation	in vivo	cerebellum		25969563	infection status; other
GSE59457	Methylation profiling by genome tiling array	DNA methylation	in vivo	cerebellum, frontal lobe, hippocampus, medial frontal cortex, occipital cortex, temporal cortex		25969563	infection status; other
GSE53841	Methylation profiling by genome tiling array	DNA methylation	in vivo	whole blood		25969563	quantitative characteristics of HIV infection
GSE53840	Methylation profiling by genome tiling array	DNA methylation	in vivo	whole blood		25313081;25969563	quantitative characteristics of HIV infection
GSE50835	Methylation profiling by genome tiling array	DNA methylation	in vivo	peripheral blood mononuclear cells		24587128	co-infections
GSE42372	Methylation profiling by array	DNA methylation	in vivo	lymphoma cells		24335480	HIV associated diseases
GSE131627	Methylation profiling by array	DNA methylation	in vivo	monocytes		31253200	infection status; other
GSE68028	Methylation profiling by genome tiling array	DNA methylation	in vivo	peripheral blood mononuclear cells		26039376;26697319	infection status
GSE37183	Genome binding/occupancy profiling by genome tiling array	protein binding/occupancy	in vitro	CEM-GFP cells			HIV variants and mutated proteins
GSE42191	Genome binding/occupancy profiling by genome tiling array	protein binding/occupancy	in vitro	KG-1 cells		23535064	HIV variants and mutated proteins
GSE30736	Genome binding/occupancy profiling by genome tiling array	histone modifications	in vitro	Jurkat cells	GSE30739	22073215	HIV variants and mutated proteins
GSE122322	Genome binding/occupancy profiling by high throughput sequencing	chromatin accessibility	in vivo	CD4+ T cells	GSE122323	30964004	infection status; progression types
GSE110684	Genome binding/occupancy profiling by high throughput sequencing	chromatin accessibility	in vivo	CD69+ and CD69- CD8+ T cells, naive CD8+ T cells from hepatic lymph node	Y	29858286	cell subtypes
GSE119015	Genome binding/occupancy profiling by high throughput sequencing	protein binding/occupancy	in vitro	THP1 cell line			HIV variants and mutated proteins
GSE100376	Genome binding/occupancy profiling by high throughput sequencing	chromatin accessibility	in vitro	monocyte-derived dendritic cells	GSE100377	29544097	infection status; small molecule treatment; time-series
GSE61003	Genome binding/occupancy profiling by high throughput sequencing	protein binding/occupancy	in vitro	CD4+ T cells		25525795	other
GSE58247	Genome binding/occupancy profiling by high throughput sequencing	histone modifications	in vitro	latency cell lines (NCHA1, NCHA2, and ACH2) and control CD4+ T cell line (A3.01)		24762674	HIV latency and reactivation
GSE30738	Genome binding/occupancy profiling by high throughput sequencing	protein binding/occupancy	in vitro	Jurkat cells	GSE30739	22073215	HIV variants and mutated proteins
GSE122826	Genome binding/occupancy profiling by high throughput sequencing	histone modifications	in vitro	CD4+ T cells		31492853	other
GSE65687	Genome binding/occupancy profiling by high throughput sequencing	protein binding/occupancy	in vitro	Jurkat cells	GSE65689		HIV variants and mutated proteins
GSE84199	Genome binding/occupancy profiling by high throughput sequencing	protein binding/occupancy	in vitro	cultured central memory T cells	GSE84203	28147284	HIV latency and reactivation
GSE42575	Genome binding/occupancy profiling by high throughput sequencing	protein binding/occupancy	in vitro	Jurkat cells	GSE42576	23333304	HIV variants and mutated proteins; time-series
GSE74016	Other	RNA methylation	in vitro	MT4 T-cells		27572442	infection status
